# Supplementary material for: A stable and recyclable Z-scheme g-C3N4/rGO/BiVO4 heterojunction photocatalyst for site-selective C-3 formylation of indoles with methanol as a formyl source under visible light
Source: Royal Society of Chemistry journal article supplement (doi:10.1039/d2gc03858g), 2022-12-01

## Supporting Information

### **Stable and recyclable Z-scheme g-C<sub>3</sub>N<sub>4</sub>/rGO/BiVO<sub>4</sub> heterojunction photocatalyst for site-selective C-3 formylation of indoles with methanol as a formyl source under visible light**

Zhenkai Lei,<sup>a,c</sup> Fei Xue,<sup>a</sup> Bin Wang,<sup>a</sup> Shijie Wang,<sup>a</sup> Yonghong Zhang,<sup>a</sup> Yu Xia,<sup>a</sup> Weiwei Jin<sup>a</sup> and Chenjiang Liu<sup>\*a,b</sup>

*<sup>a</sup>State Key Laboratory of Chemistry and Utilization of Carbon Based Energy Resources, Key Laboratory of Oil and Gas Fine Chemicals, Ministry of Education & Xinjiang Uygur Autonomous Region, Urumqi Key Laboratory of Green Catalysis and Synthesis Technology, College of Chemistry, Xinjiang University, Urumqi 830017, Xinjiang, PR China.*

*<sup>b</sup>College of Future Technology, Institute of Materia Medica, Xinjiang University, Urumqi 830017, Xinjiang, PR China.*

*<sup>c</sup>Xinjiang Uygur Autonomous Region Product Quality Supervision and Inspection Institute, Urumqi 830011, Xinjiang, PR China.*

\*Corresponding author. Tel: +86-991-2859286; E-mail: [pxylcj@126.com](mailto:pxylcj@126.com)

## Table of Contents

|                                                                                                                |    |
|----------------------------------------------------------------------------------------------------------------|----|
| 1. The spectrum of our lamp and the visible light irradiation instrument .....                                 | 3  |
| 2. Experimental procedures .....                                                                               | 4  |
| 2.1. Materials .....                                                                                           | 4  |
| 2.2. Preparation of CN nanosheets, BVO, rGO, and rGO/CN binary composite.....                                  | 4  |
| 2.3. Preparation of rGO/BVO, CN/BVO binary composites, and <i>x</i> wt% CN/rGO/BVO<br>ternary composites ..... | 6  |
| 2.4. Characterization .....                                                                                    | 7  |
| 2.5. Optimization of the photocatalytic reaction conditions .....                                              | 9  |
| 2.6. General procedure for synthesis of substrates .....                                                       | 12 |
| 2.7. General procedure for synthesis of products .....                                                         | 12 |
| 2.8. Unreacted substrates .....                                                                                | 13 |
| 3. Gram-scale reaction and application of present work .....                                                   | 13 |
| 3.1. Gram-scale reaction .....                                                                                 | 13 |
| 3.2. Application of present work .....                                                                         | 14 |
| 4. Mechanistic studies.....                                                                                    | 15 |
| 4.1. HCHO (aq.) as a formyl source .....                                                                       | 15 |
| 4.2. Isotope labeling experiments .....                                                                        | 15 |
| 4.3. Quenching experiments .....                                                                               | 19 |
| 4.4. H <sub>2</sub> detection experiment.....                                                                  | 20 |
| 4.5. Conversion of <b>5</b> to <b>2a</b> .....                                                                 | 20 |
| 5. Reusability of photocatalyst .....                                                                          | 21 |
| 6. Spectral Data.....                                                                                          | 21 |
| 7. References.....                                                                                             | 33 |
| 8. Copies of NMR spectra .....                                                                                 | 35 |

## 1. The spectrum of our lamp and the visible light irradiation instrument

Photocatalytic reaction was implemented under visible light irradiation by a blue LED at room temperature. In this reaction system, RLH-18 8-position Photo Reaction System manufactured by Beijing RogerTech Ltd. was used. In this photo reactor, eight 10 W blue LEDs were equipped. The blue LED's energy peak wavelength is 452.6 nm, peak width at half-height is 18.9 nm, irradiance/10 W is 264.7 mW/cm<sup>2</sup>. The reaction vessel is glass reaction tube and the distance between it and the lamp is 15 mm, no filter applied.

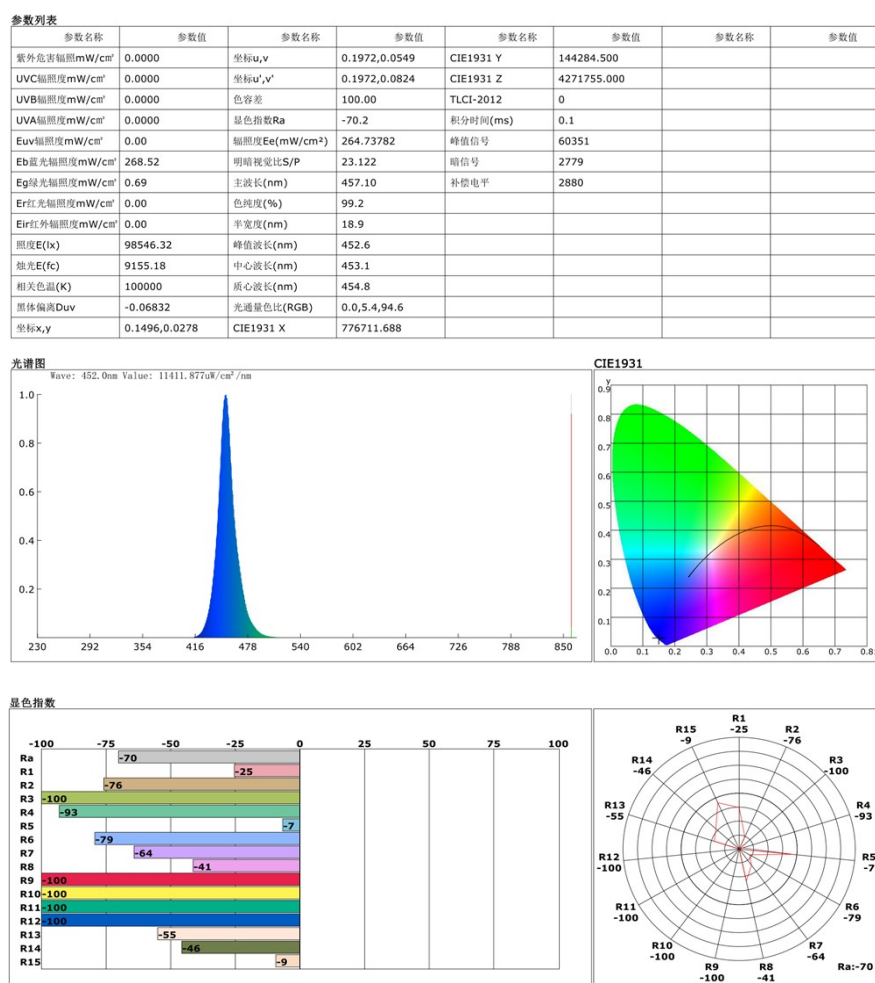

Fig. S1 The spectrum of light source (blue LED).

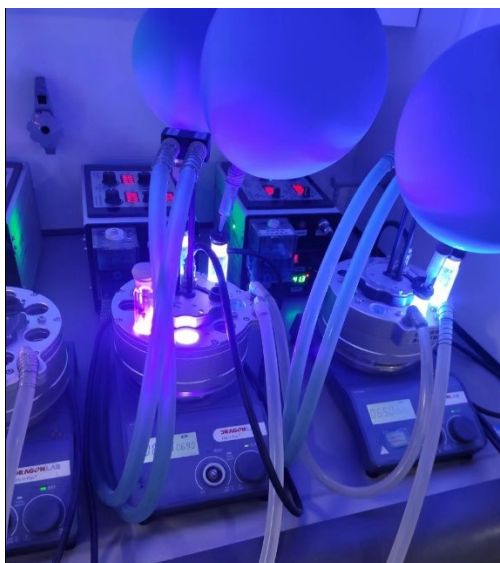

**Fig. S2** The visible light irradiation instrument.

## **2. Experimental procedures**

### *2.1. Materials*

Substituted indoles are all known compounds and synthesized according to the reported method. The other chemical reagents were purchased from commercial sources and used as received unless otherwise indicated.

### *2.2. Preparation of CN nanosheets, BVO, rGO, and rGO/CN binary composite*

The CN sample was prepared according to the reported literature.<sup>[1]</sup> The CN was synthesized by thermal treatment of 10 g urea in a crucible with a cover under ambient pressure in air. After drying at 80 °C for 24 h, the precursor was heated to 550 °C at a heating rate of 2.3 °C min<sup>-1</sup> in a tube furnace for 4 h in air. The resulting final light yellow powder was washed with nitric acid (0.1 M) and distilled water to remove any residual alkaline species (e.g. ammonia) adsorbed on the sample surface. The CN powder was obtained by vacuum drying at 80 °C for 24 h.

The BVO was synthesized according to a previous work.<sup>[2]</sup> Specifically, 1.08 mmol of Bi(NO<sub>3</sub>)<sub>3</sub>·5H<sub>2</sub>O and 1.08 mmol of NH<sub>4</sub>VO<sub>3</sub> were dissolved into 20 mL of HNO<sub>3</sub> solution (2 M) and 20 mL of NH<sub>3</sub>·H<sub>2</sub>O solution (2 M), separately. Then, 0.2 g

of sodium dodecyl sulfonate (SDS) dissolved in water was added to the  $\text{Bi}(\text{NO}_3)_3$  solution. Subsequently, the  $\text{Bi}(\text{NO}_3)_3$  solution was added to the  $\text{NH}_4\text{VO}_3$  solution drop by drop with constant stirring for 30 min. And then, using the  $\text{NH}_3 \cdot \text{H}_2\text{O}$  solution adjusted the pH of the mixed solution to 7, and the mixture was persisted in stirring for 2 h. Nextly, the obtained solution was transferred into a 100 mL Teflonlined stainless steel autoclave and maintained at 180 °C for 24 h. After that, the stainless autoclave was cooled to room temperature naturally. The obtained product was collected and washed three times with deionized water and absolute ethanol to remove the adsorbed surfactant on BVO surfaces. Finally, the BVO power was obtained by vacuum drying at 80 °C for 8 h.

The GO was prepared according to a improved Hummers' method.<sup>[3]</sup> A mixture of concentrated  $\text{H}_2\text{SO}_4/\text{H}_3\text{PO}_4$  (43.2 mL/4.8 mL) was added to graphite powder (2.0 g) with magnetic stirring below 5 °C for 30 min. Then,  $\text{KMnO}_4$  (6.0 g) was added extremely slowly to above mixture with magnetic stirring below 5 °C for 2 h. The reaction was warmed to 39 °C and maintained for 2.5 h with magnetic stirring. Nextly, the reaction was warmed to 60 °C, and deionized water (98 mL) was added slowly. The reaction was warmed to 98 °C, and maintained for 2.5 h with magnetic stirring. Subsequently, 30%  $\text{H}_2\text{O}_2$  (120 mL) was added to the mixture, the heating was removed and the reaction was cooled to room temperature naturally. After that, the reaction mixture was centrifuged (4000 rpm, 20min) and washed three times with HCl (0.5 M). The crude product was washed with deionized water until the sulfate was completely removed. Finally, the GO sample was obtained by vacuum drying at 60 °C for 12 h.

The rGO was obtained from GO (0.5 g) and  $\text{NaBH}_4$  (5.0 g) in deionized water by refluxing for 8 h. The crude product was washed three times with deionized water. Finally, the rGO sample was obtained by vacuum drying at 60 °C for 12 h.

The CN/rGO binary composite was fabricated by a hydrothermal method.<sup>[4]</sup> In a typical process, 5.0 mg of rGO and 100.0 mg of CN powder were dispersed in 100 mL of water, and the mixture was sonicated for 1 h. The as-obtained dispersion was transferred into a 100 mL Teflonlined stainless steel autoclave and kept at 180 °C for 24 h. The stainless autoclave was cooled to room temperature naturally. The as-

obtained crude product was collected, and washed three times with deionized water and absolute ethanol to remove the adsorbed surfactant on CN/rGO surfaces. Finally, the CN/rGO binary composite was obtained by vacuum drying at 60 °C for 12 h.

### *2.3. Preparation of rGO/BVO, CN/BVO binary composites, and x wt% CN/rGO/BVO ternary composites*

The 30% CN/rGO/BVO ternary composite was prepared by a hydrothermal method.<sup>[4]</sup> Specifically, 1.08 mmol of  $\text{Bi}(\text{NO}_3)_3 \cdot 5\text{H}_2\text{O}$  and 1.08 mmol of  $\text{NH}_4\text{VO}_3$  were dissolved into 20 mL of  $\text{HNO}_3$  solution (2 M) and 20 mL of  $\text{NH}_3 \cdot \text{H}_2\text{O}$  solution (2 M), separately. Then, 0.2 g of sodium dodecyl sulfonate (SDS) dissolved in water was added to the  $\text{Bi}(\text{NO}_3)_3$  solution. Subsequently, the  $\text{Bi}(\text{NO}_3)_3$  solution was added to the  $\text{NH}_4\text{VO}_3$  solution drop by drop with constant stirring for 30 min. And then, using the  $\text{NH}_3 \cdot \text{H}_2\text{O}$  solution adjusted the pH of the mixed solution to 7, and the mixture was persisted in stirring for 2 h. Next, 5.0 mg of rGO and 100.0 mg of CN powder were added to the above mixture with the help of ultrasonic dispersion for 1 h. The as-obtained dispersion was transferred into a 100 mL Teflonlined stainless steel autoclave and kept at 180 °C for 24 h. After that, the stainless autoclave was cooled to room temperature naturally. The as-obtained product was collected and washed three times with deionized water and absolute ethanol to remove the adsorbed surfactant on CN/rGO/BVO surfaces. Finally, the 30% CN/rGO/BVO ternary composite was obtained by vacuum drying at 60 °C for 12 h. In addition, rGO/BVO or CN/BVO binary composite was fabricated according to similar procedure of 30% CN/rGO/BVO composite without the addition of CN or rGO. According to the analogous procedure of 30% CN/rGO/BVO composite, 10 wt% of CN/rGO in BVO and 50 wt% of CN/rGO in BVO with different weight of CN/rGO (33.4 mg/1.7 mg and 166.6 mg/8.3 mg) were obtained and denoted as 10% CN/rGO/BVO and 50% CN/rGO/BVO, respectively.

### *2.4. Characterization*

X-ray diffraction (XRD) was performed on a Bruker D8 X-ray diffractometer with

a Cu-K $\alpha$  radiation in the  $2\theta$  range of 5-80°. The morphology, sizes of the obtained photocatalysts and elemental mapping images were measured using a Hitachi Regulus SU8010 scanning electron microscopy (SEM) at 15 kV. The high-resolution transmission electron microscopy (HRTEM) images of the as-synthesized materials were recorded on a JEOL JEM-2100 transmission electron microscope at 200 kV. The X-ray photoelectron spectroscopy (XPS) was measured on a Thermo Fisher Scientific ESCALAB 250Xi photoelectron spectrometer. All of the binding energies of all elements were calibrated by the C 1s peak at 284.8 eV. UV-vis diffuse reflectance spectra (DRS) of the as-obtained photocatalysts were measured using a Shimadzu UV-3600 spectrophotometer during 200-800 nm at room temperature. CHI 660E electrochemical instrument was used to perform the photocurrent with a three-electrode quartz cells (Counter electrode: Pt wire; Reference electrode: Ag/AgCl; Working electrode: photocatalysts coated ITO glass) and 300 W Xe lamp. The photoluminescence spectra (PL) were obtained on a Hitachi F-4500 fluorescence spectrophotometer (excitation wavelength: 325 nm). The H<sub>2</sub> of was detected by a gas chromatograph (SHIMADZU GC-2014 C) and analyzed by a thermal conductivity detector (TCD, 5A molecular sieve column) with column diameter (2 m  $\times$  4 mm) and argon as the carrier gas. The raman spectra (Fig. S3) was observed on Horiba LabRAM HR Evolution raman spectrometer with a 532 nm laser.

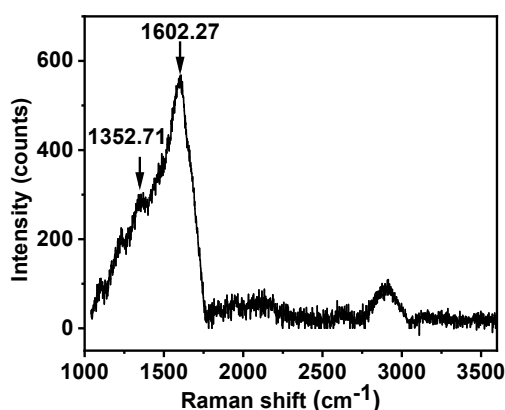

**Fig. S3** The Raman spectrum of 30% CN/rGO/BVO ternary composite.

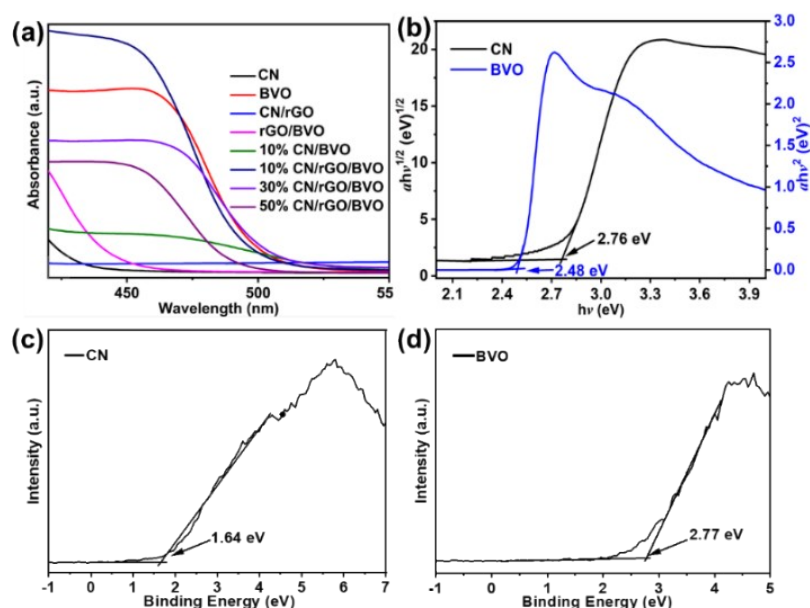

**Fig. S4** (a) UV-vis DRS of the as-synthesized different specimens, (b) the band gap of CN and BVO, (c) and (d) the valence band XPS plots of CN and BVO.

$^1\text{H}$  and  $^{13}\text{C}$  NMR spectra of the obtained organic compounds were recorded on a Varian Inova-400 or Bruker-400 (400 MHz and 100 MHz, respectively) spectrometer.  $^1\text{H}$  and  $^{13}\text{C}$  NMR chemical shifts were determined relative to internal standard TMS at  $\delta$  0.0,  $\text{CDCl}_3$  ( $\delta(^1\text{H})$ , 7.26 ppm;  $\delta(^{13}\text{C})$ , 77.16 ppm) or  $\text{DMSO}-d_6$  ( $\delta(^1\text{H})$ , 2.50 ppm;  $\delta(^{13}\text{C})$ , 39.52 ppm). Chemical shifts ( $\delta$ ) are reported in ppm, and coupling constants ( $J$ ) are in Hertz (Hz). The following abbreviations are used to explain the multiplicities: s = singlet, d = doublet, t = triplet, q = quartet, m = multiplet, br = broad. The HRMS analysis was obtained on Thermo Scientific Q-Exactive Focus mass spectrometer. The melting point was recorded on BÜCHI (M-560) and uncorrected. Analytical thin layer chromatography (TLC) was performed on 0.25 mm silica gel 60 F254 plates and viewed by UV light (254 nm). Column chromatographic purification was performed using 200-300 mesh silica gel.



## 2.5. Optimization of the photocatalytic reaction conditions

**Table S1** Different photocatalysts and dosage of photocatalyst screening.<sup>a</sup>

| Entry | Photocatalyst           | Yield (%) <sup>b</sup> |
|-------|-------------------------|------------------------|
| 1     | CN (5 mg)               | 46                     |
| 2     | BVO (5 mg)              | 25                     |
| 3     | CN/rGO (5 mg)           | 36                     |
| 4     | rGO/BVO (5 mg)          | 48                     |
| 5     | 10 % CN/BVO (5 mg)      | 55                     |
| 6     | 10 % CN/rGO/BVO (5 mg)  | 65                     |
| 7     | 30 % CN/rGO/BVO (5 mg)  | 72                     |
| 8     | 50 % CN/rGO/BVO (5 mg)  | 59                     |
| 9     | 30 % CN/rGO/BVO (8 mg)  | 82                     |
| 10    | 30 % CN/rGO/BVO (10 mg) | 75                     |
| 11    | 30 % CN/rGO/BVO (12 mg) | 51                     |
| 12    | 30 % CN/rGO/BVO (14 mg) | 56                     |
| 13    | 30 % CN/rGO/BVO (16 mg) | 48                     |

<sup>a</sup>Reaction conditions: **1a** (0.4 mmol), MeNHCy (0.4 mmol), AcOH (0.8 mmol), photocatalyst, CH<sub>3</sub>OH (3 mL), 10 W blue LED, room temperature, 58 h. <sup>b</sup>Isolated yields.

**Table S2** Different amines and the dosage of amine screening.<sup>a</sup>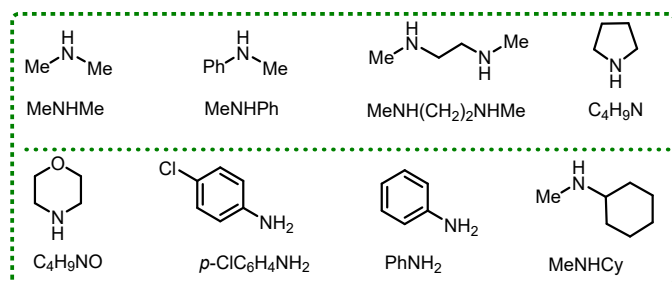

| Entry          | Amine                                                                  | Yield (%) <sup>b</sup> |
|----------------|------------------------------------------------------------------------|------------------------|
| 1              | MeNHMe (1.0 equiv.)                                                    | 63/48 <sup>c</sup>     |
| 2 <sup>d</sup> | MeNHPh (1.0 equiv.)                                                    | n.r.                   |
| 3              | MeNH(CH <sub>2</sub> ) <sub>2</sub> NHMe (1.0 equiv.)                  | 9                      |
| 4              | C <sub>4</sub> H <sub>9</sub> N (1.0 equiv.)                           | 25                     |
| 5              | C <sub>4</sub> H <sub>9</sub> NO (1.0 equiv.)                          | 25                     |
| 6              | <i>p</i> -ClC <sub>6</sub> H <sub>4</sub> NH <sub>2</sub> (1.0 equiv.) | trace                  |
| 7              | PhNH <sub>2</sub> (1.0 equiv.)                                         | trace                  |
| 8              | MeNHCy (0.05 equiv.)                                                   | 23                     |
| 9              | MeNHCy (0.1 equiv.)                                                    | 26                     |
| 10             | MeNHCy (0.2 equiv.)                                                    | 41                     |
| 11             | MeNHCy (0.5 equiv.)                                                    | 54                     |
| 12             | MeNHCy (0.8 equiv.)                                                    | 57                     |
| 13             | MeNHCy (1.2 equiv.)                                                    | 63                     |
| 14             | MeNHCy (2.0 equiv.)                                                    | 36                     |

<sup>a</sup>Reaction conditions: **1a** (0.4 mmol), amine, AcOH (0.8 mmol), 30 % CN/rGO/BVO (5 mg), CH<sub>3</sub>OH (3 mL), 10 W blue LED, room temperature, 58 h. <sup>b</sup>Isolated yields.

<sup>c</sup>48 h. <sup>d</sup>n.r. = no reaction.

**Table S3** Different acids and the dosage of acid screening.<sup>a</sup>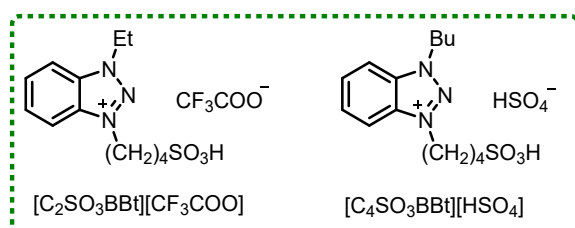

| Entry          | Acid                                                                 | Yield (%) <sup>b</sup> |
|----------------|----------------------------------------------------------------------|------------------------|
| 1              | [C <sub>2</sub> SO <sub>3</sub> BBt][CF <sub>3</sub> COO] (2 equiv.) | trace                  |
| 2              | [C <sub>4</sub> SO <sub>3</sub> BBt][HSO <sub>4</sub> ] (2.0 equiv.) | 45                     |
| 3              | H <sub>3</sub> PO <sub>4</sub> (2.0 equiv.)                          | 15                     |
| 4 <sup>c</sup> | HCl (2.0 equiv.)                                                     | n.d.                   |
| 5 <sup>c</sup> | H <sub>2</sub> SO <sub>4</sub> (2.0 equiv.)                          | n.d.                   |
| 6              | HCOOH (2.0 equiv.)                                                   | 27                     |
| 7              | PhCOOH (2.0 equiv.)                                                  | 41                     |
| 8              | AcOH (1.0 equiv.)                                                    | 41                     |
| 9              | AcOH (1.2 equiv.)                                                    | 34                     |
| 10             | AcOH (1.4 equiv.)                                                    | 45                     |
| 11             | AcOH (1.6 equiv.)                                                    | 51                     |

<sup>a</sup>Reaction conditions: **1a** (0.4 mmol), MeNHCy (0.4 mmol), acid, 30 % CN/rGO/BVO (5 mg), CH<sub>3</sub>OH (3 mL), 10 W blue LED, room temperature, 58 h.

<sup>b</sup>Isolated yields. <sup>c</sup>n.d. = not detected.

## 2.6. General procedure for synthesis of substrates (taking **1u** as an example)

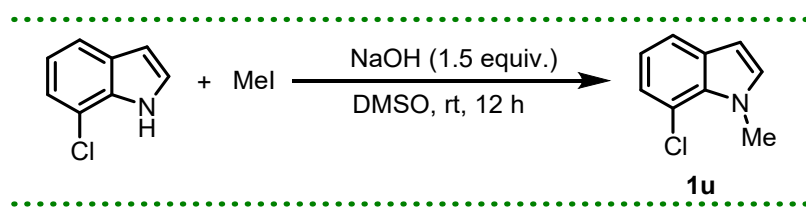

According to a literature procedure,<sup>[5]</sup> 7-Chloroindole (758 mg, 5 mmol) and NaOH (300 mg, 7.5 mmol) were dissolved in DMSO (10 mL), and iodomethane (374  $\mu\text{L}$ , 6 mmol) was slowly added to the mixed solution with magnetic stirring at room temperature for 12 h. After the reaction finished, the resulting mixture was extracted with dichloromethane (3 $\times$ 10 mL). The combined organic phase was dried over anhydrous  $\text{MgSO}_4$ , filtered, and evaporated under reduced pressure. The resultant residue was purified by silica gel column chromatography (eluent: petroleum ether (60-90  $^\circ\text{C}$ )/EtOAc = 40:1, v/v) to afford the desired product **1u** in 90% yield.

## 2.7. General procedure for synthesis of products (taking **2a** as an example)

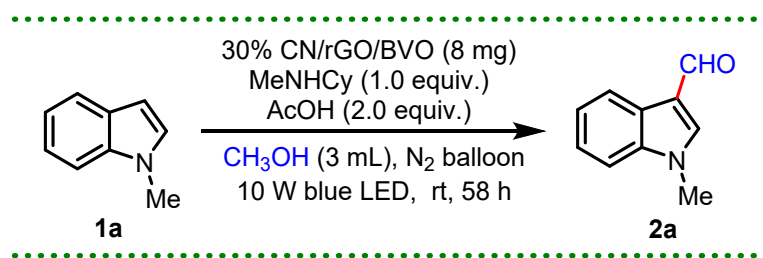

A mixture of 1-methyl-1H-indole **1a** (50  $\mu\text{L}$ , 0.4 mmol), 30% CN/rGO/BVO (8 mg), MeNHcy (53  $\mu\text{L}$ , 0.4 mmol), AcOH (48  $\mu\text{L}$ , 0.8 mmol) and  $\text{CH}_3\text{OH}$  (3 mL) was added to a 10 mL reaction tube. The reaction tube was purged with nitrogen for 5 min to exclude air inside the tube. Then, the mixture was stirred at room temperature for 58 h under 10 W blue LED irradiation with  $\text{N}_2$  atmosphere. After the reaction finished, the photocatalyst was separated by centrifugation (4,000 rpm, 3 min) and washed with EtOAc (3 $\times$ 10 mL). The combined organic phase was dried over anhydrous  $\text{MgSO}_4$ , filtered, and evaporated under reduced pressure. The residue was purified by silica gel column chromatography (eluent: petroleum ether (60-90  $^\circ\text{C}$ )/EtOAc = 5:1, v/v) to

afford the desired product **2a** in 82% yield.

## 2.8. Unreacted substrates

### Unreacted indole compounds

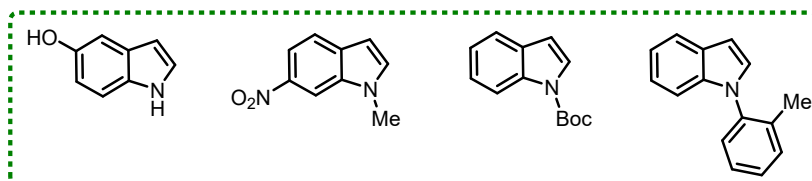

### Unreacted heterocyclic compounds

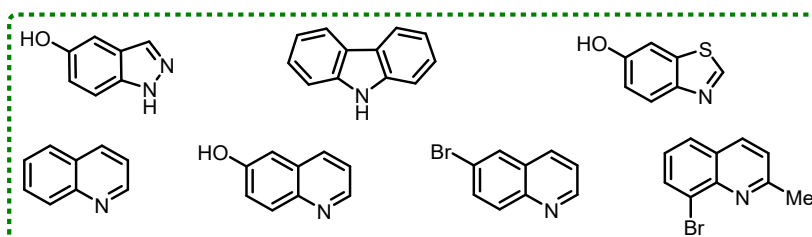

## 3. Gram-scale reaction and application of present work

### 3.1. Gram-scale reaction

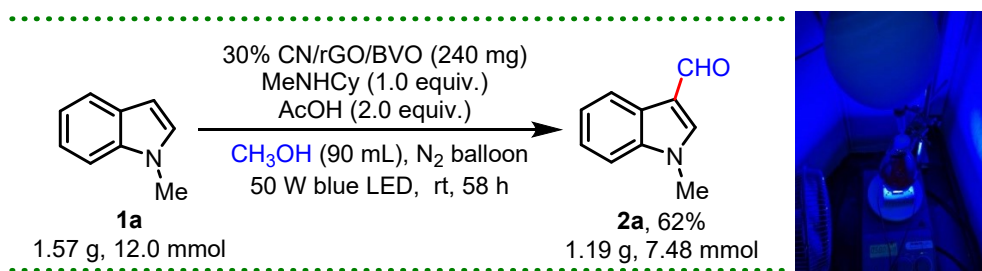

A mixture of 1-methyl-1*H*-indole **1a** (1500  $\mu$ L, 12.0 mmol), 30% CN/rGO/BVO (240 mg), MeNHCy (1590  $\mu$ L, 12.0 mmol), AcOH (1440  $\mu$ L, 24.0 mmol) and CH<sub>3</sub>OH (90 mL) was added to a 250 mL round bottom flask. The reaction tube was purged with nitrogen for 8 min to exclude air inside the tube. Then, the mixture was stirred at room temperature for 58 h under 50 W blue LED irradiation with N<sub>2</sub> atmosphere. After the reaction finished, most of the reaction solution was evaporated under reduced pressure. Next, the photocatalyst was separated by centrifugation (4,000 rpm, 3 min) and washed with EtOAc (5 $\times$ 10 mL). The combined organic phase was extracted with brine

(3×20 mL), dried over anhydrous MgSO<sub>4</sub>, filtered, and evaporated under reduced pressure. The residue was purified by silica gel column chromatography (eluent: petroleum ether (60-90 °C)/EtOAc = 5:1, v/v) to afford the desired product **2a** in 62% yield.

### 3.2. Application of present work

#### 3.2.1. Procedure for synthesis of product **3** through Knoevenagel condensation reaction

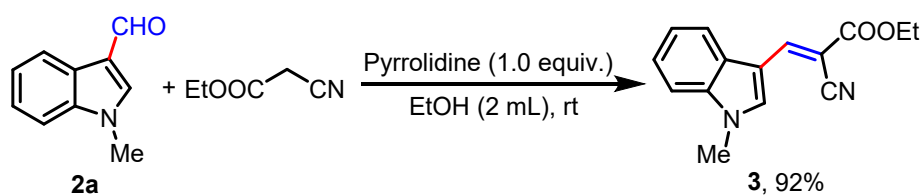

A mixture of 1-methyl-1H-indole-3-carbaldehyde **2a** (31.9 mg, 0.2 mmol), ethyl 2-cyanoacetate (32  $\mu$ L, 0.3 mmol), pyrrolidine (17  $\mu$ L, 0.2 mmol) and EtOH (2 mL) was added to a 10 mL reaction tube. Then, the mixture was stirred at room temperature for 4 h. After the reaction finished, a large amount of yellow solid was precipitated in the reaction tube, and filtered. After vacuum drying at 60 °C for 12 h, the desired product **3** was given in 92% yield.

#### 3.2.2. Procedure for synthesis of 2-(1-methyl-1H-indol-3-yl)-1H-benzo[*d*]imidazole (**4**)

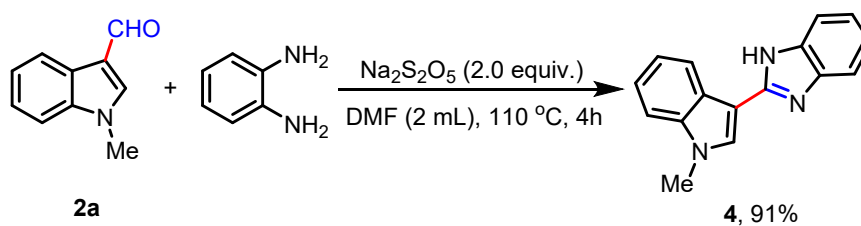

A mixture of 1-methyl-1H-indole-3-carbaldehyde **2a** (63.8 mg, 0.4 mmol), *o*-phenylenediamine (43.3 mg, 0.4 mmol), Na<sub>2</sub>S<sub>2</sub>O<sub>5</sub> (152.1 mg, 0.8 mmol) and DMF (2 mL) was added to a 10 mL reaction tube. The mixture was stirred at 110 °C for 4 h. After the reaction finished, crushed ice was added to the mixture. Then, a yellow solid precipitated in reaction tube. The resulting mixture was filtered and washed with water

to obtain yellow solid. After vacuum drying at 80 °C for 12 h, the desired product **4** was given in 91% yield.

## 4. Mechanistic studies

### 4.1. HCHO (aq.) as a formyl source

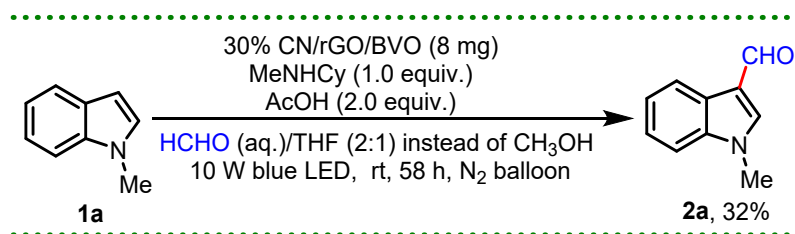

A mixture of 1-methyl-1H-indole **1a** (50  $\mu$ L, 0.4 mmol), 30% CN/rGO/BVO (8 mg), MeNHCy (53  $\mu$ L, 0.4 mmol), AcOH (48  $\mu$ L, 0.8 mmol), and 37% HCHO (aq.)/THF (v/v = 2:1, 3 mL) was added to a 10 mL reaction tube. The reaction tube was purged with nitrogen for 5 min to exclude air inside the tube. Then, the mixture was stirred at room temperature for 58 h under 10 W blue LED irradiation with N<sub>2</sub> atmosphere. After the reaction finished, the resulting mixture was evaporated under reduced pressure. Next, the photocatalyst was separated by centrifugation (4,000 rpm, 3 min) and washed with EtOAc (3 $\times$ 10 mL). The combined organic phase was extracted with brine (3 $\times$ 10 mL), dried over anhydrous MgSO<sub>4</sub>, filtered, and evaporated under reduced pressure. The residue was purified by silica gel column chromatography (eluent: petroleum ether (60-90 °C)/EtOAc = 5:1, v/v).

### 4.2. Isotope labeling experiments

#### 4.2.1. Isotope labeling experiment with CD<sub>3</sub>OD

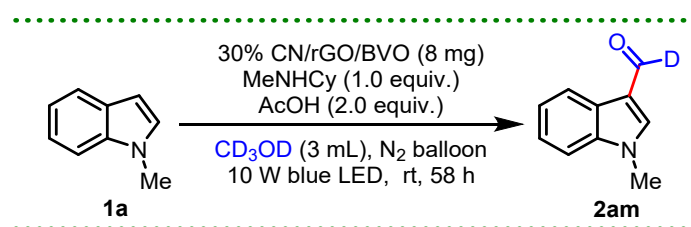

A mixture of 1-methyl-1H-indole **1a** (50  $\mu$ L, 0.4 mmol), 30% CN/rGO/BVO (8 mg), MeNHCy (53  $\mu$ L, 0.4 mmol), AcOH (48  $\mu$ L, 0.8 mmol), and CD<sub>3</sub>OD (3 mL) was added to a 10 mL reaction tube. The reaction tube was purged with nitrogen for 5 min

to exclude air inside the tube. Then, the mixture was stirred at room temperature for 58 h under 10 W blue LED irradiation with N<sub>2</sub> atmosphere. After the reaction finished, the photocatalyst was separated by centrifugation (4,000 rpm, 3 min) and washed with EtOAc (3×10 mL). The combined organic phase was dried over anhydrous MgSO<sub>4</sub>, filtered, and evaporated under reduced pressure. The residue was purified by silica gel column chromatography (eluent: petroleum ether (60-90 °C)/EtOAc = 5:1, v/v) to afford the desired product **2am** in 83% yield. Then the products were analyzed by <sup>1</sup>H NMR (Fig. S5) and HRMS (Fig. S6). Deuterated ratio of formyl group in **2a** was 67%. <sup>1</sup>H NMR (400 MHz, CDCl<sub>3</sub>) δ 9.97 (s, 0.33H), 8.30 (d, *J* = 6.7 Hz, 1H), 7.65 (s, 1H), 7.36-7.31 (m, 3H), 3.85 (s, 3H). HRMS *m/z* of **2am**: Calcd for C<sub>10</sub>H<sub>8</sub>DNO [M+H]<sup>+</sup>: 161.0820; Found: 161.0818.

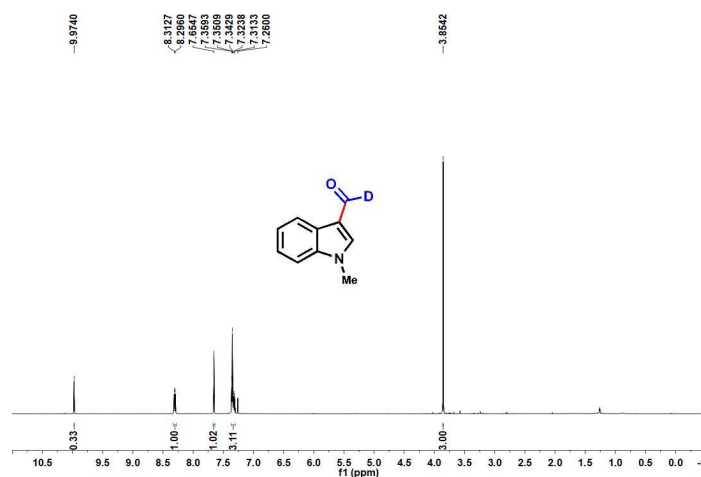

**Fig. S5** <sup>1</sup>H NMR spectrum of the isotope labeling experiment with CD<sub>3</sub>OD.

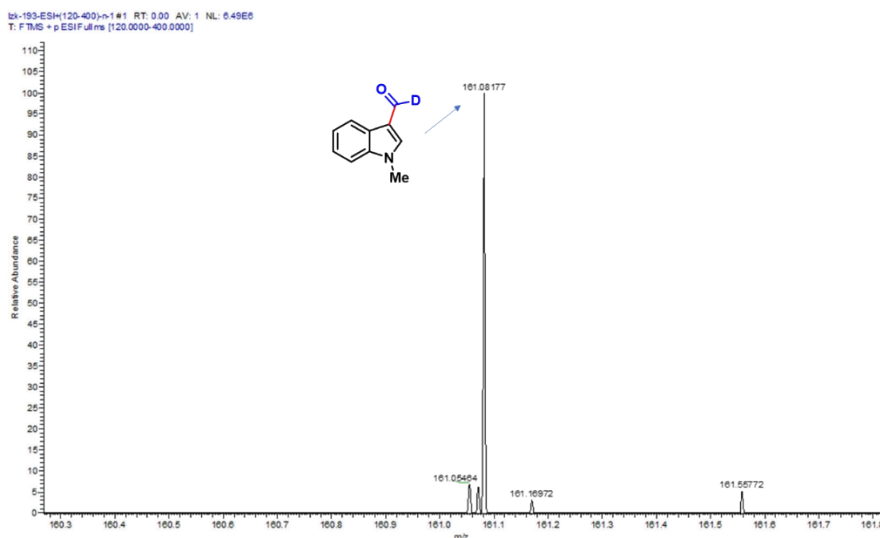

**Fig. S6** HRMS spectrum of the isotope labeling experiment with CD<sub>3</sub>OD.

#### 4.2.2. Detection of intermediates



The reaction intermediate was proved with by HRMS. Under the optimal conditions, using the model reaction of **1a** reacted with CD<sub>3</sub>OD, the intermediate **IV'** was obtained (Fig. S7). HRMS *m/z*: Calcd for C<sub>17</sub>H<sub>22</sub>DN<sub>2</sub><sup>+</sup> [M]<sup>+</sup>: 256.1919; Found: 256.1911. As a comparison, when **1a** reacted with CH<sub>3</sub>OH, the intermediate **IV** was obtained (Fig. S8). HRMS *m/z*: Calcd for C<sub>17</sub>H<sub>23</sub>N<sub>2</sub><sup>+</sup> [M]<sup>+</sup>: 255.1856; Found: 255.1850.

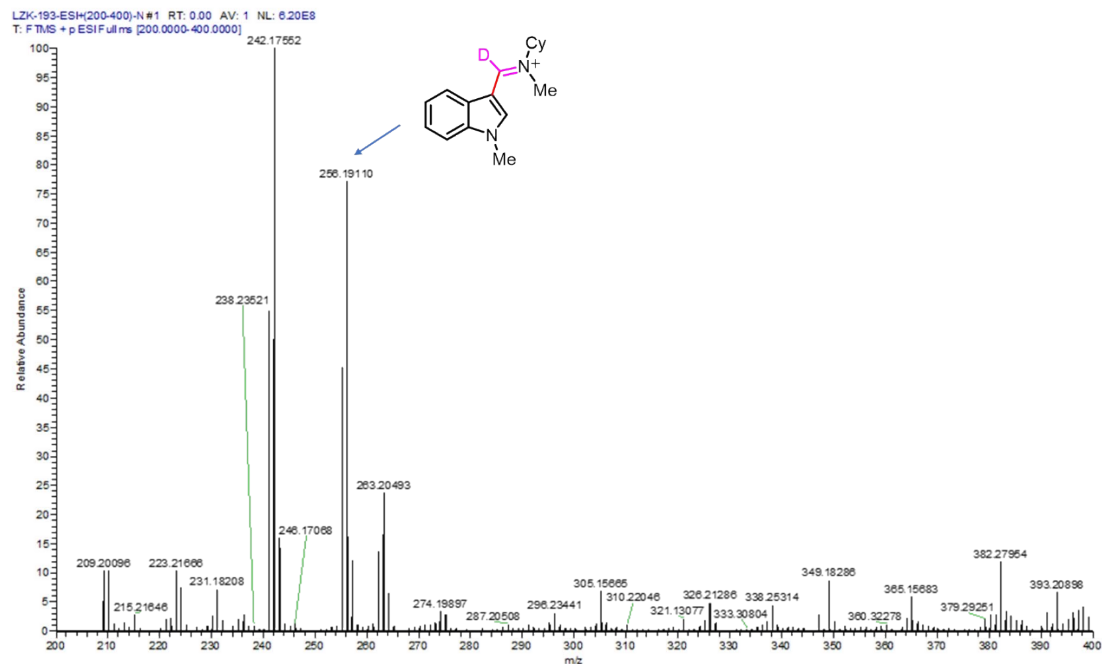

**Fig. S7** HRMS spectrum of the intermediate **IV'**.

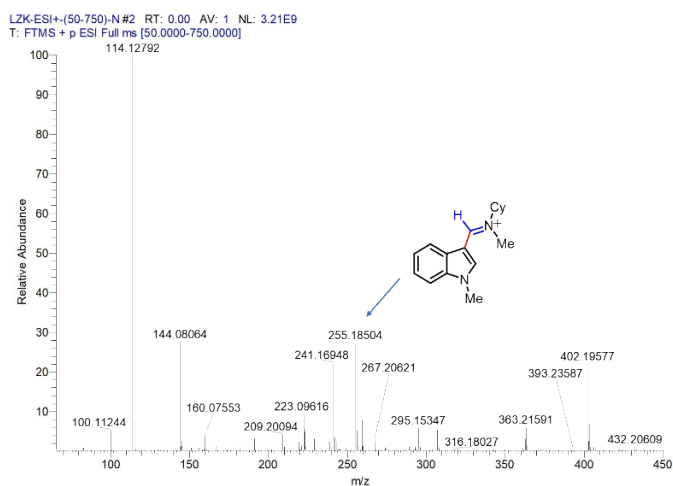

**Fig. S8** HRMS spectrum of the intermediate **IV**.

#### 4.2.3. Isotope labeling experiment with H<sub>2</sub><sup>18</sup>O

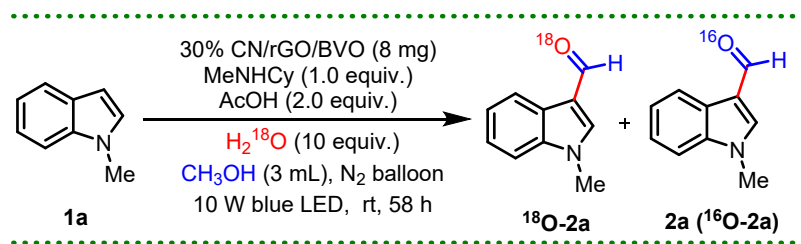

A mixture of 1-methyl-1H-indole **1a** (50  $\mu\text{L}$ , 0.4 mmol), 30% CN/rGO/BVO (8 mg), MeNHCy (53  $\mu\text{L}$ , 0.4 mmol), AcOH (48  $\mu\text{L}$ , 0.8 mmol, purity of 99.7%), dry  $\text{CH}_3\text{OH}$  (3 mL, purity of 99.9%) and  $\text{H}_2^{18}\text{O}$  (73  $\mu\text{L}$ , 4.0 mmol) were added to a 10 mL reaction tube. The reaction tube was purged with nitrogen for 5 min to exclude air inside the tube. Then, the mixture was stirred at room temperature for 58 h under 10 W blue LED irradiation with  $\text{N}_2$  atmosphere. After the reaction finished, the photocatalyst was separated by centrifugation (4,000 rpm, 3 min) and washed with EtOAc (3 $\times$ 10 mL). The combined organic phase was dried over anhydrous  $\text{MgSO}_4$ , filtered, and evaporated under reduced pressure. The residue was purified by silica gel column chromatography (eluent: petroleum ether (60-90  $^\circ\text{C}$ )/EtOAc = 5:1, v/v) to afford the products. The products were analyzed by HRMS (Fig. S9). HRMS  $m/z$  of  $^{18}\text{O}$ -**2a**: Calcd for  $\text{C}_{10}\text{H}_{10}\text{N}^{18}\text{O}$   $[\text{M}+\text{H}]^+$ : 162.0799; Found: 162.0796. HRMS  $m/z$  of  $^{16}\text{O}$ -**2a**: Calcd for  $\text{C}_{10}\text{H}_{10}\text{N}^{16}\text{O}$   $[\text{M}+\text{H}]^+$ : 160.0757; Found: 160.0754. The ratio of  $^{18}\text{O}$ -**2a** and  $^{16}\text{O}$ -**2a** in HRMS is 1.8:1.

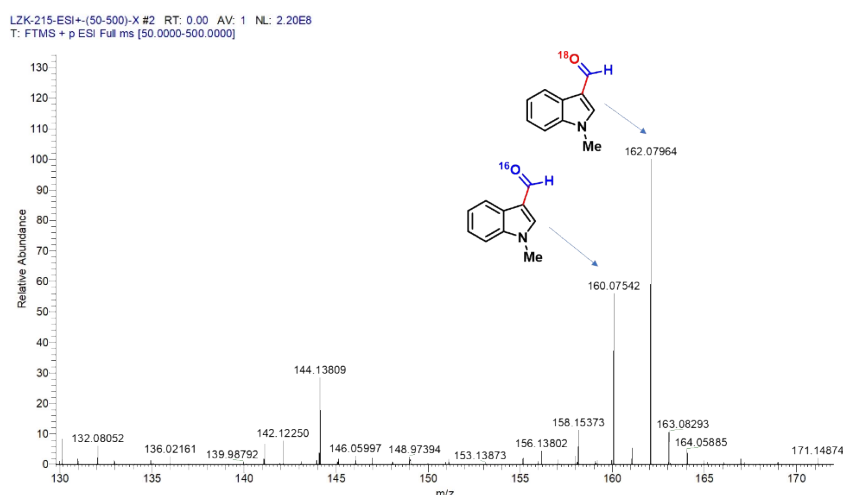

**Fig. S9** HRMS spectrum of the  $^{18}\text{O}$ -**2a** and  $^{16}\text{O}$ -**2a**.

### 4.3. Quenching experiments

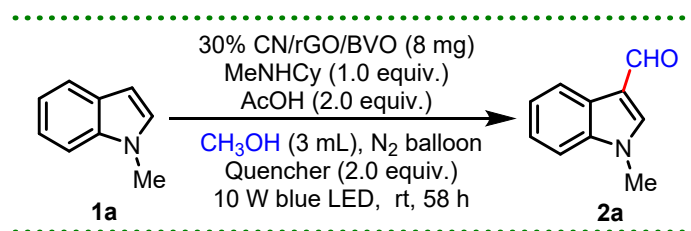

A mixture of 1-methyl-1H-indole **1a** (50  $\mu$ L, 0.4 mmol), 30% CN/rGO/BVO (8 mg), MeNHCy (53  $\mu$ L, 0.4 mmol), AcOH (48  $\mu$ L, 0.8 mmol), quencher (e.g. CuCl<sub>2</sub>, AgNO<sub>3</sub>, KI, (NH<sub>4</sub>)<sub>2</sub>C<sub>2</sub>O<sub>4</sub>, TEOA, TEMPO, or BHT) (0.8 mmol) and CH<sub>3</sub>OH (3 mL) were added to a 10 mL reaction tube. The reaction tube was purged with nitrogen for 5 min to exclude air inside the tube. Then, the mixture was stirred at room temperature for 58 h under 10 W blue LED irradiation with N<sub>2</sub> atmosphere. After the reaction finished, the photocatalyst was separated by centrifugation (4,000 rpm, 3 min) and washed with EtOAc (3  $\times$  10 mL). The combined organic phase was dried over anhydrous MgSO<sub>4</sub>, filtered, and evaporated under reduced pressure. The residue was purified by silica gel column chromatography (eluent: petroleum ether (60-90  $^{\circ}$ C)/EtOAc = 5:1, v/v). The BHT-trapped product was detected by HRMS analysis (Fig. S10). HRMS  $m/z$ : Calcd for C<sub>16</sub>H<sub>24</sub>O<sub>2</sub>K [M+K]<sup>+</sup>: 287.1408; Found: 287.1421.

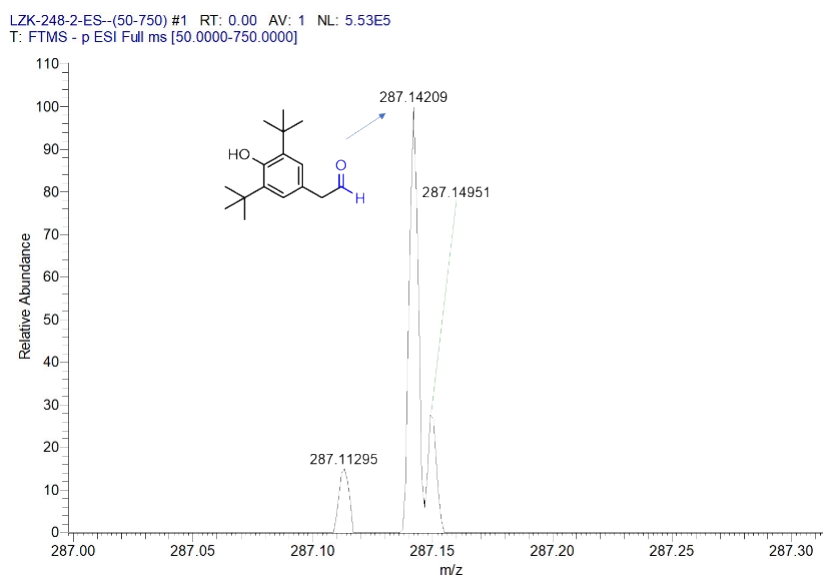

**Fig. S10** HRMS spectrum of the BHT trapping experiment.

#### 4.4. H<sub>2</sub> detection experiment

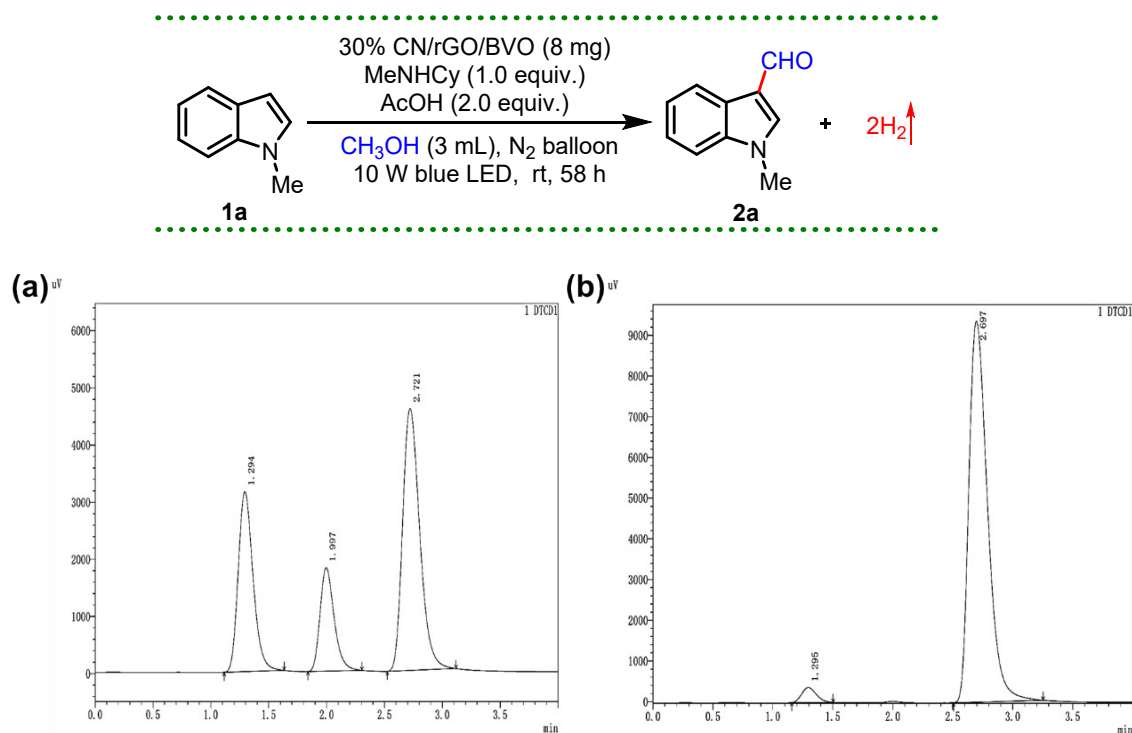

**Fig. S11** H<sub>2</sub> detection experiment by GC.

In order to demonstrate the H<sub>2</sub> evolution during this photochemical formylation procedure, the model reaction of 1-methyl-1H-indole (**1a**) with methanol was detected by GC under standard conditions. As a standard, we first tested the retention time of a mixture of hydrogen, oxygen, and nitrogen at 1.294, 1.997, and 2.721 min, respectively (Fig. S11a). Then, we tested the gas in the reaction tube, and the retention time of H<sub>2</sub> at 1.295 min was observed (Fig. S11b).

#### 4.5. Conversion of **5** to **2a**

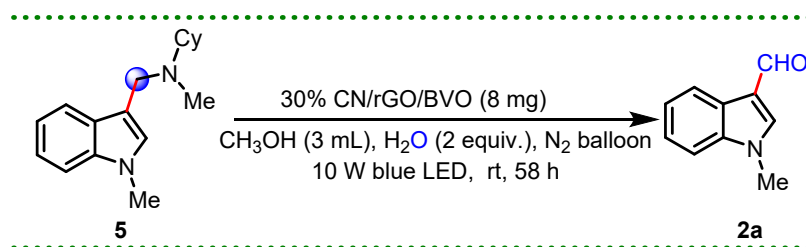

A mixture of **5** (102.6 mg, 0.4 mmol), 30% CN/rGO/BVO (8 mg), CH<sub>3</sub>OH (3 mL) and H<sub>2</sub>O (15  $\mu$ L, 2 equiv.) was added to a 10 mL reaction tube. The reaction tube was purged with nitrogen for 5 min to exclude air inside the tube. Then, the mixture was

stirred at room temperature for 58 h under 10 W blue LED irradiation with N<sub>2</sub> atmosphere. After the reaction finished, the photocatalyst was separated by centrifugation (4,000 rpm, 3 min) and washed with EtOAc (3×10 mL). The combined organic phase was dried over anhydrous MgSO<sub>4</sub>, filtered, and evaporated under reduced pressure. The residue was purified by silica gel column chromatography (eluent: petroleum ether (60-90 °C)/EtOAc = 5:1, v/v) to afford the product **2a** in 89% yield.

## 5. Reusability of photocatalyst

Reusability of 30% CN/rGO/BVO was investigated using the model reaction under the optimal conditions. After each cycle, 30% CN/rGO/BVO photocatalyst was separated from the reaction mixture by centrifugation (4000 rpm, 3 min) and washed with EtOAc (3×10 mL). The photocatalyst was obtained by vacuum drying at 60 °C for 12 h and used for next cycle. The photocatalyst after the fifth cycle was characterized by XRD.

## 6. Spectral Data

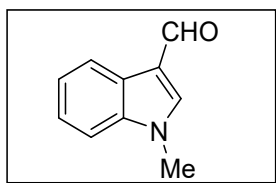

**1-Methyl-1H-indole-3-carbaldehyde (2a)**<sup>[6]</sup>: Known compound. 52.2 mg, 82% yield. Beige solid. m.p.: 68.2-69.9 °C. <sup>1</sup>H NMR (400 MHz, CDCl<sub>3</sub>): δ 9.93 (s, 1H), 8.30-8.28 (m, 1H), 7.61 (s, 1H), 7.34-7.29 (3H), 3.81 (s, 3H). <sup>13</sup>C NMR (100 MHz, CDCl<sub>3</sub>) δ 184.5, 139.5, 137.9, 125.2, 124.1, 123.0, 122.0, 118.0, 110.0, 33.7. HRMS (ESI) *m/z* Calcd for C<sub>10</sub>H<sub>9</sub>ON [M+H]<sup>+</sup>: 160.0757; Found: 160.0756.

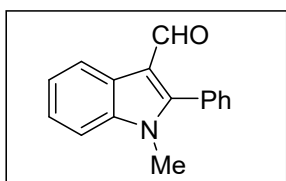

**1-Methyl-2-phenyl-1H-indole-3-carbaldehyde (2b)**<sup>[7]</sup>: Known compound. 64.0 mg,

68% yield. Yellow solid. m.p.: 124.6-126.6 °C.  $^1\text{H NMR}$  (400 MHz,  $\text{CDCl}_3$ )  $\delta$  9.74 (s, 1H), 8.45-8.42 (m, 1H), 7.57-7.55 (m, 3H), 7.50-7.48 (m, 2H), 7.43-7.35 (m, 3H), 3.68 (s, 3H).  $^{13}\text{C NMR}$  (100 MHz,  $\text{CDCl}_3$ )  $\delta$  186.8, 151.6, 137.5, 131.0, 130.0, 128.8, 128.7, 125.3, 124.2, 123.4, 122.3, 115.8, 109.9, 31.1.

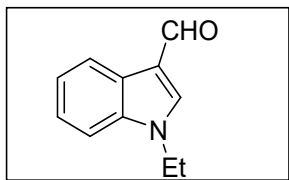

**1-Ethyl-1H-indole-3-carbaldehyde (2c)**<sup>[7]</sup>: Known compound. 45.0 mg, 65% yield. Beige solid. m.p.: 103.6-105.0 °C.  $^1\text{H NMR}$  (400 MHz,  $\text{CDCl}_3$ )  $\delta$  9.99 (s, 1H), 8.34-8.28 (m, 1H), 7.74 (s, 1H), 7.40-7.31 (m, 3H), 4.23 (q,  $J = 7.3$  Hz, 2H), 1.55 (t,  $J = 7.3$  Hz, 3H).  $^{13}\text{C NMR}$  (100 MHz,  $\text{CDCl}_3$ )  $\delta$  184.6, 137.6, 137.1, 125.6, 124.0, 123.0, 122.3, 118.3, 110.1, 42.0, 15.2.

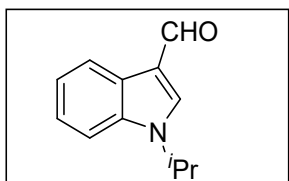

**1-Isopropyl-1H-indole-3-carbaldehyde (2d)**<sup>[7]</sup>: Known compound. 53.9 mg, 72% yield. Beige solid. m.p.: 90.6-93.2 °C.  $^1\text{H NMR}$  (400 MHz,  $\text{CDCl}_3$ )  $\delta$  10.00 (s, 1H), 8.32 (d,  $J = 6.5$  Hz, 1H), 7.84 (s, 1H), 7.43-7.32 (m, 3H), 4.70 (sept,  $J = 6.5$  Hz, 1H), 1.59 (d,  $J = 6.4$  Hz, 6H).  $^{13}\text{C NMR}$  (100 MHz,  $\text{CDCl}_3$ )  $\delta$  184.6, 137.0, 134.8, 125.6, 123.9, 123.0, 122.2, 118.3, 110.3, 48.2, 22.7.

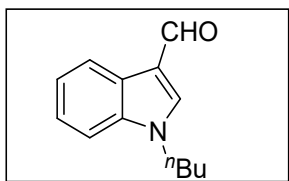

**1-Butyl-1H-indole-3-carbaldehyde (2e)**<sup>[8]</sup>: Known compound. 45.9 mg, 57% yield. Beige solid. m.p.: 102.6-104.3 °C.  $^1\text{H NMR}$  (400 MHz,  $\text{CDCl}_3$ )  $\delta$  10.00 (s, 1H), 8.32-8.30 (m, 1H), 7.72 (s, 1H), 7.40-7.29 (m, 3H), 4.18 (t,  $J = 7.1$  Hz, 2H), 1.90-1.87 (m, 2H), 1.43-1.33 (m, 2H), 0.97 (t,  $J = 7.3$  Hz, 3H).  $^{13}\text{C NMR}$  (100 MHz,  $\text{CDCl}_3$ )  $\delta$  184.6, 138.4, 137.4, 125.6, 124.0, 123.0, 122.3, 118.2, 110.2, 47.2, 31.9, 20.2, 13.7.

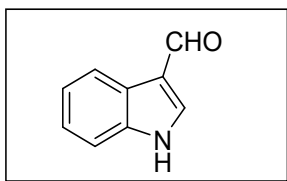

**1H-Indole-3-carbaldehyde (2f)**<sup>[8]</sup>: Known compound. 31.9 mg, 55% yield. Yellow solid. m.p.: 196.5-197.8 °C. **<sup>1</sup>H NMR** (400 MHz, DMSO-*d*<sub>6</sub>) δ 12.12 (s, 1H), 9.93 (s, 1H), 8.28 (d, *J* = 3.1 Hz, 1H), 8.09 (d, *J* = 7.0 Hz, 1H), 7.52-7.50 (m, 1H), 7.28-7.19 (m, 1H). **<sup>13</sup>C NMR** (100 MHz, DMSO-*d*<sub>6</sub>) δ 185.0, 138.5, 137.1, 124.1, 123.5, 122.1, 120.8, 118.2, 112.4.

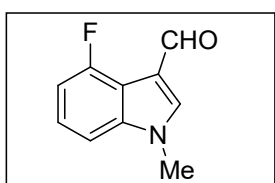

**4-Fluoro-1-methyl-1H-indole-3-carbaldehyde (2h)**<sup>[9]</sup>: Known compound. 36.9 mg, 52% yield. Yellow solid, m.p.: 67.2-69.1 °C. **<sup>1</sup>H NMR** (400 MHz, CDCl<sub>3</sub>) δ 10.19 (s, 1H), 7.80 (s, 1H), 7.27-7.22 (m, 1H), 7.17 (d, *J* = 8.1 Hz, 1H), 6.99 (dd, *J* = 10.2, 8.3 Hz, 1H), 3.87 (s, 3H). **<sup>13</sup>C NMR** (100 MHz, CDCl<sub>3</sub>) δ 185.2 (d, *J*<sub>C-F</sub> = 3.0 Hz), 157.0 (d, *J*<sub>C-F</sub> = 248.0 Hz), 140.1 (d, *J*<sub>C-F</sub> = 11.0 Hz), 134.9, 124.0 (d, *J*<sub>C-F</sub> = 8.0 Hz), 116.7 (d, *J*<sub>C-F</sub> = 5.0 Hz), 115.2 (d, *J*<sub>C-F</sub> = 22.0 Hz), 108.1 (d, *J*<sub>C-F</sub> = 20.0 Hz), 106.6 (d, *J*<sub>C-F</sub> = 4.0 Hz), 34.2.

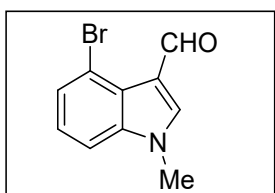

**4-Bromo-1-methyl-1H-indole-3-carbaldehyde (2i)**<sup>[10]</sup>: Known compound. 45.7 mg, 48% yield. Yellow solid, m.p.: 135.8-138.2 °C. **<sup>1</sup>H NMR** (400 MHz, CDCl<sub>3</sub>) δ 10.86 (s, 1H), 7.96 (s, 1H), 7.50 (d, *J* = 7.4 Hz, 1H), 7.35 (d, *J* = 8.0 Hz, 1H), 7.16 (t, *J* = 7.7 Hz, 1H), 3.87 (s, 3H). **<sup>13</sup>C NMR** (100 MHz, CDCl<sub>3</sub>) δ 186.1, 138.8, 135.3, 126.9, 126.2, 123.8, 118.2, 113.9, 109.7, 34.1.

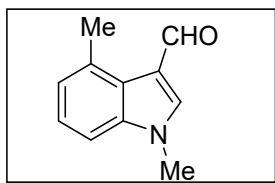

**1,4-Dimethyl-1H-indole-3-carbaldehyde (2j)**<sup>[11]</sup>: Known compound. 31.9 mg, 46% yield. Beige solid, m.p.: 75.2-77.0 °C. <sup>1</sup>H NMR (400 MHz, CDCl<sub>3</sub>) δ 10.10 (s, 1H), 7.77 (s, 1H), 7.25-7.18 (m, 2H), 7.09 (d, *J* = 6.8 Hz, 1H), 3.82 (s, 3H), 2.84 (s, 3H). <sup>13</sup>C NMR (100 MHz, CDCl<sub>3</sub>) δ 184.6, 138.6, 138.4, 132.4, 125.1, 124.3, 123.6, 119.6, 107.8, 33.9, 22.6.

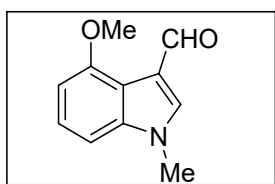

**4-Methoxy-1-methyl-1H-indole-3-carbaldehyde (2k)**<sup>[12]</sup>: Known compound. 47.7 mg, 63% yield. White solid, m.p.: 119.4-120.7°C. <sup>1</sup>H NMR (400 MHz, CDCl<sub>3</sub>) δ 10.44 (s, 1H), 7.78 (s, 1H), 7.24 (t, *J* = 8.2 Hz, 1H), 7.00 (dd, *J* = 8.2, 0.6 Hz, 1H), 6.73 (d, *J* = 7.8 Hz, 1H), 4.00 (s, 3H), 3.83 (s, 3H). <sup>13</sup>C NMR (100 MHz, CDCl<sub>3</sub>) δ 187.9, 154.7, 138.9, 132.2, 123.9, 118.2, 116.9, 103.5, 102.5, 55.5, 34.0.

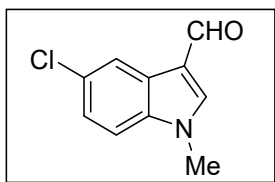

**5-Chloro-1-methyl-1H-indole-3-carbaldehyde (2l)**<sup>[11]</sup>: Known compound. 44.1 mg, 57% yield. Beige solid, m.p.: 177.3-178.7 °C. <sup>1</sup>H NMR (400 MHz, CDCl<sub>3</sub>) δ 9.94 (s, 1H), 8.29 (d, *J* = 1.8 Hz, 1H), 7.67 (s, 1H), 7.29 (dd, *J* = 8.7, 2.0 Hz, 1H), 7.26-7.24 (m, 1H), 3.86 (s, 3H). <sup>13</sup>C NMR (100 MHz, CDCl<sub>3</sub>) δ 184.3, 140.1, 136.3, 129.0, 126.2, 124.5, 121.7, 117.5, 111.0, 34.0.

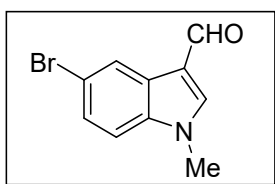

**5-Bromo-1-methyl-1H-indole-3-carbaldehyde (2m)**<sup>[7]</sup>: Known compound. 55.2 mg,



58% yield. Orange solid, m.p.: 123.8-126.0 °C.  $^1\text{H NMR}$  (400 MHz,  $\text{CDCl}_3$ )  $\delta$  9.93 (s, 1H), 8.44 (d,  $J = 1.9$  Hz, 1H), 7.64 (s, 1H), 7.42 (dd,  $J = 8.7, 1.9$  Hz, 1H), 7.20 (d,  $J = 8.7$  Hz, 1H), 3.85 (s, 3H).  $^{13}\text{C NMR}$  (100 MHz,  $\text{CDCl}_3$ )  $\delta$  184.3, 139.9, 136.6, 127.1, 126.7, 124.7, 117.4, 116.7, 111.4, 34.0.

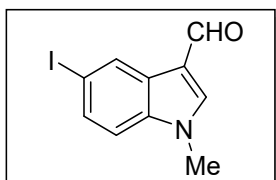

**5-Iodo-1-methyl-1H-indole-3-carbaldehyde (2n)**<sup>[13]</sup>: Known compound. 84.4 mg, 74% yield. Beige solid, m.p.: 128.8-130.7 °C.  $^1\text{H NMR}$  (400 MHz,  $\text{DMSO}-d_6$ )  $\delta$  9.87 (s, 1H), 8.43 (s, 1H), 8.24 (s, 1H), 7.58-7.42 (m, 2H), 3.86 (s, 3H).  $^{13}\text{C NMR}$  (100 MHz,  $\text{DMSO}-d_6$ )  $\delta$  184.6, 141.9, 136.9, 131.5, 129.2, 126.9, 115.9, 113.5, 87.1, 33.5.

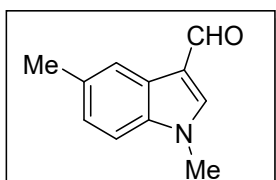

**5-Methyl-1-methyl-1H-indole-3-carbaldehyde (2o)**<sup>[7]</sup>: Known compound. 43.0 mg, 62% yield. Brown solid, m.p.: 119.0-121.3 °C.  $^1\text{H NMR}$  (400 MHz,  $\text{CDCl}_3$ )  $\delta$  9.94 (s, 1H), 8.11 (s, 1H), 7.61 (s, 1H), 7.24 (d,  $J = 8.4$  Hz, 1H), 7.17 (dd,  $J = 8.4, 1.4$  Hz, 1H), 3.83 (s, 3H), 2.49 (s, 3H).  $^{13}\text{C NMR}$  (100 MHz,  $\text{CDCl}_3$ )  $\delta$  184.6, 139.5, 136.4, 132.8, 125.6, 125.5, 121.9, 117.7, 109.6, 33.8, 21.5.

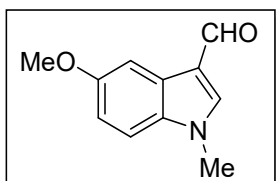

**5-Methoxy-1-methyl-1H-indole-3-carbaldehyde (2p)**<sup>[12]</sup>: Known compound. 65.8 mg, 87% yield. White solid, m.p.: 106.7-108.0 °C.  $^1\text{H NMR}$  (400 MHz,  $\text{CDCl}_3$ )  $\delta$  9.94 (s, 1H), 7.79 (d,  $J = 2.5$  Hz, 1H), 7.62 (s, 1H), 7.24 (d,  $J = 8.9$  Hz, 1H), 6.98 (dd,  $J = 8.9, 2.5$  Hz, 1H), 3.90 (s, 3H), 3.84 (s, 3H).  $^{13}\text{C NMR}$  (100 MHz,  $\text{CDCl}_3$ )  $\delta$  184.5, 156.8, 139.4, 132.9, 126.1, 117.9, 114.6, 110.8, 103.4, 55.9, 34.0.

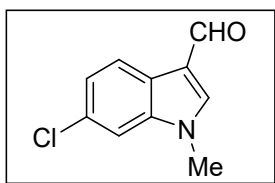

**6-Chloro-1-methyl-1H-indole-3-carbaldehyde (2q)**<sup>[12]</sup>: Known compound. 50.3 mg, 65% yield. Yellow solid, m.p.: 104.7-107.1 °C. <sup>1</sup>H NMR (400 MHz, CDCl<sub>3</sub>) δ 9.96 (s, 1H), 8.22 (d, *J* = 7.8 Hz, 1H), 7.59 (s, 1H), 7.26 (dd, *J* = 7.7, 0.8 Hz, 1H), 7.18 (t, *J* = 7.8 Hz, 1H), 4.19 (s, 3H). <sup>13</sup>C NMR (100 MHz, CDCl<sub>3</sub>) δ 184.2, 141.6, 133.1, 128.2, 125.5, 123.7, 120.7, 117.5, 37.9.

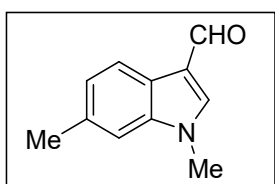

**6-Methyl-1-methyl-1H-indole-3-carbaldehyde (2r)**<sup>[12]</sup>: Known compound. 44.3 mg, 64% yield. Beige solid, m.p.: 106.3-108.0 °C. <sup>1</sup>H NMR (400 MHz, CDCl<sub>3</sub>) δ 9.91 (s, 1H), 8.16 (d, *J* = 7.8 Hz, 1H), 7.55 (s, 1H), 7.16-7.12 (m, 2H), 3.79 (s, 3H), 2.50 (s, 3H). <sup>13</sup>C NMR (100 MHz, CDCl<sub>3</sub>) δ 184.4, 139.1, 138.4, 134.2, 124.6, 123.0, 121.7, 118.1, 109.9, 33.6, 22.0.

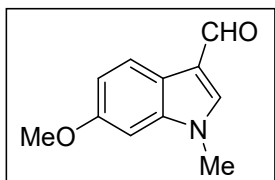

**6-Methoxy-1-methyl-1H-indole-3-carbaldehyde (2s)**<sup>[12]</sup>: Known compound. 62.8 mg, 83% yield. Beige solid, m.p.: 123.0-124.8 °C. <sup>1</sup>H NMR (400 MHz, CDCl<sub>3</sub>) δ 9.87 (s, 1H), 8.14 (d, *J* = 8.7 Hz, 1H), 7.51 (s, 1H), 6.94 (dd, *J* = 8.7, 2.2 Hz, 1H), 6.74 (d, *J* = 2.0 Hz, 1H), 3.86 (s, 3H), 3.76 (s, 3H). <sup>13</sup>C NMR (100 MHz, CDCl<sub>3</sub>) δ 184.4, 157.8, 138.9, 138.9, 122.8, 119.2, 118.2, 112.2, 93.7, 55.8, 33.7.

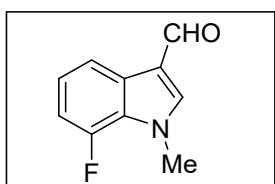

**7-Fluoro-1-methyl-1H-indole-3-carbaldehyde (2t)**<sup>[14]</sup>: Known compound. 54.6 mg,

77% yield. Beige solid, m.p.: 89.8-92.2°C.  $^1\text{H NMR}$  (400 MHz,  $\text{DMSO-}d_6$ )  $\delta$  9.90 (s, 1H), 8.26 (s, 1H), 7.91 (d,  $J = 7.4$  Hz, 1H), 7.20-7.08 (m, 2H), 4.03 (s, 3H).  $^{13}\text{C NMR}$  (100 MHz,  $\text{DMSO-}d_6$ )  $\delta$  184.6, 149.6 (d,  $J_{\text{C-F}} = 243.0$  Hz), 142.8, 128.6 (d,  $J_{\text{C-F}} = 5.0$  Hz), 125.1 (d,  $J_{\text{C-F}} = 10.0$  Hz), 123.3 (d,  $J_{\text{C-F}} = 6.0$  Hz), 117.3, 117.2 (d,  $J_{\text{C-F}} = 4.0$  Hz), 109.3 (d,  $J_{\text{C-F}} = 17.0$  Hz), 36.3 (d,  $J_{\text{C-F}} = 5.0$  Hz).

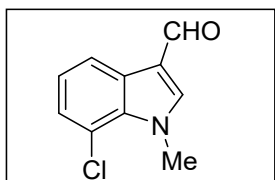

**7-Chloro-1-methyl-1H-indole-3-carbaldehyde (2u)**<sup>[15]</sup>: Known compound. 57.3 mg, 74% yield. Beige solid, m.p.: 149.3-151.0 °C.  $^1\text{H NMR}$  (400 MHz,  $\text{CDCl}_3$ )  $\delta$  9.88 (s, 1H), 8.15 (d,  $J = 8.4$  Hz, 1H), 7.57 (s, 1H), 7.26-7.22 (m, 2H), 3.76 (s, 3H).  $^{13}\text{C NMR}$  (100 MHz,  $\text{CDCl}_3$ )  $\delta$  184.3, 139.8, 138.3, 130.0, 123.7, 123.5, 122.9, 118.0, 110.1, 33.8.

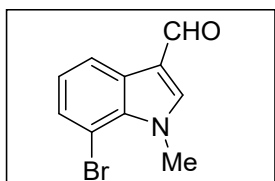

**7-Bromo-1-methyl-1H-indole-3-carbaldehyde (2v)**<sup>[16]</sup>: Known compound. 63.8 mg, 67% yield. Beige solid, m.p.: 105.7-108.1°C.  $^1\text{H NMR}$  (400 MHz,  $\text{CDCl}_3$ )  $\delta$  9.94 (s, 1H), 8.27 (d,  $J = 7.7$  Hz, 1H), 7.60 (s, 1H), 7.45 (d,  $J = 7.5$  Hz, 1H), 7.10 (t,  $J = 7.6$  Hz, 1H), 4.19 (s, 3H).  $^{13}\text{C NMR}$  (100 MHz,  $\text{CDCl}_3$ )  $\delta$  184.3, 141.8, 134.5, 129.2, 128.4, 124.2, 121.5, 117.4, 104.4, 38.2.

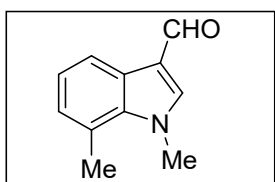

**1,7-Dimethyl-1H-indole-3-carbaldehyde (2w)**<sup>[12]</sup>: Known compound. 54.7 mg, 79% yield. Beige solid, m.p.: 112.4-114.3 °C.  $^1\text{H NMR}$  (400 MHz,  $\text{CDCl}_3$ )  $\delta$  9.96 (s, 1H), 8.17 (d,  $J = 7.9$  Hz, 1H), 7.55 (s, 1H), 7.17 (t,  $J = 7.4$  Hz, 1H), 7.05-7.03 (m, 1H), 4.11 (s, 3H), 2.76 (s, 3H).  $^{13}\text{C NMR}$  (100 MHz,  $\text{CDCl}_3$ )  $\delta$  184.4, 141.0, 136.6, 126.8, 126.4, 123.1, 121.9, 120.0, 117.5, 37.9, 19.5.

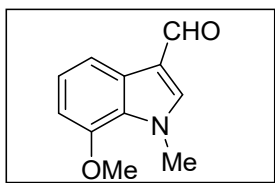

**7-Methoxy-1-methyl-1H-indole-3-carbaldehyde (2x)**<sup>[8]</sup>: Known compound. 67.4 mg, 89% yield. Beige solid, m.p.: 130.1-131.4°C. <sup>1</sup>H NMR (400 MHz, CDCl<sub>3</sub>) δ 9.96 (s, 1H), 7.87 (dd, *J* = 8.0, 0.8 Hz, 1H), 7.53 (s, 1H), 7.19 (t, *J* = 8.0 Hz, 1H), 6.74 (d, *J* = 7.9 Hz, 1H), 4.11 (s, 3H), 3.93 (s, 3H). <sup>13</sup>C NMR (100 MHz, CDCl<sub>3</sub>) δ 184.5, 147.8, 139.9, 127.8, 127.5, 123.8, 117.9, 114.4, 104.8, 55.5, 37.9.

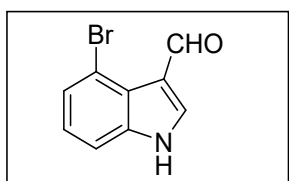

**4-Bromo-1H-indole-3-carbaldehyde (2y)**<sup>[17]</sup>: Known compound. 44.4 mg, 50% yield. Yellow solid, m.p.: 170.8-172.9°C. <sup>1</sup>H NMR (400 MHz, DMSO-*d*<sub>6</sub>) δ 12.56 (s, 1H), 10.69 (s, 1H), 8.30 (s, 1H), 7.56 (s, 1H), 7.43 (s, 1H), 7.14 (s, 1H). <sup>13</sup>C NMR (100 MHz, DMSO-*d*<sub>6</sub>) δ 184.6, 138.3, 133.7, 125.9, 124.7, 123.7, 117.9, 112.4, 112.3.

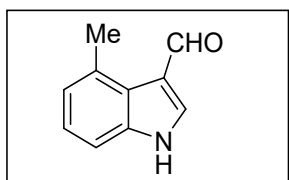

**4-Methyl-1H-indole-3-carbaldehyde (2z)**<sup>[18]</sup>: Known compound. 28.0 mg, 44% yield. Beige solid, m.p.: 183.2-185.1°C. <sup>1</sup>H NMR (400 MHz, DMSO-*d*<sub>6</sub>) δ 12.17 (s, 1H), 9.91 (s, 1H), 8.23 (s, 1H), 7.30 (s, 1H), 7.13 (s, 1H), 6.97 (s, 1H), 2.77 (s, 3H). <sup>13</sup>C NMR (100 MHz, DMSO-*d*<sub>6</sub>) δ 184.2, 139.0, 137.9, 131.2, 123.5, 123.4, 123.3, 119.8, 110.0, 22.2.

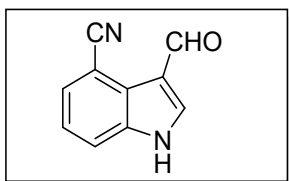

**4-Cyano-1H-indole-3-carbaldehyde (2aa)**<sup>[19]</sup>: Known compound. 32.0 mg, 47% yield. Yellow solid, m.p.: 215.4-218.0 °C. <sup>1</sup>H NMR (400 MHz, DMSO-*d*<sub>6</sub>) δ 12.74 (s,

1H), 10.19 (s, 1H), 8.50 (s, 1H), 7.88 (d,  $J = 8.2$  Hz, 1H), 7.72 (d,  $J = 7.4$  Hz, 1H), 7.41 (t,  $J = 7.8$  Hz, 1H).  $^{13}\text{C}$  NMR (100 MHz, DMSO- $d_6$ )  $\delta$  183.7, 138.4, 137.5, 129.0, 123.8, 123.3, 119.1, 118.2, 117.2, 102.1.

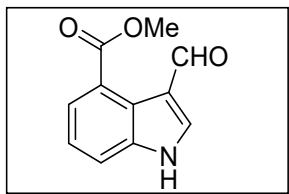

**4-carboxylic acid methyl ester-1H-indole-3-carbaldehyde (2ab)**<sup>[20]</sup>: Known compound. 55.3 mg, 68% yield. Yellow solid, m.p.: 133.6-135.0 °C.  $^1\text{H}$  NMR (400 MHz, DMSO- $d_6$ )  $\delta$  12.47 (s, 1H), 10.19 (s, 1H), 8.34 (s, 1H), 7.74 (d,  $J = 8.0$  Hz, 1H), 7.58 (d,  $J = 7.3$  Hz, 1H), 7.33 (t,  $J = 7.8$  Hz, 1H), 3.86 (s, 3H).  $^{13}\text{C}$  NMR (100 MHz, DMSO- $d_6$ )  $\delta$  186.2, 168.7, 137.9, 136.7, 124.7, 123.2, 122.4, 121.4, 118.2, 116.4, 51.9.

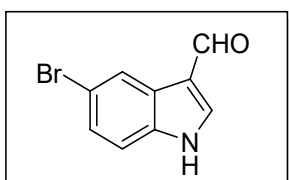

**5-Bromo-1H-indole-3-carbaldehyde (2ac)**<sup>[8]</sup>: Known compound. 48.4 mg, 54% yield. Beige solid, m.p.: 174.4-175.3 °C.  $^1\text{H}$  NMR (400 MHz, DMSO- $d_6$ )  $\delta$  12.30 (s, 1H), 9.93 (s, 1H), 8.35 (s, 1H), 8.22 (d,  $J = 2.0$  Hz, 1H), 7.49 (d,  $J = 8.6$  Hz, 1H), 7.40 (dd,  $J = 8.6, 2.0$  Hz, 1H).  $^{13}\text{C}$  NMR (100 MHz, DMSO- $d_6$ )  $\delta$  185.3, 139.4, 135.8, 126.2, 126.0, 123.0, 117.5, 114.9, 114.7.

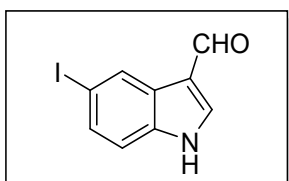

**5-Iodo-1H-indole-3-carbaldehyde (2ad)**<sup>[20]</sup>: Known compound. 73.7 mg, 68% yield. Beige solid, m.p.: 223.6-225.2 °C.  $^1\text{H}$  NMR (400 MHz, DMSO- $d_6$ )  $\delta$  12.27 (s, 1H), 9.92 (s, 1H), 8.44 (d,  $J = 1.4$  Hz, 1H), 8.29 (s, 1H), 7.53 (dd,  $J = 8.5, 1.7$  Hz, 1H), 7.37 (d,  $J = 8.5$  Hz, 1H).  $^{13}\text{C}$  NMR (100 MHz, DMSO- $d_6$ )  $\delta$  185.1, 138.9, 136.2, 131.5, 129.2, 126.6, 117.2, 114.9, 86.6.

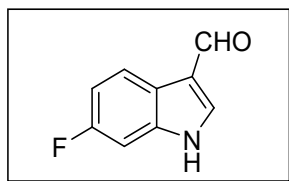

**6-Fluoro-1H-indole-3-carbaldehyde (2ae)**<sup>[17]</sup>: Known compound. 36.5 mg, 56% yield. Beige solid, m.p.: 203.2-204.4 °C. <sup>1</sup>H NMR (400 MHz, DMSO-*d*<sub>6</sub>) δ 12.16 (s, 1H), 9.92 (s, 1H), 8.30 (d, *J* = 3.0 Hz, 1H), 8.07 (dd, *J* = 8.7, 5.6 Hz, 1H), 7.33-7.29 (m, 1H), 7.08 (ddd, *J* = 9.8, 8.7, 2.4 Hz, 1H). <sup>13</sup>C NMR (100 MHz, DMSO-*d*<sub>6</sub>) δ 185.1, 159.6 (d, *J*<sub>C-F</sub> = 236.0 Hz), 139.2, 137.2 (d, *J*<sub>C-F</sub> = 13.0 Hz), 122.0 (d, *J*<sub>C-F</sub> = 10.0 Hz), 120.8, 118.1, 110.5 (d, *J*<sub>C-F</sub> = 23.0 Hz), 98.9 (d, *J*<sub>C-F</sub> = 25.0 Hz).

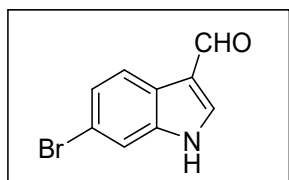

**6-Bromo-1H-indole-3-carbaldehyde (2af)**<sup>[21]</sup>: Known compound. 49.3 mg, 55% yield. Beige solid, m.p.: 198.2-199.7 °C. <sup>1</sup>H NMR (400 MHz, DMSO-*d*<sub>6</sub>) δ 12.21 (s, 1H), 9.94 (s, 1H), 8.32 (s, 1H), 8.02 (d, *J* = 8.4 Hz, 1H), 7.71 (d, *J* = 1.4 Hz, 1H), 7.36 (dd, *J* = 8.4, 1.6 Hz, 1H). <sup>13</sup>C NMR (100 MHz, DMSO-*d*<sub>6</sub>) δ 185.1, 139.2, 137.9, 125.1, 123.2, 122.5, 118.0, 115.9, 115.2.

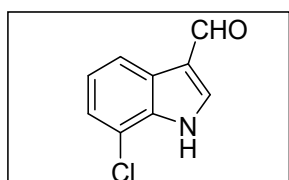

**7-Chloro-1H-indole-3-carbaldehyde (2ag)**<sup>[22]</sup>: Known compound. 51.7 mg, 72% yield. Beige solid, m.p.: 180.0-181.2 °C. <sup>1</sup>H NMR (400 MHz, DMSO-*d*<sub>6</sub>) δ 12.54 (s, 1H), 9.97 (s, 1H), 8.38 (s, 1H), 8.06 (d, *J* = 7.8 Hz, 1H), 7.35 (dd, *J* = 7.7, 0.7 Hz, 1H), 7.23 (t, *J* = 7.8 Hz, 1H). <sup>13</sup>C NMR (100 MHz, DMSO-*d*<sub>6</sub>) δ 185.4, 139.2, 133.9, 126.0, 123.3, 123.1, 119.8, 118.9, 116.7.

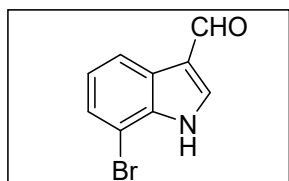

**7-Bromo-1*H*-indole-3-carbaldehyde (2ah)**<sup>[21]</sup>: Known compound. 35.8 mg, 64% yield. Beige solid, m.p.: 165.2-167.2 °C. <sup>1</sup>H NMR (400 MHz, DMSO-*d*<sub>6</sub>) δ 12.39 (s, 1H), 9.97 (s, 1H), 8.37 (s, 1H), 8.10 (dd, *J* = 7.8, 0.6 Hz, 1H), 7.49 (dd, *J* = 7.6, 0.6 Hz, 1H), 7.17 (t, *J* = 7.8 Hz, 1H). <sup>13</sup>C NMR (100 MHz, DMSO-*d*<sub>6</sub>) δ 185.4, 139.2, 135.5, 126.2, 125.8, 123.7, 120.3, 118.9, 104.8.

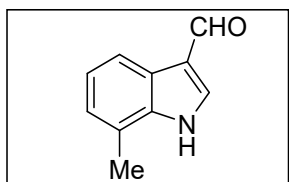

**7-Methyl-1*H*-indole-3-carbaldehyde (2ai)**<sup>[23]</sup>: Known compound. 41.4 mg, 65% yield. Yellow solid, m.p.: 201.7-203.8 °C. <sup>1</sup>H NMR (400 MHz, DMSO-*d*<sub>6</sub>) δ 12.15 (s, 1H), 9.94 (s, 1H), 8.29 (d, *J* = 3.2 Hz, 1H), 7.92 (d, *J* = 7.8 Hz, 1H), 7.12 (t, *J* = 7.3 Hz, 1H), 7.07-7.05 (m, 1H), 2.51 (s, 3H). <sup>13</sup>C NMR (100 MHz, DMSO-*d*<sub>6</sub>) δ 185.2, 138.3, 136.6, 124.1, 124.0, 122.5, 121.9, 118.6, 118.5, 16.8.

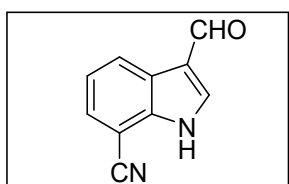

**7-Cyano-1*H*-indole-3-carbaldehyde (2aj)**<sup>[24]</sup>: Known compound. 33.4 mg, 49% yield. Beige solid, m.p.: 206.0-208.1 °C. <sup>1</sup>H NMR (400 MHz, DMSO-*d*<sub>6</sub>) δ 12.87 (s, 1H), 10.00 (s, 1H), 8.46 (s, 1H), 8.41 (dd, *J* = 8.0, 1.0 Hz, 1H), 7.77 (dd, *J* = 7.5, 1.0 Hz, 1H), 7.38 (t, *J* = 7.8 Hz, 1H). <sup>13</sup>C NMR (100 MHz, DMSO-*d*<sub>6</sub>) δ 185.5, 139.9, 136.6, 128.6, 126.4, 125.1, 122.4, 118.6, 116.6, 95.1.

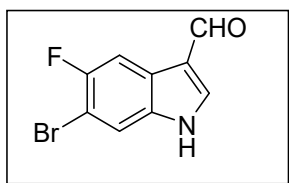

**6-Bromo-5-Fluoro-1*H*-indole-3-carbaldehyde (2ak)**<sup>[25]</sup>: Known compound. 66.8 mg, 69% yield. Yellow solid, m.p.: 251.6-253.5 °C. <sup>1</sup>H NMR (400 MHz, DMSO-*d*<sub>6</sub>) δ 12.26 (s, 1H), 9.92 (s, 1H), 8.36 (s, 1H), 7.88 (d, *J* = 9.1 Hz, 1H), 7.80 (d, *J* = 5.4 Hz, 1H). <sup>13</sup>C NMR (100 MHz, DMSO-*d*<sub>6</sub>) δ 185.0 (s), 155.4 (d, *J*<sub>C-F</sub> = 236.0 Hz), 140.0, 133.9, 124.0 (d, *J*<sub>C-F</sub> = 10.0 Hz), 118.0 (d, *J*<sub>C-F</sub> = 5.0 Hz), 116.6, 106.8 (d, *J*<sub>C-F</sub> = 25.0

Hz), 103.5 (d,  $J_{C-F} = 24.0$  Hz).

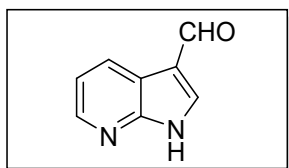

**1H-Pyrrolo[2,3-b]pyridine-3-carbaldehyde (2a)**<sup>[8]</sup>: Known compound. 25.1 mg, 43% yield. Beige solid, m.p.: 207.8-210.1 °C. <sup>1</sup>H NMR (400 MHz, DMSO-*d*<sub>6</sub>) δ 12.67 (s, 1H), 9.91 (s, 1H), 8.44 (s, 1H), 8.38 (d,  $J = 7.8$  Hz, 1H), 8.34 (d,  $J = 4.5$  Hz, 1H), 7.24 (dd,  $J = 7.8, 4.8$  Hz, 1H). <sup>13</sup>C NMR (100 MHz, DMSO-*d*<sub>6</sub>) δ 185.4, 149.4, 144.8, 138.7, 129.2, 118.4, 116.6, 116.5.

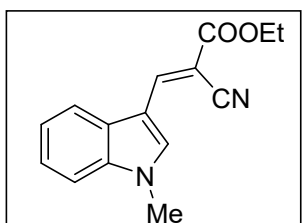

**Ethyl (E)-2-cyano-3-(1-methyl-1H-indol-3-yl)acrylate (3)**<sup>[26]</sup>: Known compound. 36.8 mg, 92% yield. Yellow solid, m.p.: 145.6-148.3 °C. <sup>1</sup>H NMR (400 MHz, CDCl<sub>3</sub>) δ 8.58 (s, 1H), 8.51 (s, 1H), 7.85-7.82 (m, 1H), 7.43-7.32 (m, 3H), 4.37 (q,  $J = 7.2$  Hz, 2H), 3.93 (s, 3H), 1.40 (t,  $J = 7.1$  Hz, 3H). <sup>13</sup>C NMR (100 MHz, CDCl<sub>3</sub>) δ 164.1, 146.0, 137.0, 134.8, 128.4, 124.0, 122.8, 118.6, 118.5, 110.5, 110.0, 93.8, 62.0, 34.1, 14.4. **HRMS** (ESI) *m/z* Calcd for C<sub>15</sub>H<sub>15</sub>N<sub>2</sub>O<sub>2</sub> [M+H]<sup>+</sup>: 255.1134; Found: 255.1126.

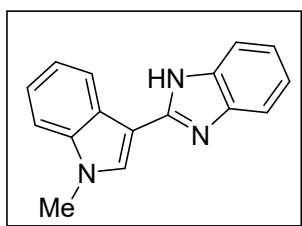

**2-(1-Methyl-1H-indol-3-yl)-1H-benzo[d]imidazole (4)**<sup>[27]</sup>: Known compound. 98.9 mg, 91% yield. Yellow solid, m.p.: 230.5-233.1 °C. <sup>1</sup>H NMR (400 MHz, DMSO-*d*<sub>6</sub>) δ 12.44 (s, 1H), 8.52 (d,  $J = 7.2$  Hz, 1H), 8.09 (s, 1H), 7.56-7.53 (m, 3H), 7.31-7.22 (m, 2H), 7.16-7.12 (m, 2H), 3.91 (s, 3H). <sup>13</sup>C NMR (100 MHz, DMSO-*d*<sub>6</sub>) δ 149.1, 137.0, 129.9, 125.5, 122.3, 121.5, 121.2, 120.4, 110.2, 105.7, 33.0.



## 7. References

- [1] D. L. Jiang, L. L. Chen, J. J. Zhu, M. Chen, W. D. Shi and J. M. Xie, *Dalton Trans.*, 2013, **42**, 15726-15734.
- [2] T. Wang, C. J. Li, J. Y. Ji, Y. J. Wei, P. Zhang, S. P. Wang, X. B. Fan and J. L. Gong, *ACS Sustainable Chem. Eng.*, 2014, **2**, 2253-2258.
- [3] D. C. Marcano, D. V. Kosynkin, J. M. Berlin, A. Sinitskii, Z. Sun, A. Slesarev, L. B. Alemany, W. Lu and J. M. Tour, *ACS Nano*, 2010, **4**, 4806-4814.
- [4] D. L. Jiang, P. Xiao, L. Q. Shao, D. Li and M. Chen, *Ind. Eng. Chem. Res.*, 2017, **56**, 8823-8832.
- [5] Q. K. Sun, W. Liu, S. A. Ying, L. L. Wang, S. F. Xue and W. J. Yang, *RSC Adv.*, 2015, **5**, 73046-73050.
- [6] L. Q. Yang, Z. R. Liu, Y. J. Li, N. Lei, Y. L. Shen and K. Zheng, *Org. Lett.*, 2019, **21**, 7702-7707.
- [7] X. Li, X. Y. Gu, Y. J. Li and P. X. Li, *ACS Catal.*, 2014, **4**, 1897-1900.
- [8] D. Z. Lin and J. M. Huang, *Org. Lett.*, 2019, **21**, 5862-5866.
- [9] M. Yan, R. C. Hider and Y. M. Ma, *Org. Chem. Front.*, 2019, **6**, 1168-1172.
- [10] H. D. Xu, K. Xu, Z. H. Jia, H. Zhou, P. Jiang, X. L. Lu, Y. P. Pan, H. Wu, Y. Ding, M. H. Shen and X. H. Pan, *Asian J. Org. Chem.*, 2014, **3**, 1154-1158.
- [11] W. J. Zhang, J. T. Tang, W. G. Yu, Q. Huang, Y. Fu, G. C. Kuang, C. Y. Pan and G. P. Yu, *ACS Catal.*, 2018, **8**, 8084-8091.
- [12] F. Ling, D. D. Cheng, T. Liu, L. Liu, Y. J. Li, J. Y. Li and W. H. Zhong, *Green Chem.*, 2021, **23**, 4107-4113.
- [13] Z. Y. Wang, R. L. Guo, X. L. Zhang, M. Y. Wang, G. N. Chen and Y. Q. Wang, *Org. Chem. Front.*, 2021, **8**, 1844-1850.
- [14] J. M. Berman, M. B. Schmid, J. D. Mendlein and N. Kaplan, *Pat. WO2004082586*, 2004.
- [15] D. W. Will, G. Reid, I. Charapitsa and J. Lewis, *Pat. WO2018229197*, 2018.
- [16] S. Devkota, S. Kim, S. Y. Yoo, S. Mohandoss, M.-H. Baik and Y. R. Lee, *Chem. Sci.*, 2021, **12**, 11427-11437.
- [17] Q. D. Wang, B. Zhou, J. M. Yang, D. Fang, J. M. Ren and B. B. Zeng, *Synlett*, 2017, **28**, 2670-2674.
- [18] Q. D. Wang, J. M. Yang, D. Fang, J. M. Ren and B. B. Zeng, *Tetrahedron Lett.*, 2017, **58**, 2877-

2880.

- [19] R. Micikas, A. Acharyya, F. Gai and A. B. Smith, *Org. Lett.*, 2021, **23**, 1247-1250.
- [20] W. L. Wu and W. P. Su, *J. Am. Chem. Soc.*, 2011, **133**, 11924-11927.
- [21] L. Lu, Q. H. Xiong, S. M. Guo, T. Q. He, F. Xu, J. H. Gong, Z. Zhu and H. Cai, *Tetrahedron*, 2015, **71**, 3637-3641.
- [22] A. Linkermann, M. Guetschow and C. Steinebach, *Pat.* EP3875086, 2021.
- [23] H. Y. Fei, J. T. Yu, Y. Jiang, H. Guo and J. Cheng, *Org. Biomol. Chem.*, 2013, **11**, 7092-7095.
- [24] J. L. Castro Pineiro, X. C. Lin, Q. Liu, K. Meng, F. Ren, D. Vesey and B. W. Zhao, *Pat.* WO2009153307, 2009.
- [25] T. M. Kamenecka, K. Greenman, L. Solt, Y. He, M. Lizarzaburu and B. C. Bookser, *Pat.* WO2021263278, 2021.
- [26] M. Venkatanarayana and P. K. Dubey, *Synth. Commun.*, 2012, **42**, 1746-1759.
- [27] Y. T. Wang, Y. J. Qin, N. Yang, Y. L. Zhang, C. H. Liu and H. L. Zhu, *Eur. J. Med. Chem.*, 2015, **99**, 125-137.

## 8. Copies of NMR spectra

### $^1\text{H}$ NMR of product 2a in $\text{CDCl}_3$ (400 MHz)

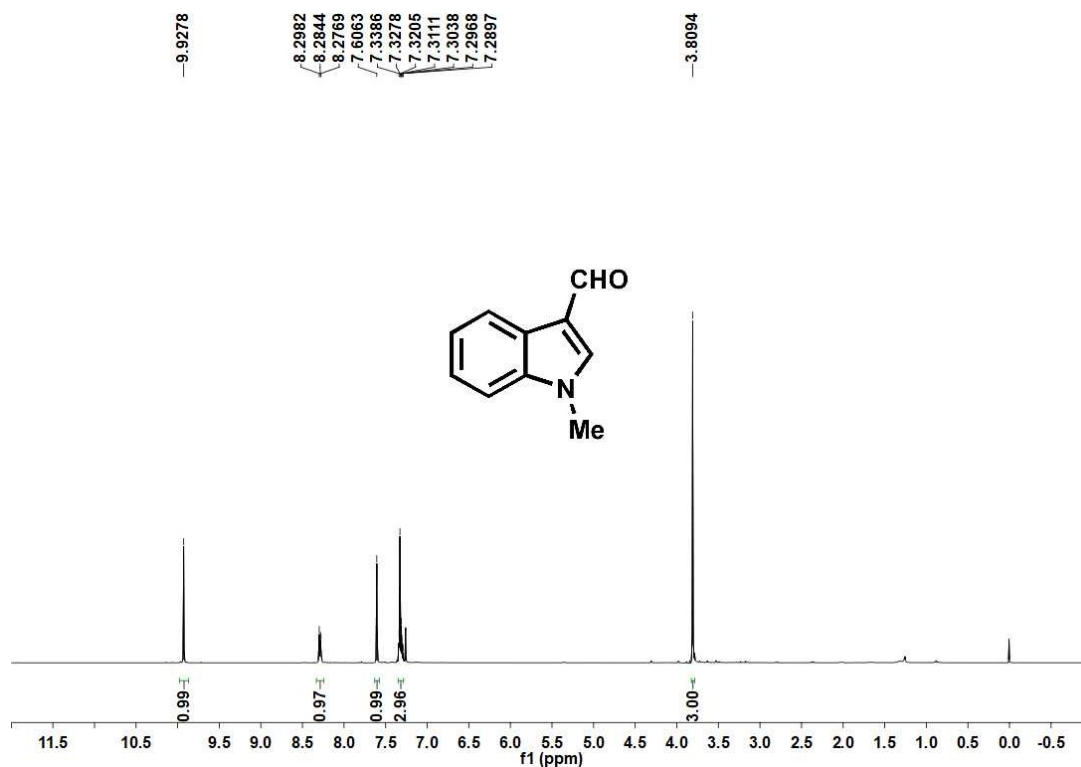

### $^{13}\text{C}$ NMR of product 2a in $\text{CDCl}_3$ (100 MHz)

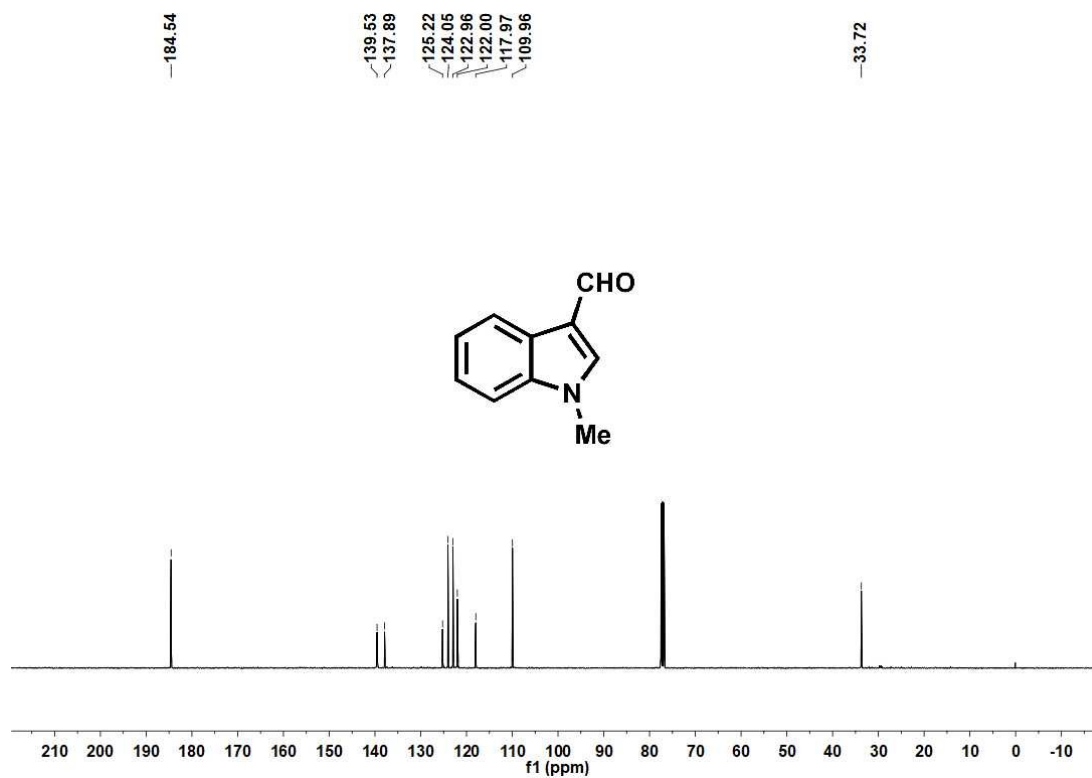

**<sup>1</sup>H NMR of product 2b in CDCl<sub>3</sub> (400 MHz)**

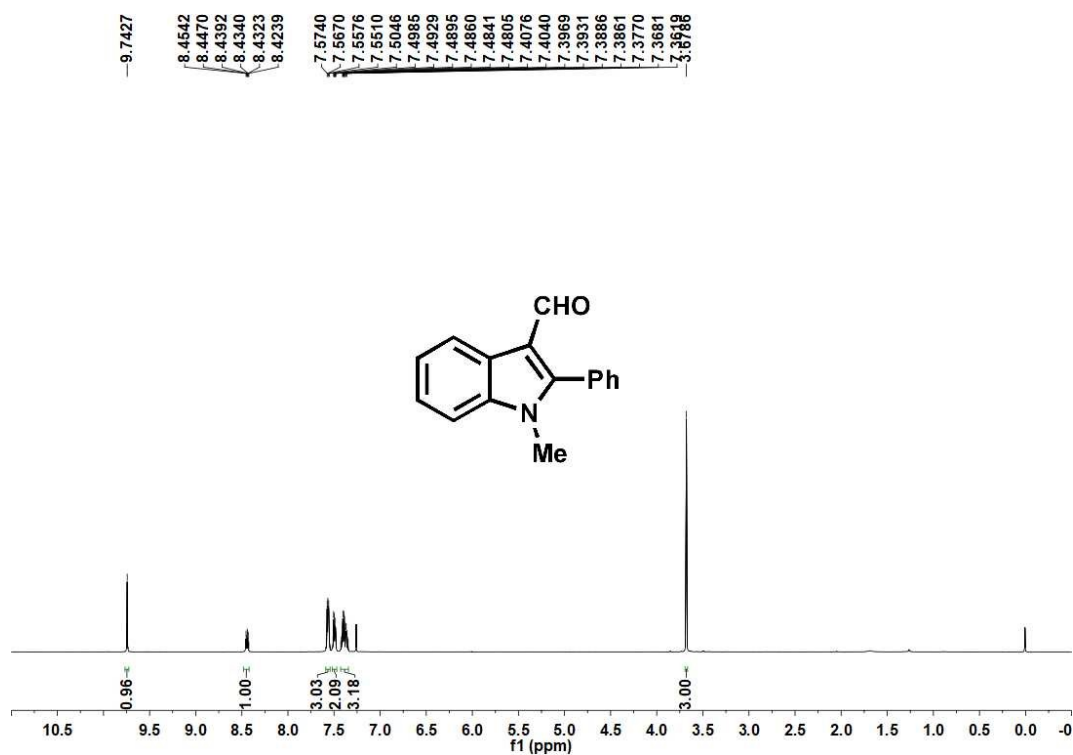

**<sup>13</sup>C NMR of product 2b in CDCl<sub>3</sub> (100 MHz)**

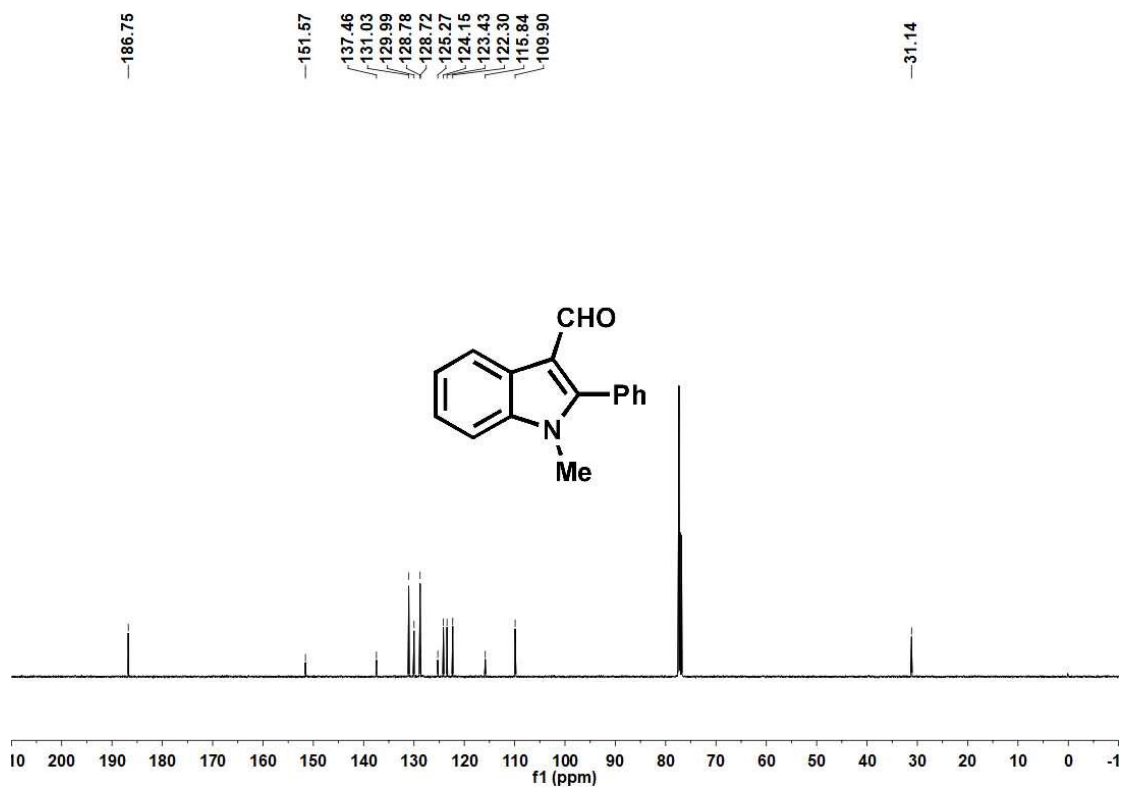

**$^1\text{H}$  NMR of product 2c in  $\text{CDCl}_3$  (400 MHz)**

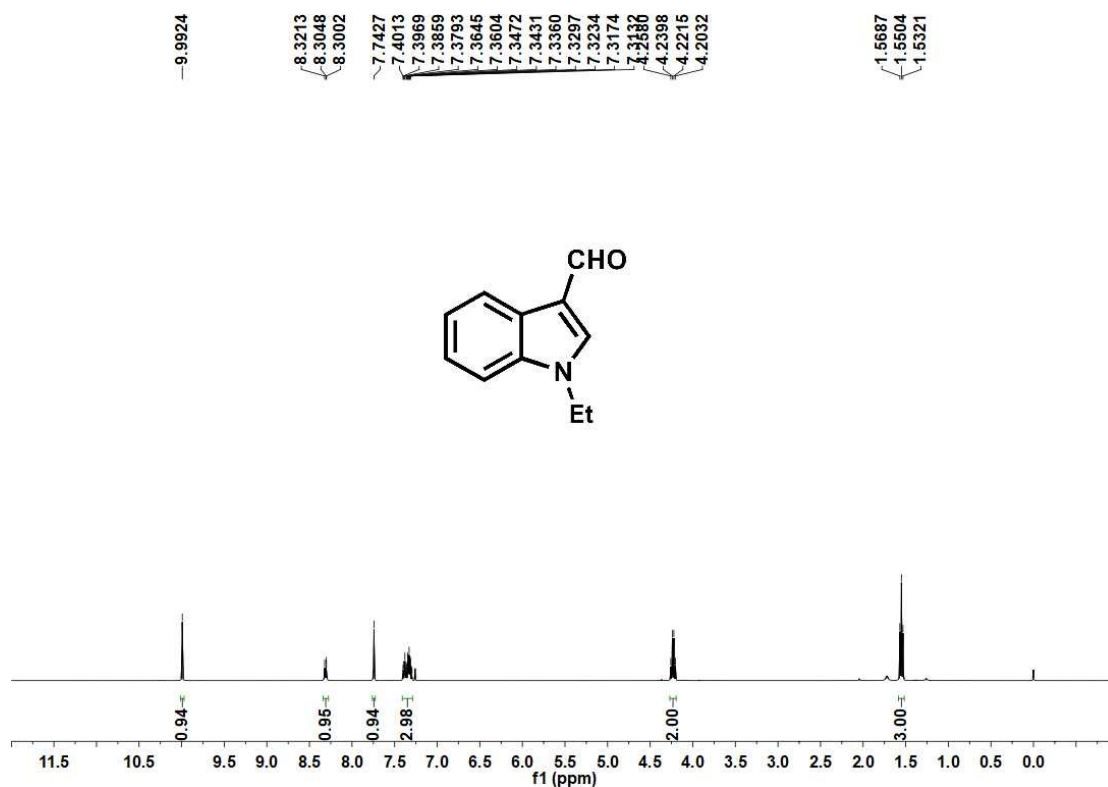

**$^{13}\text{C}$  NMR of product 2c in  $\text{CDCl}_3$  (100 MHz)**

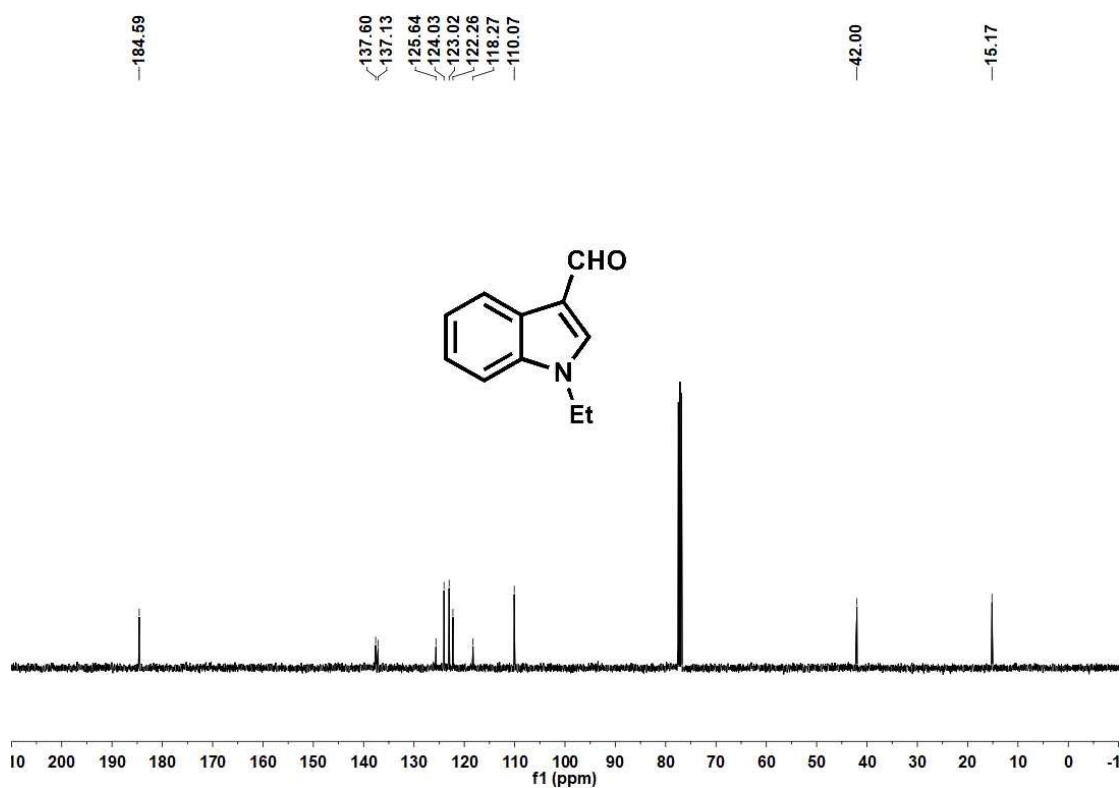

**$^1\text{H}$  NMR of product 2d in  $\text{CDCl}_3$  (400 MHz)**

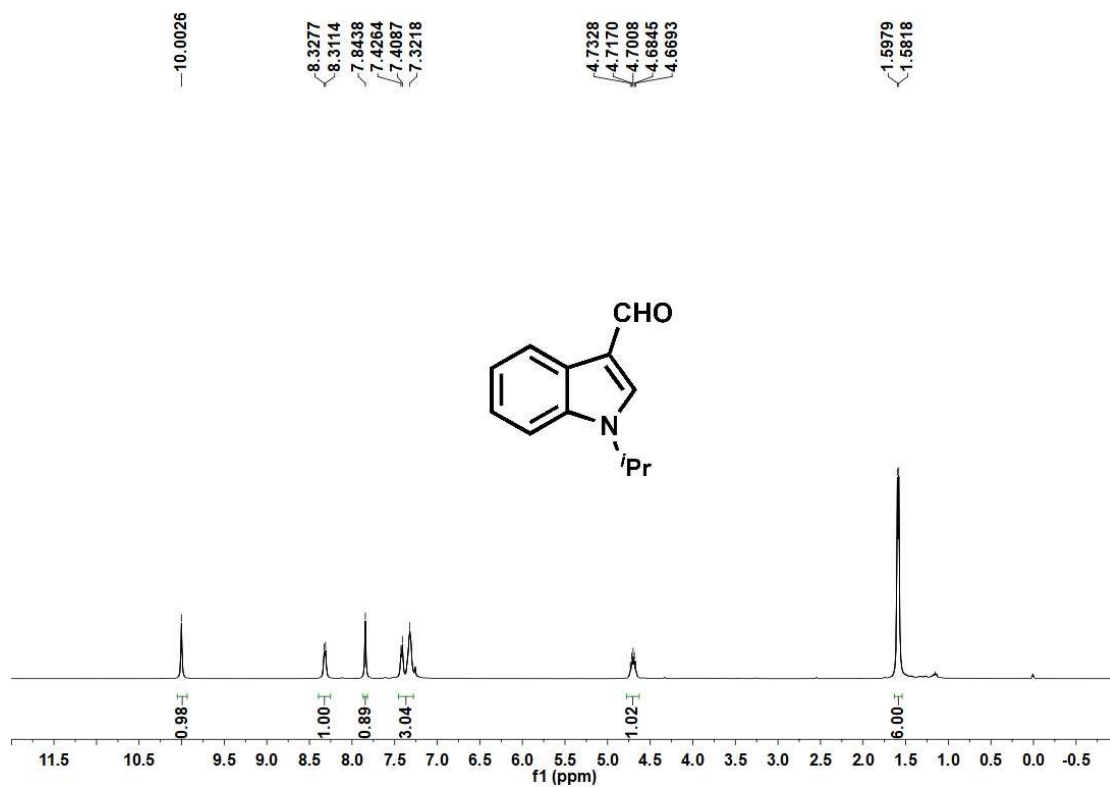

**$^{13}\text{C}$  NMR of product 2d in  $\text{CDCl}_3$  (100 MHz)**

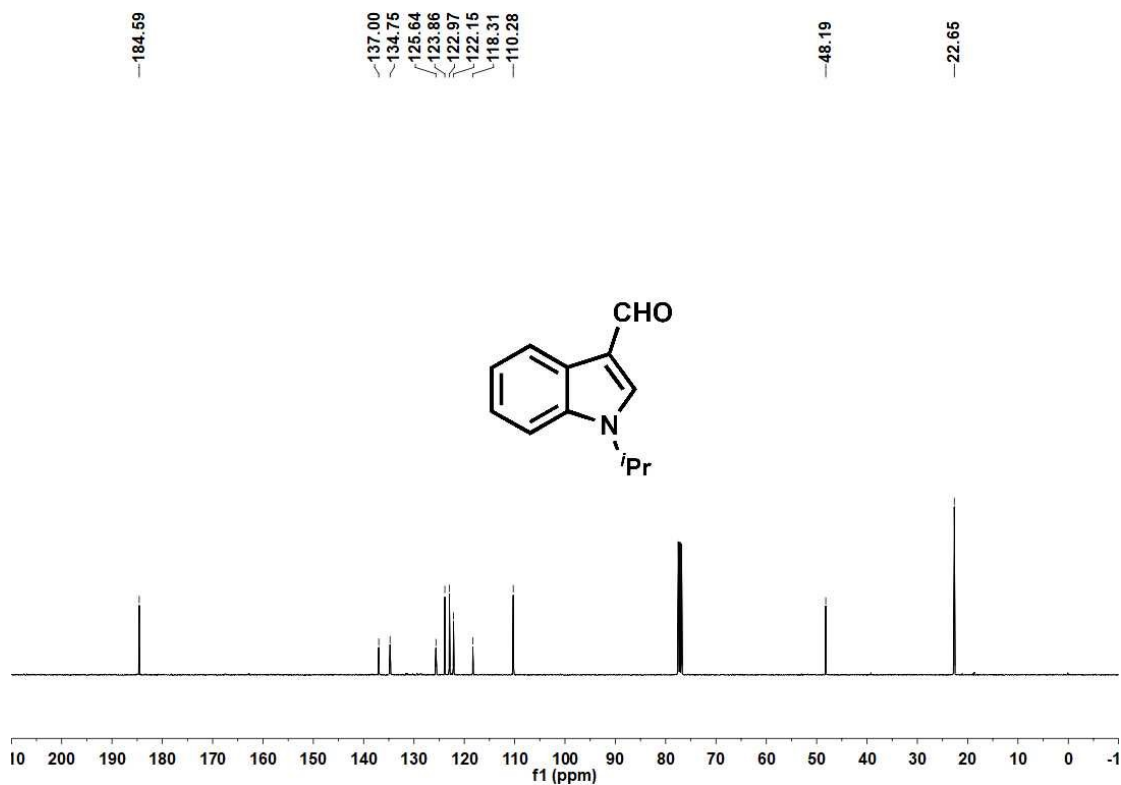

**$^1\text{H}$  NMR of product 2e in  $\text{CDCl}_3$  (400 MHz)**

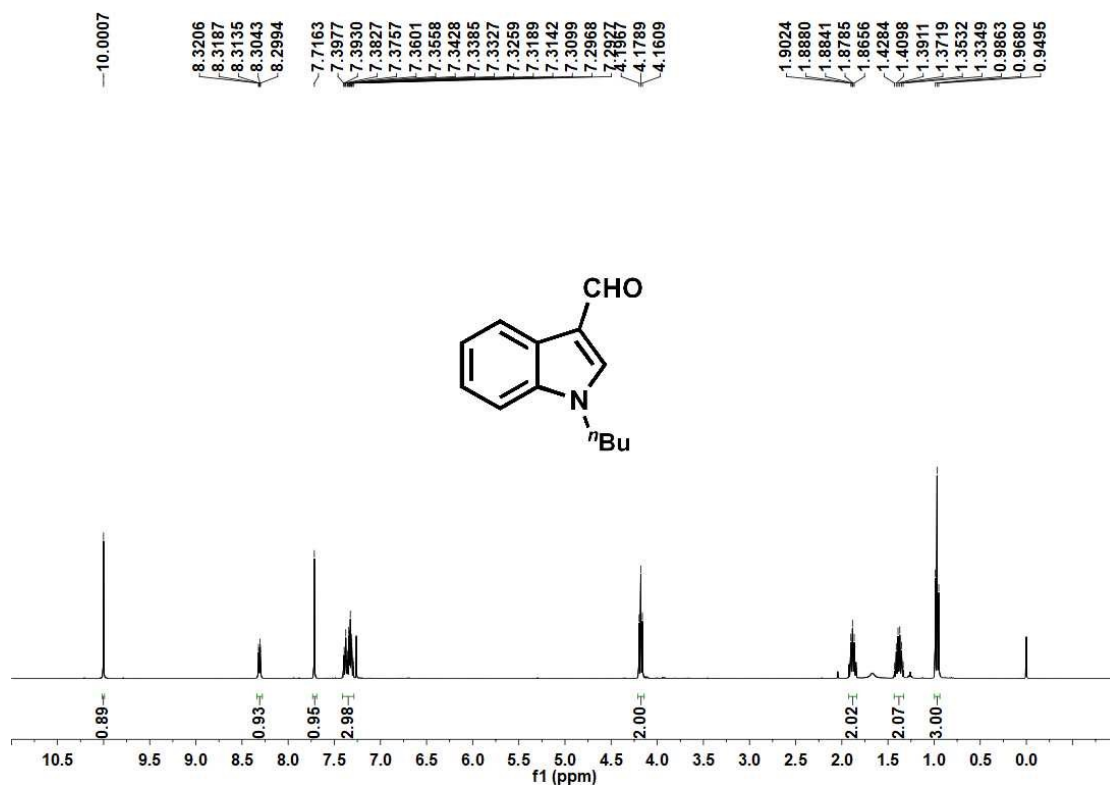

**$^{13}\text{C}$  NMR of product 2e in  $\text{CDCl}_3$  (100 MHz)**

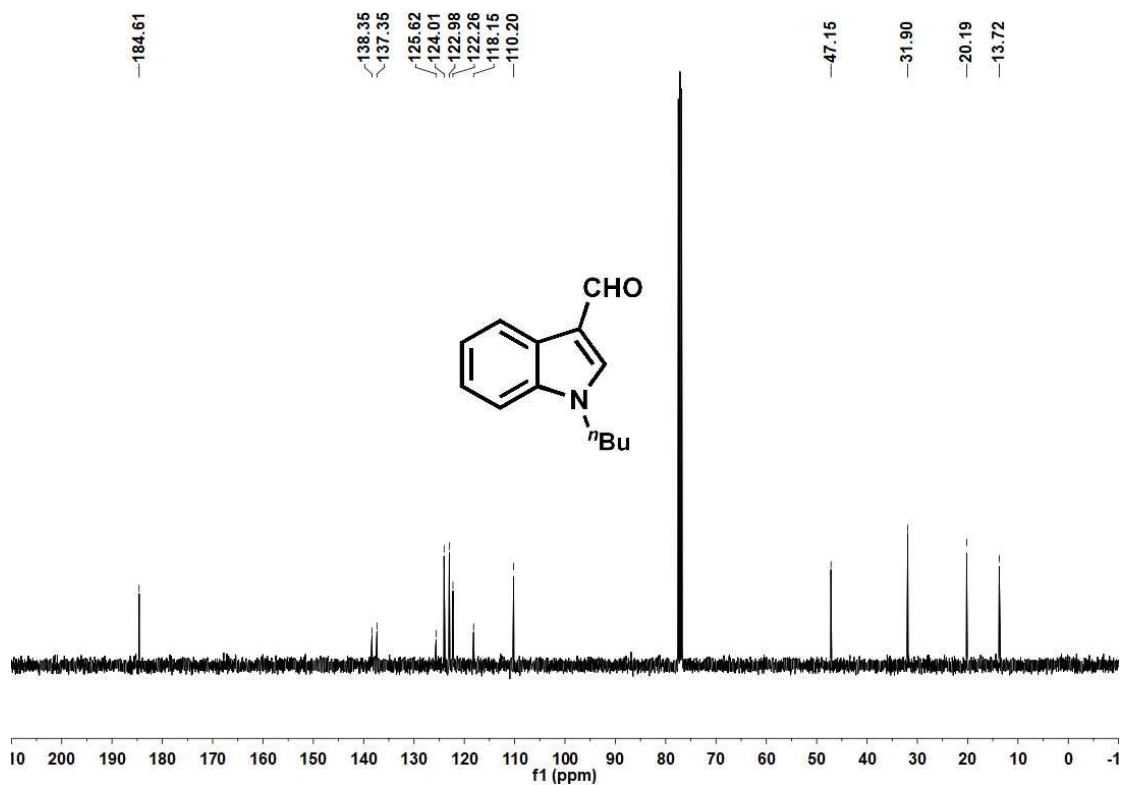

### $^1\text{H}$ NMR of product 2f in $\text{DMSO-}d_6$ (400 MHz)

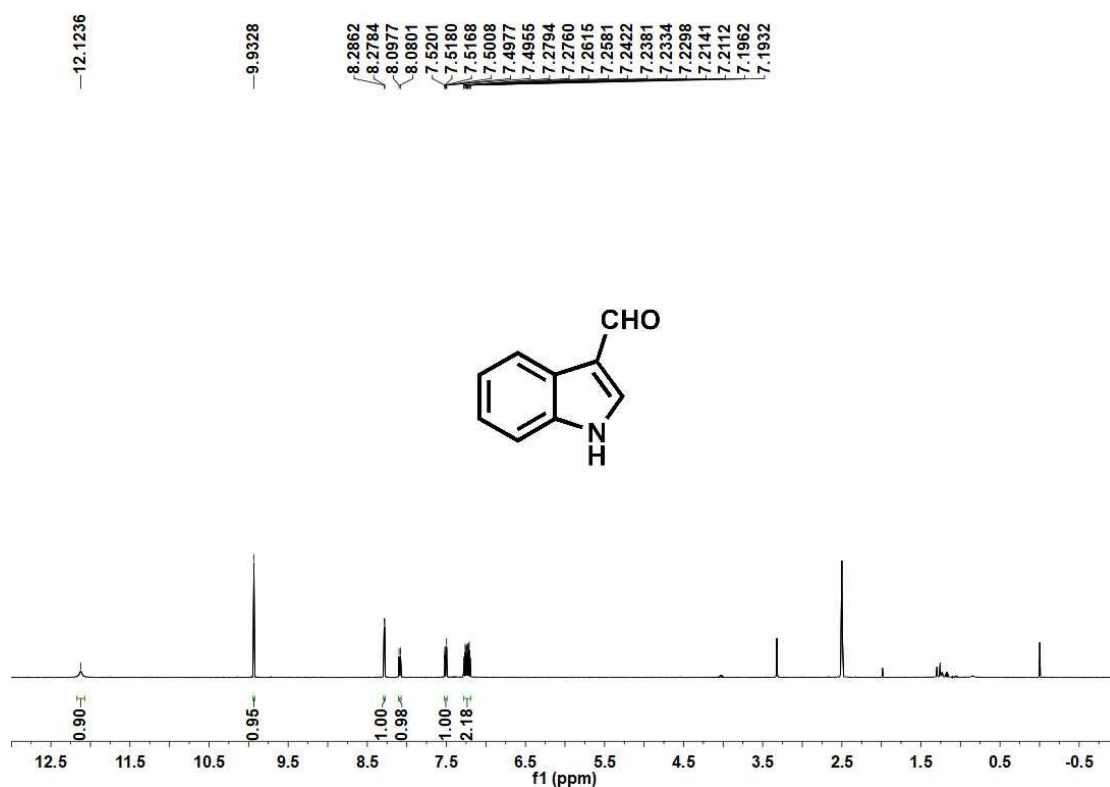

### $^{13}\text{C}$ NMR of product 2f in $\text{DMSO-}d_6$ (100 MHz)

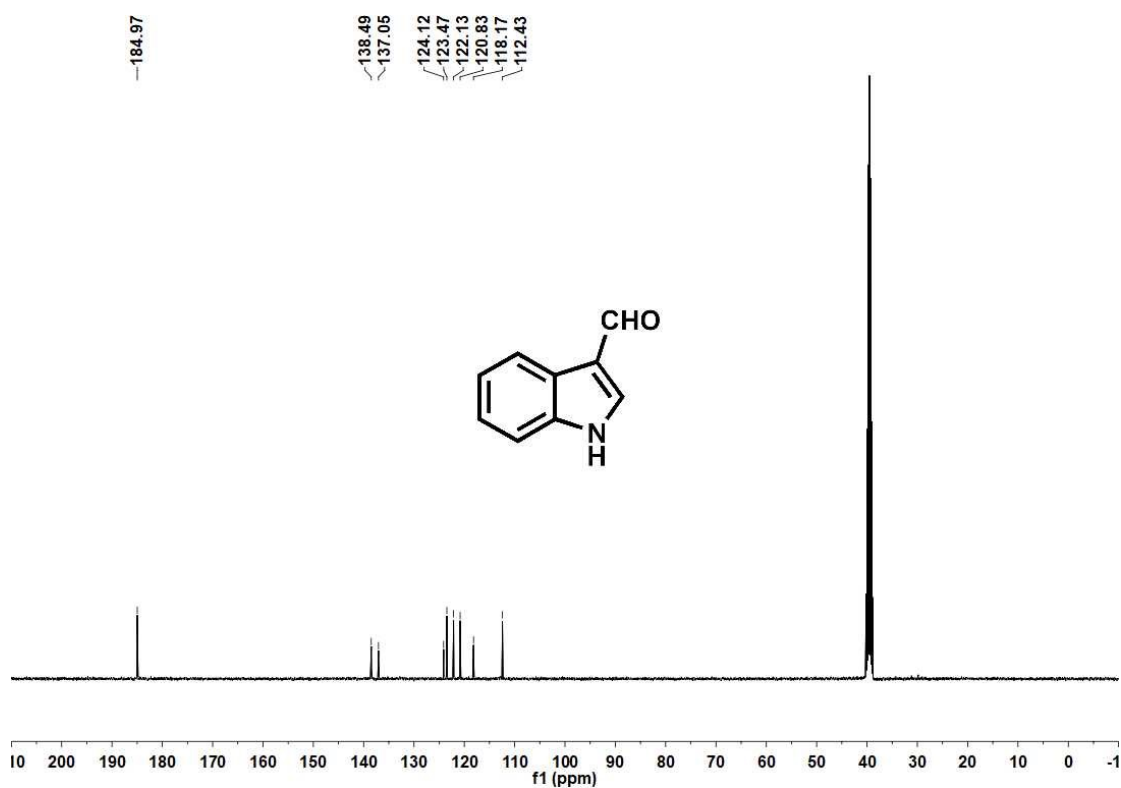



**$^1\text{H}$  NMR of product 2h in  $\text{CDCl}_3$  (400 MHz)**

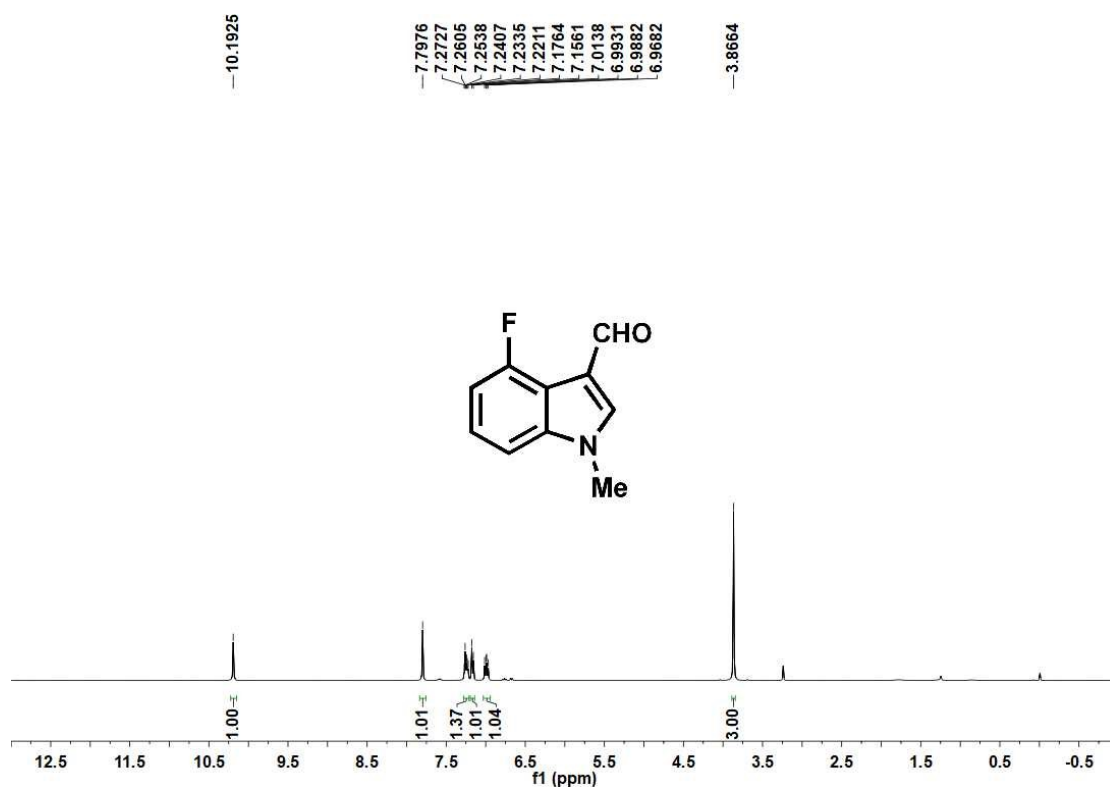

**$^{13}\text{C}$  NMR of product 2h in  $\text{CDCl}_3$  (100 MHz)**

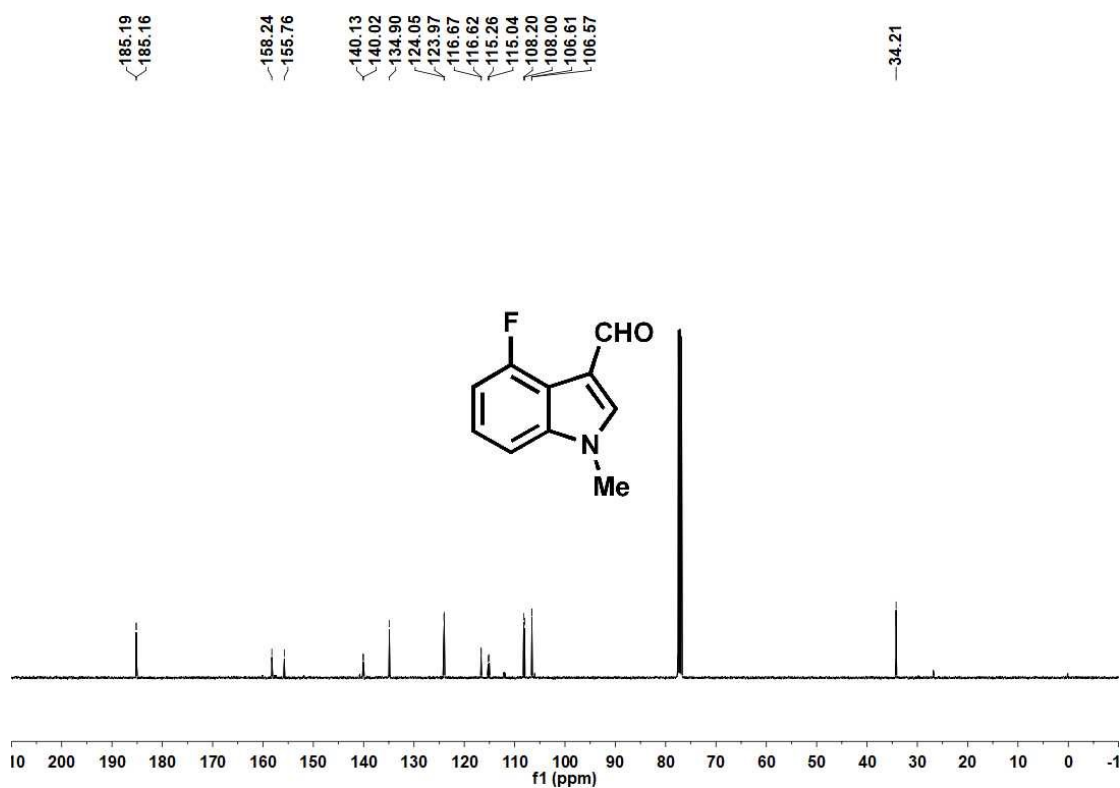

**<sup>1</sup>H NMR of product 2i in CDCl<sub>3</sub> (400 MHz)**

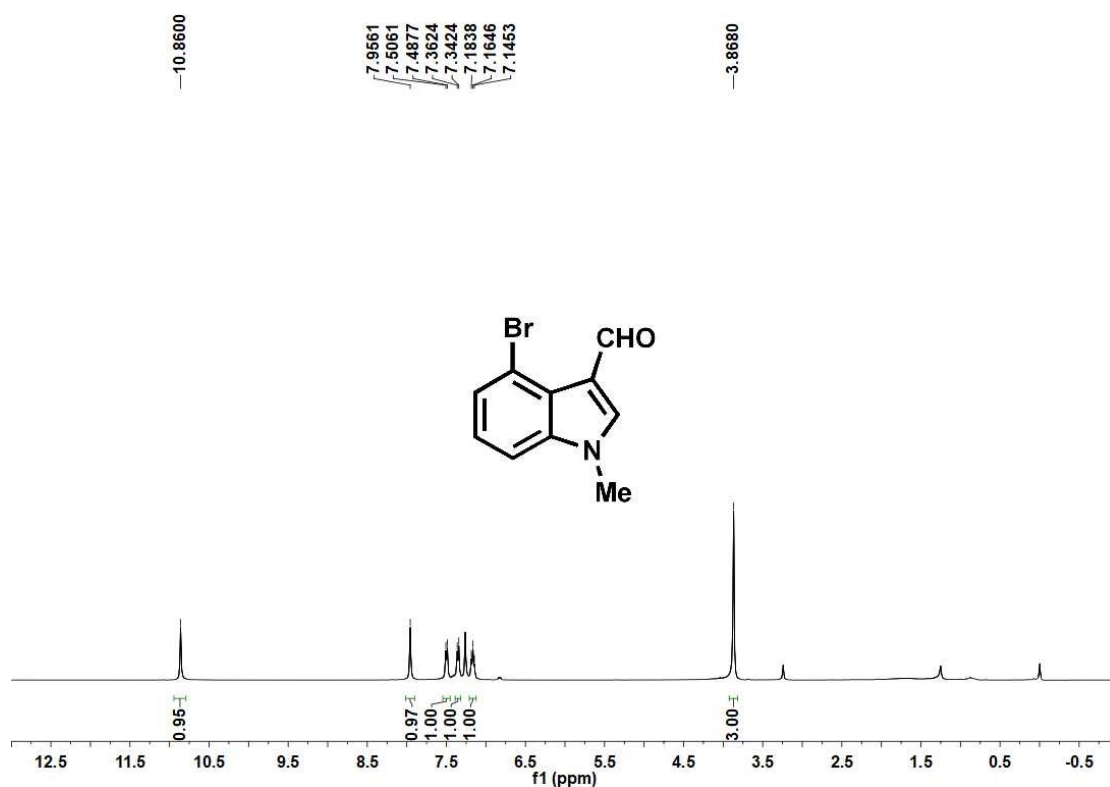

**<sup>13</sup>C NMR of product 2i in CDCl<sub>3</sub> (100 MHz)**

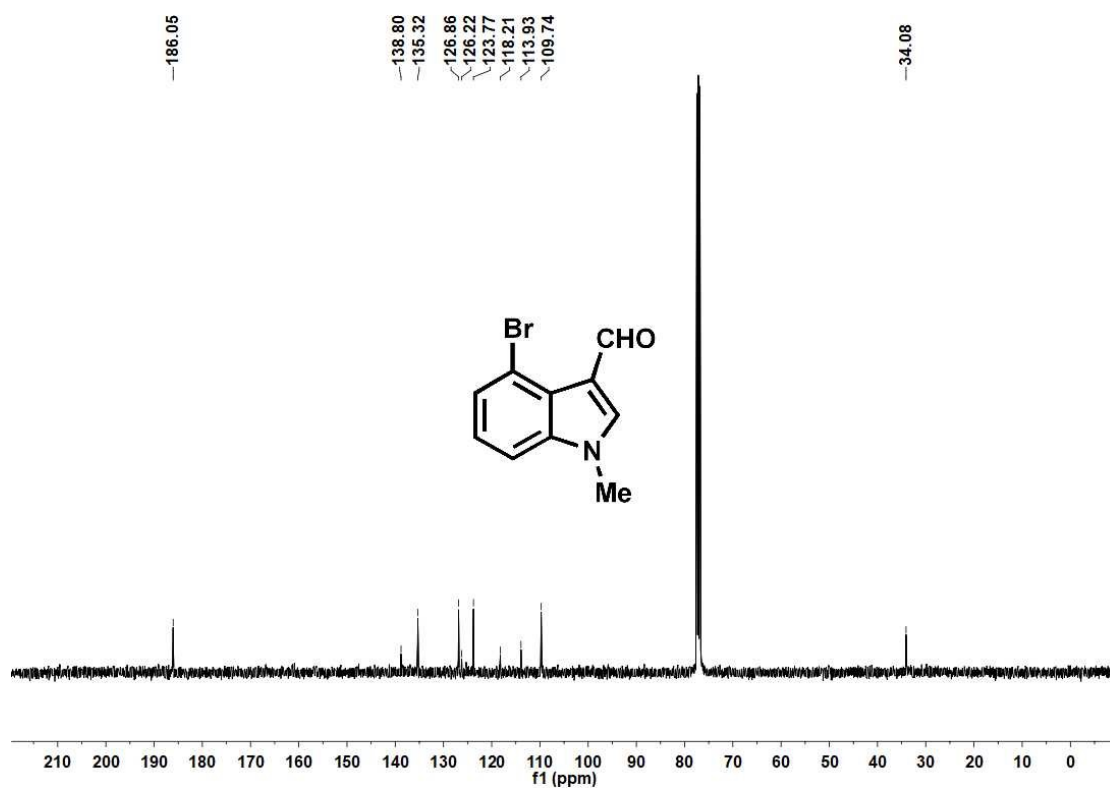

**<sup>1</sup>H NMR of product 2j in CDCl<sub>3</sub> (400 MHz)**

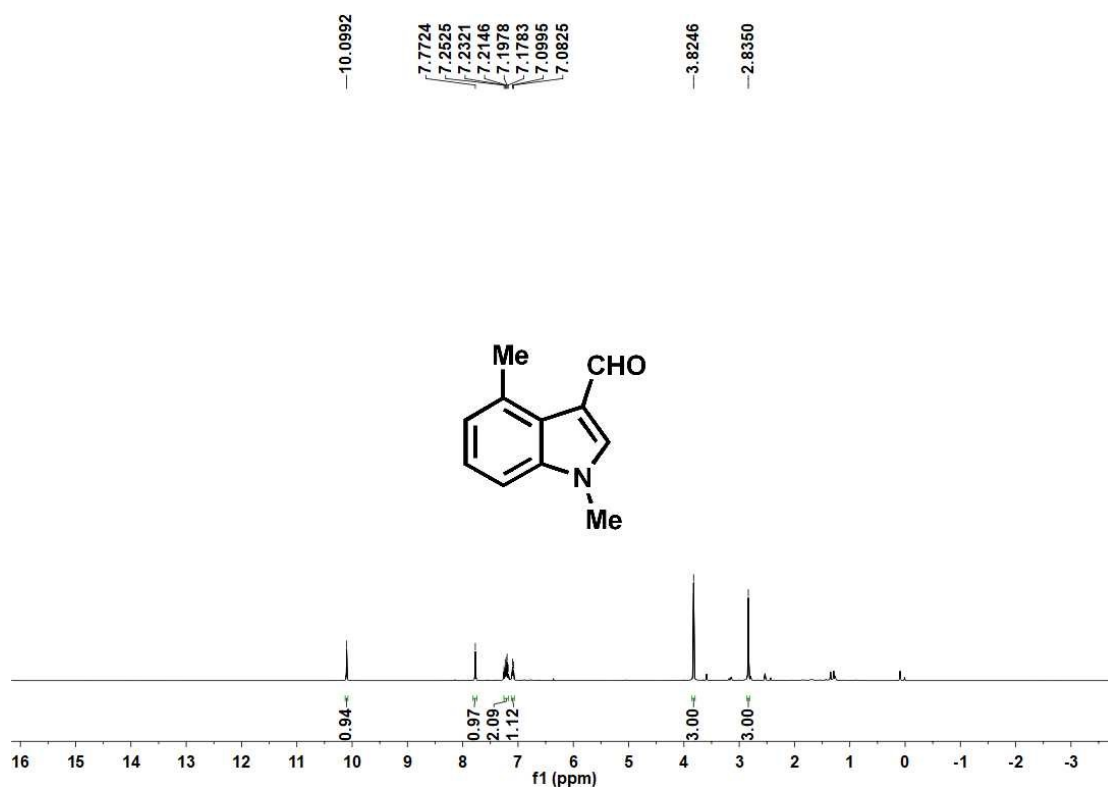

**<sup>13</sup>C NMR of product 2j in CDCl<sub>3</sub> (100 MHz)**

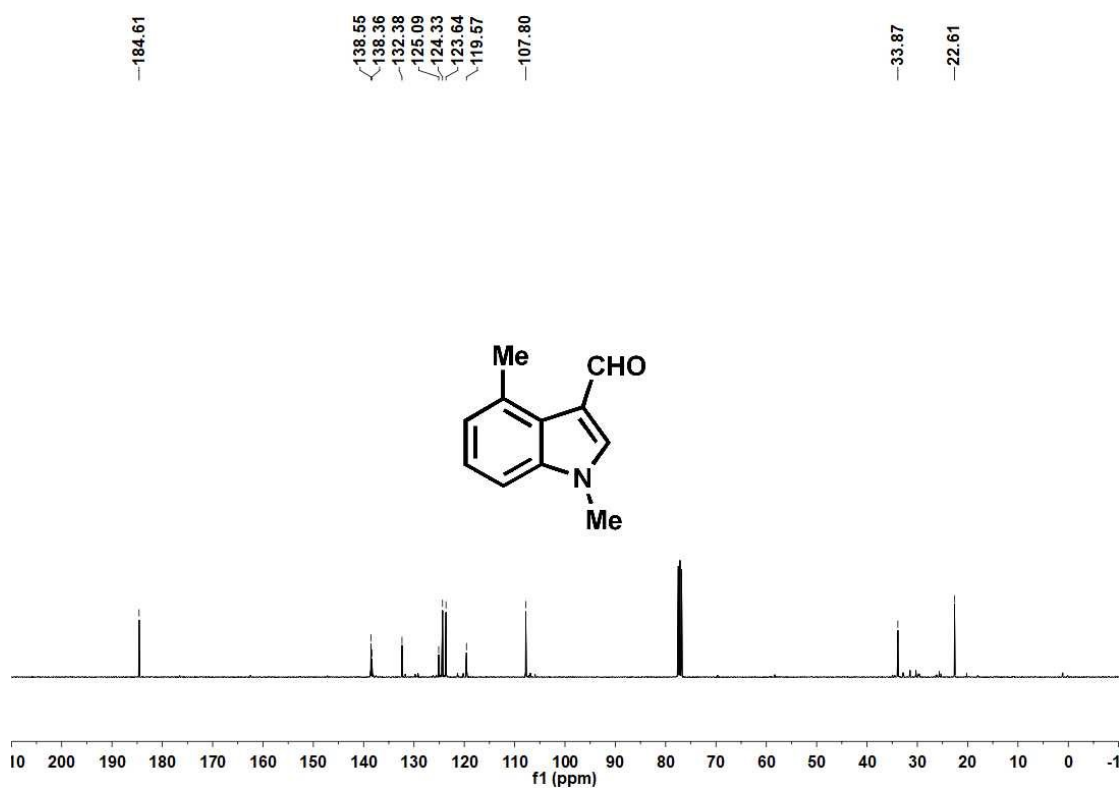

**<sup>1</sup>H NMR of product 2k in CDCl<sub>3</sub> (400 MHz)**

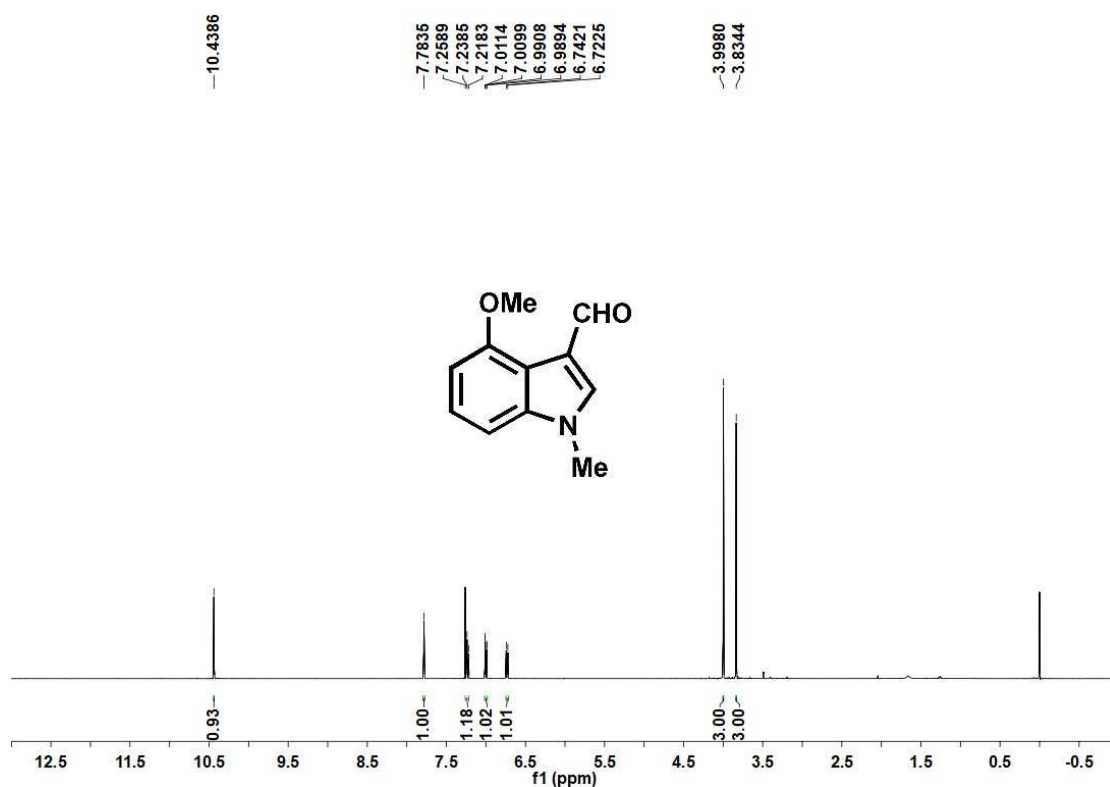

**<sup>13</sup>C NMR of product 2k in CDCl<sub>3</sub> (100 MHz)**

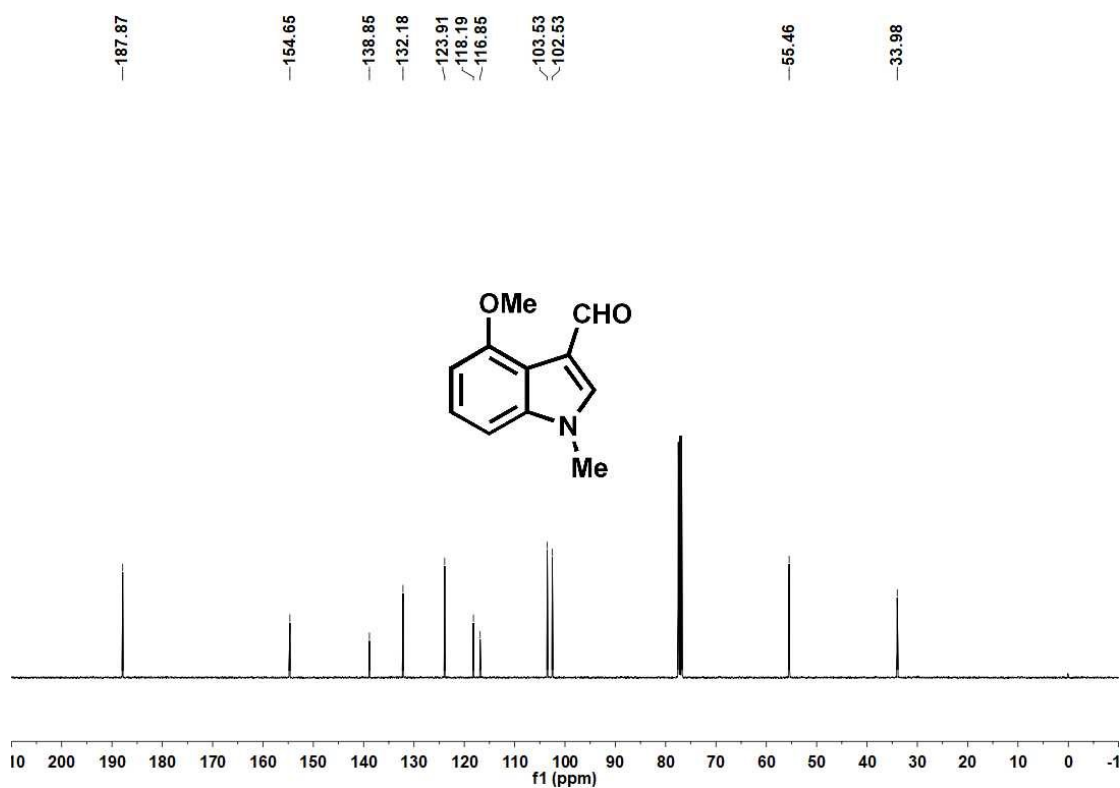

**<sup>1</sup>H NMR of product 2l in CDCl<sub>3</sub> (400 MHz)**

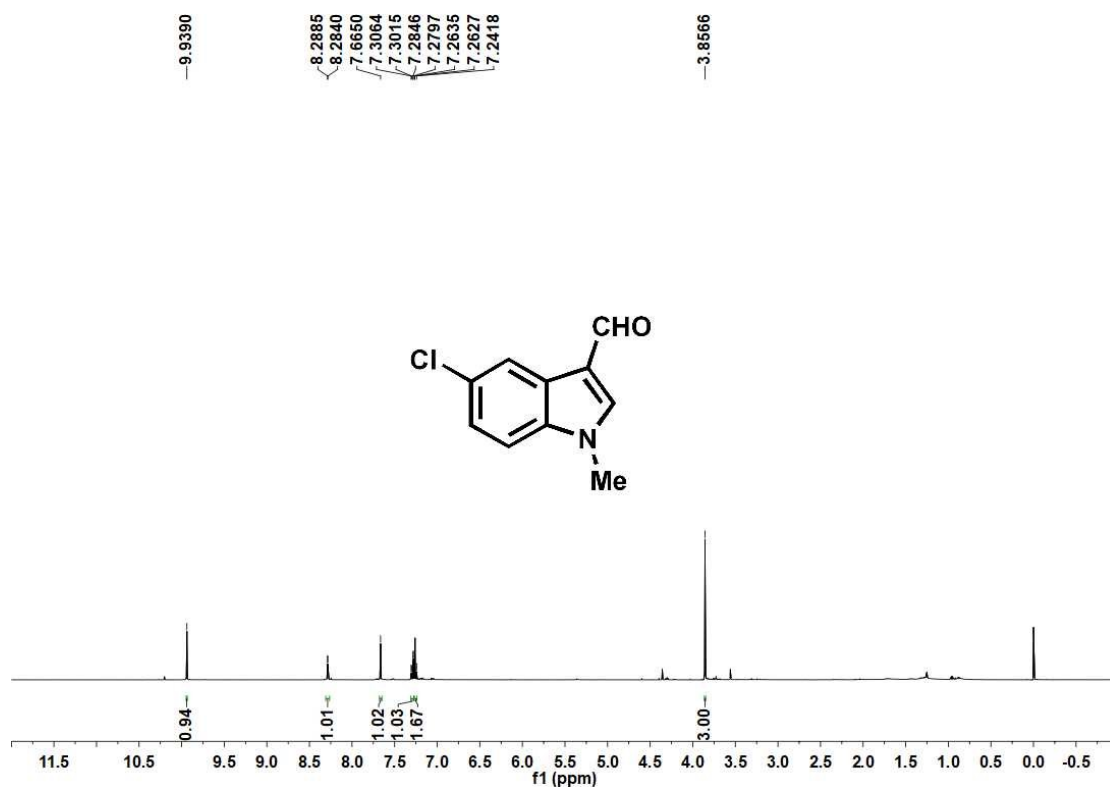

**<sup>13</sup>C NMR of product 2l in CDCl<sub>3</sub> (100 MHz)**

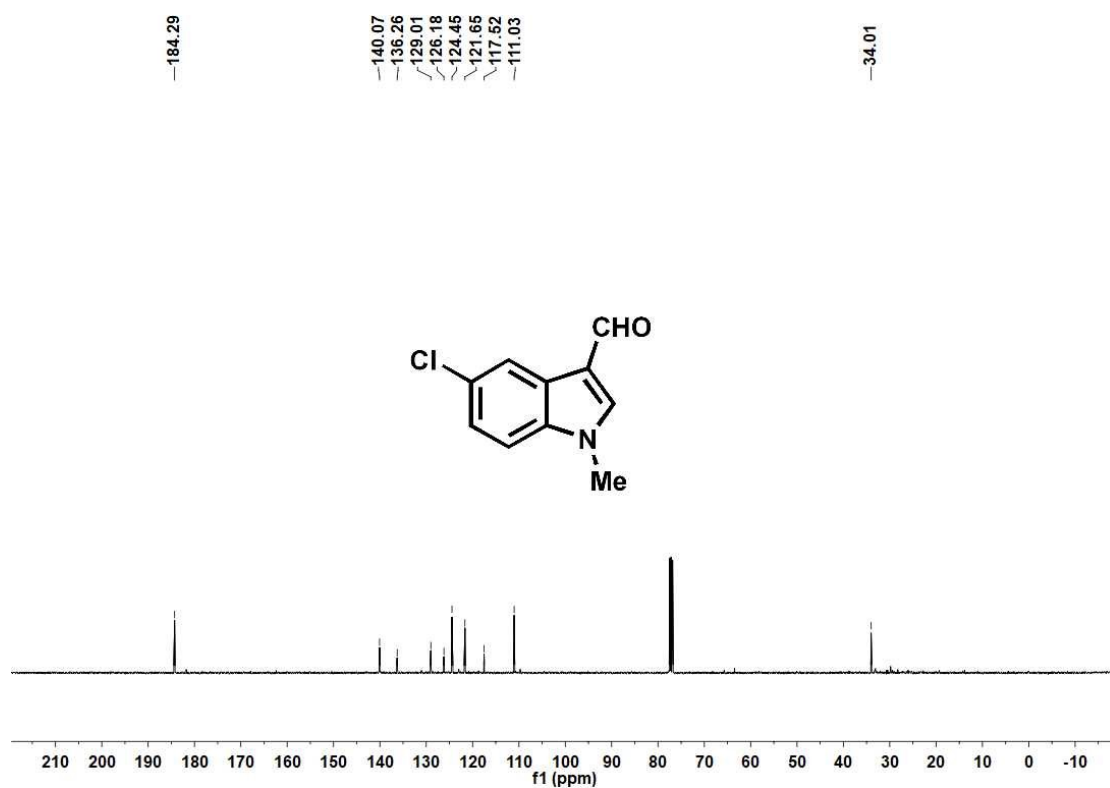

**<sup>1</sup>H NMR of product 2m in CDCl<sub>3</sub> (400 MHz)**

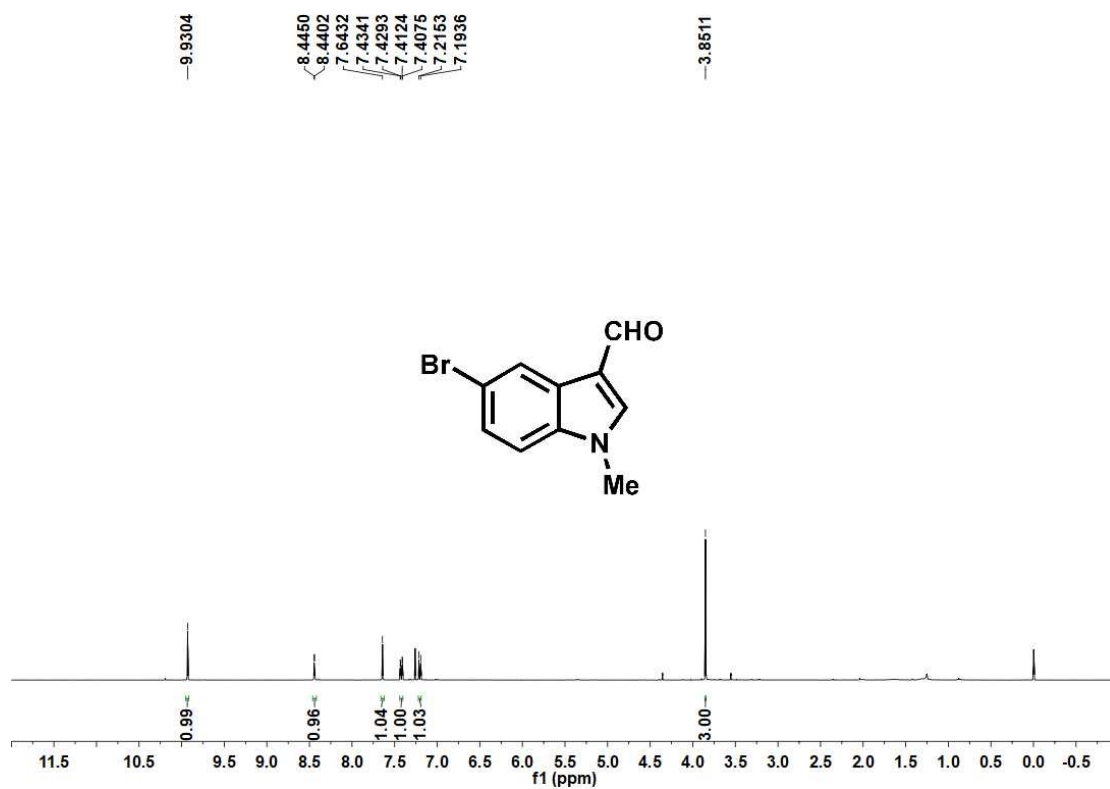

**<sup>13</sup>C NMR of product 2m in CDCl<sub>3</sub> (100 MHz)**

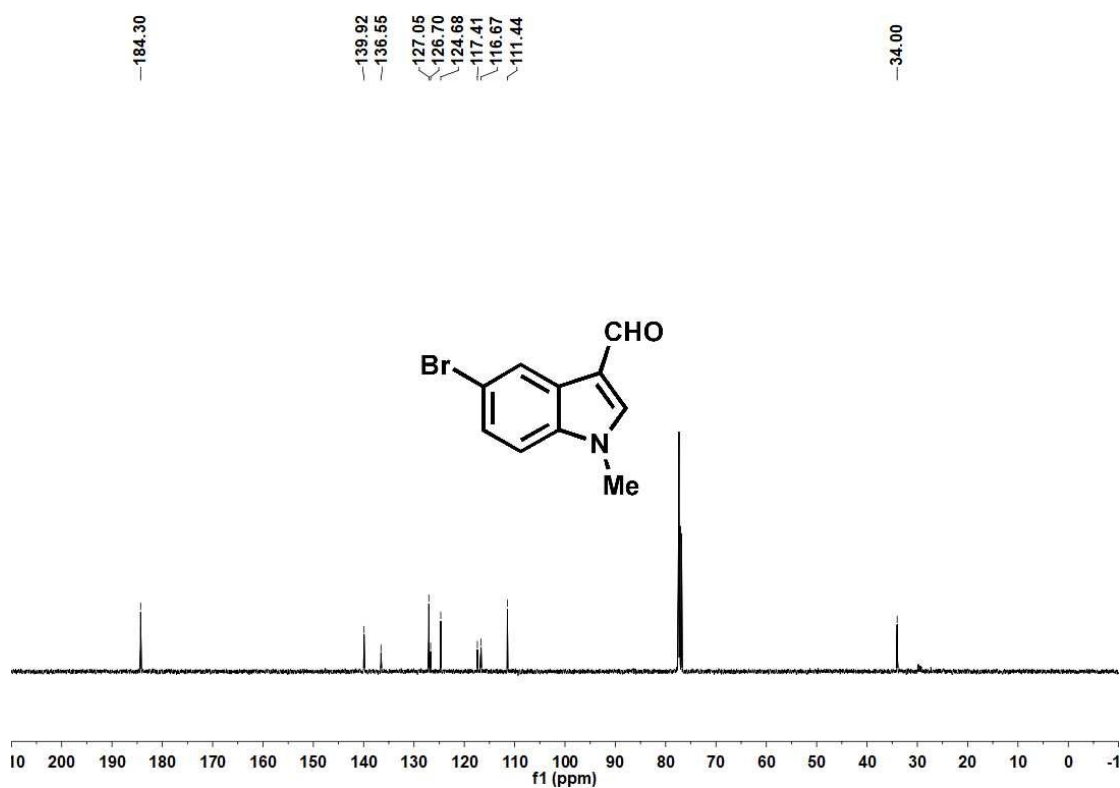

**<sup>1</sup>H NMR of product 2n in DMSO-*d*<sub>6</sub> (400 MHz)**

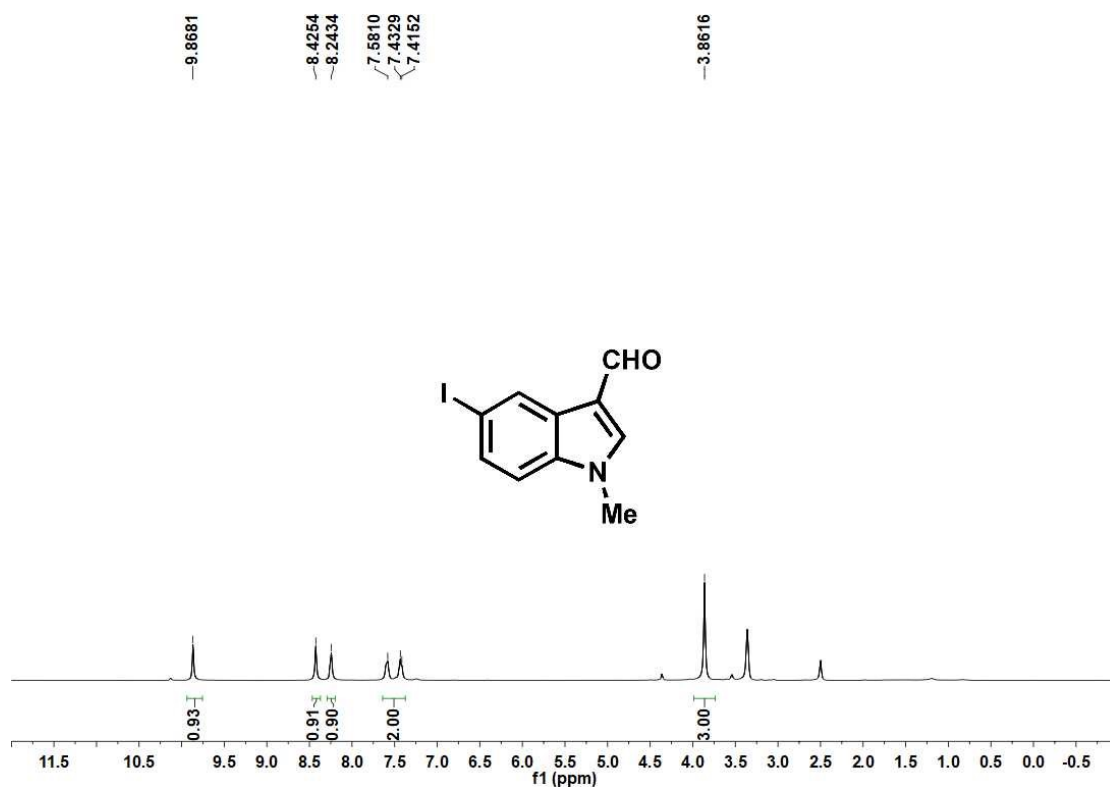

**<sup>13</sup>C NMR of product 2n in DMSO-*d*<sub>6</sub> (100 MHz)**

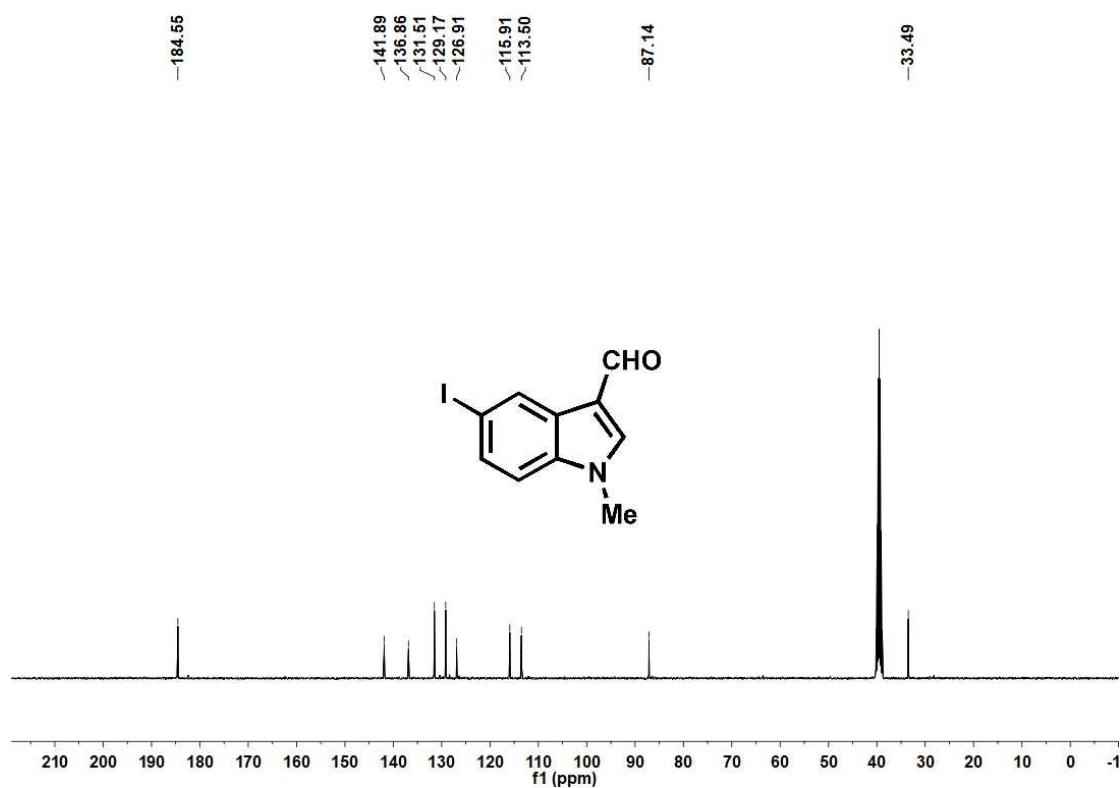

**<sup>1</sup>H NMR of product 2o in CDCl<sub>3</sub> (400 MHz)**

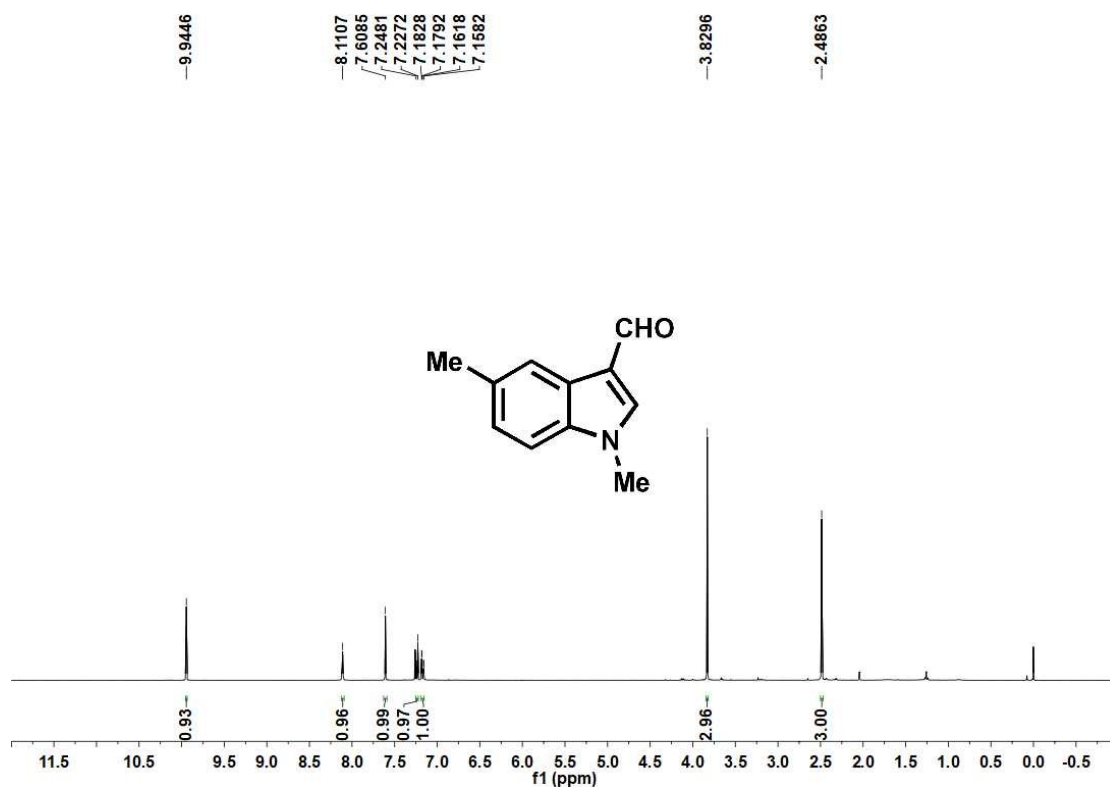

**<sup>13</sup>C NMR of product 2o in CDCl<sub>3</sub> (100 MHz)**

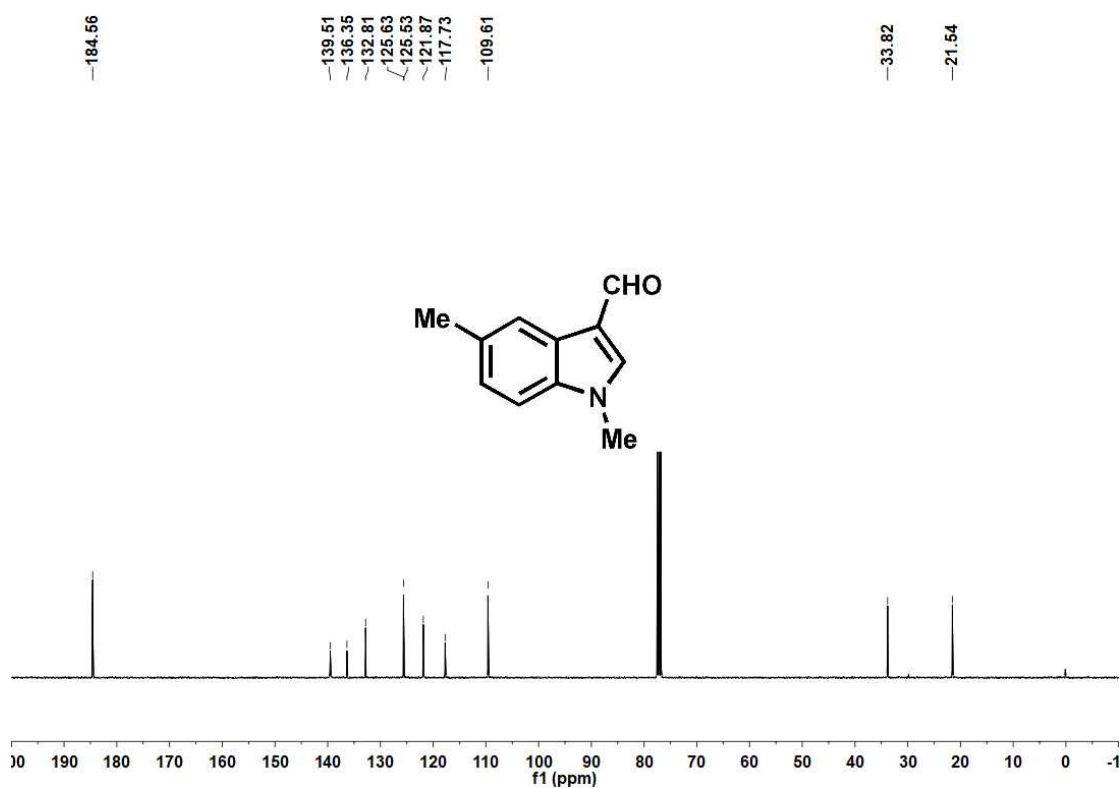



**<sup>1</sup>H NMR of product 2p in CDCl<sub>3</sub> (400 MHz)**

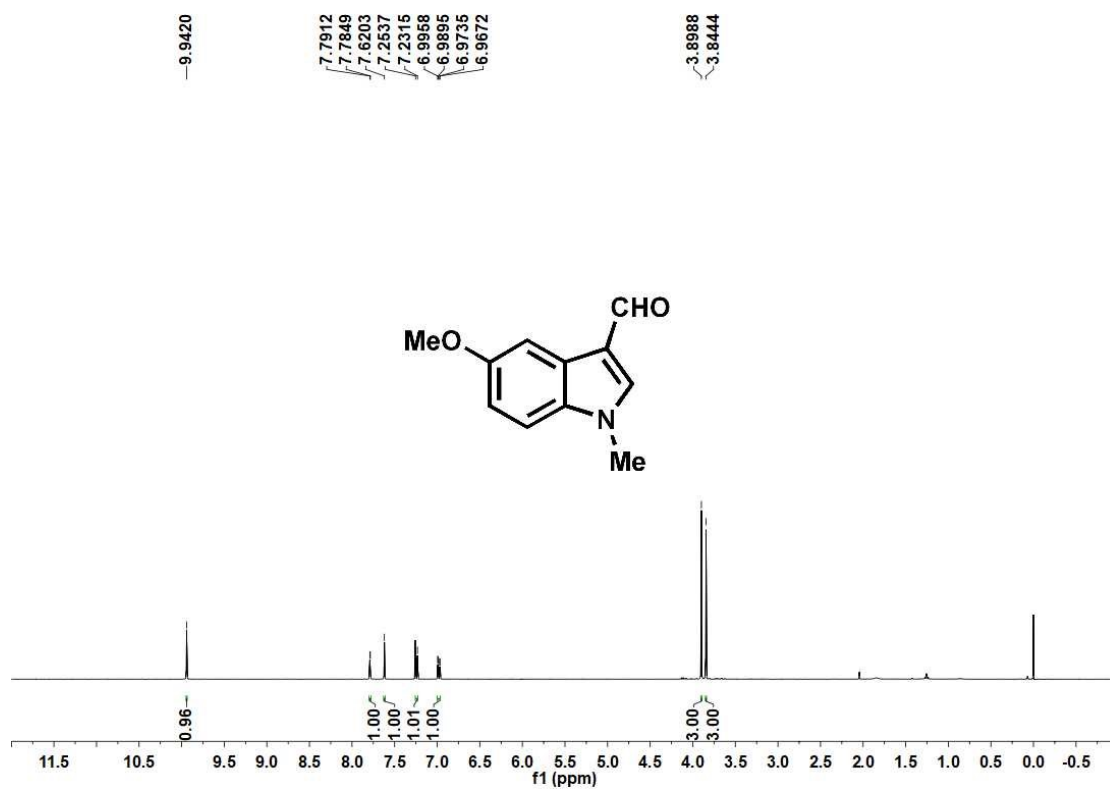

**<sup>13</sup>C NMR of product 2p in CDCl<sub>3</sub> (100 MHz)**

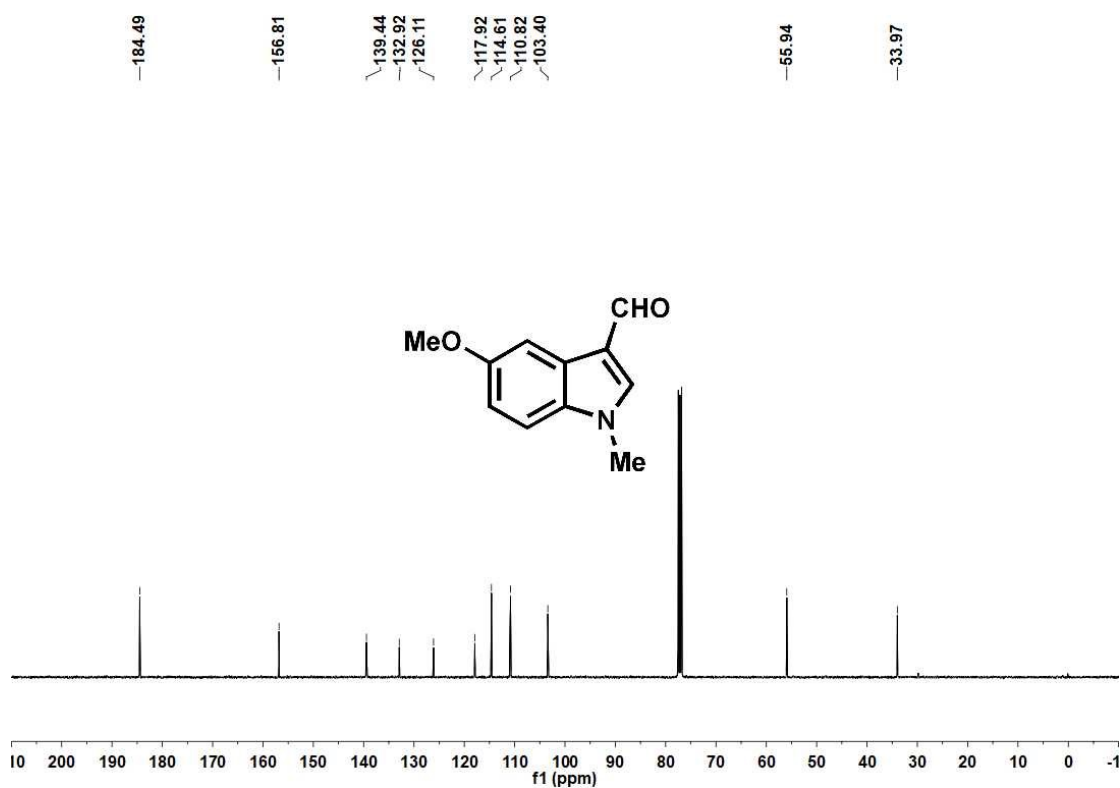

**<sup>1</sup>H NMR of product 2q in CDCl<sub>3</sub> (400 MHz)**

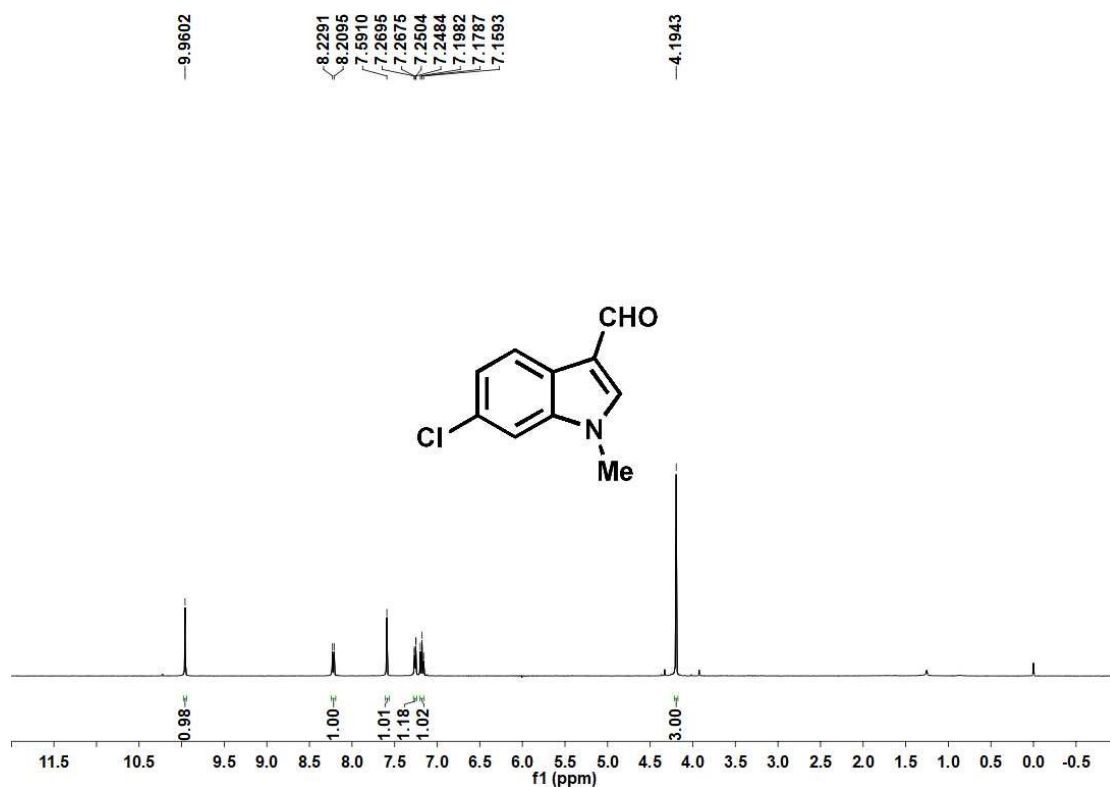

**<sup>13</sup>C NMR of product 2q in CDCl<sub>3</sub> (100 MHz)**

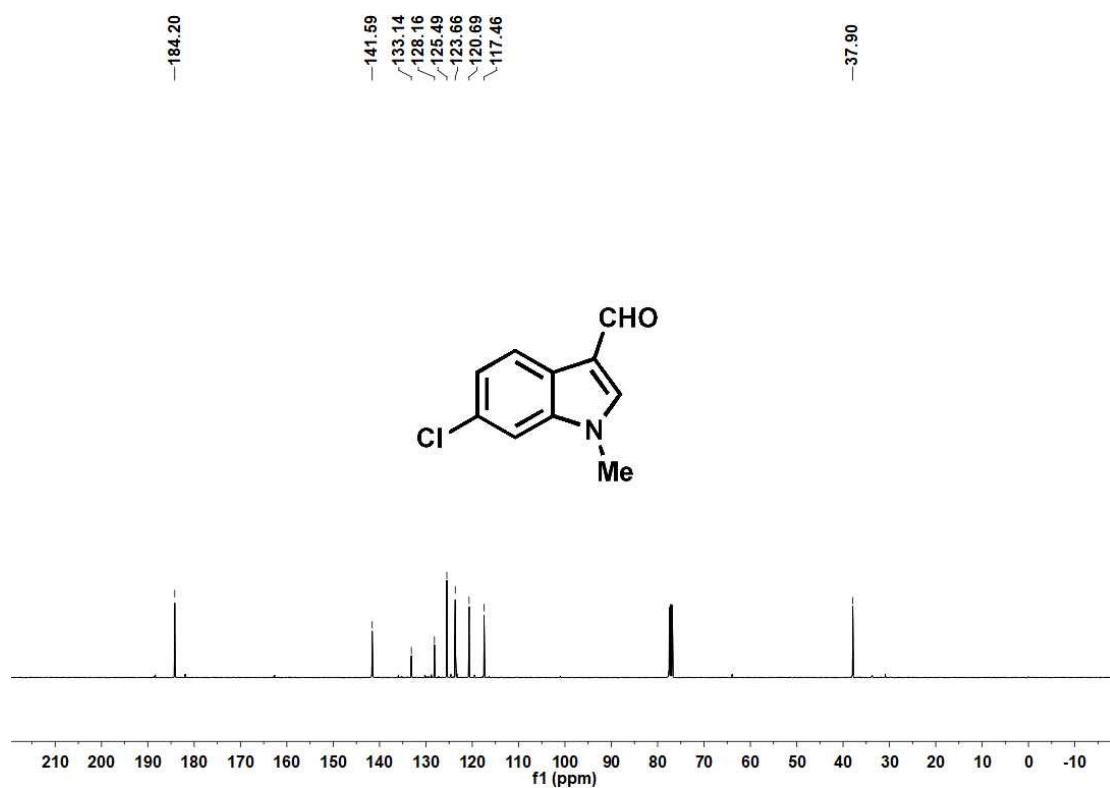

**<sup>1</sup>H NMR of product 2r in CDCl<sub>3</sub> (400 MHz)**

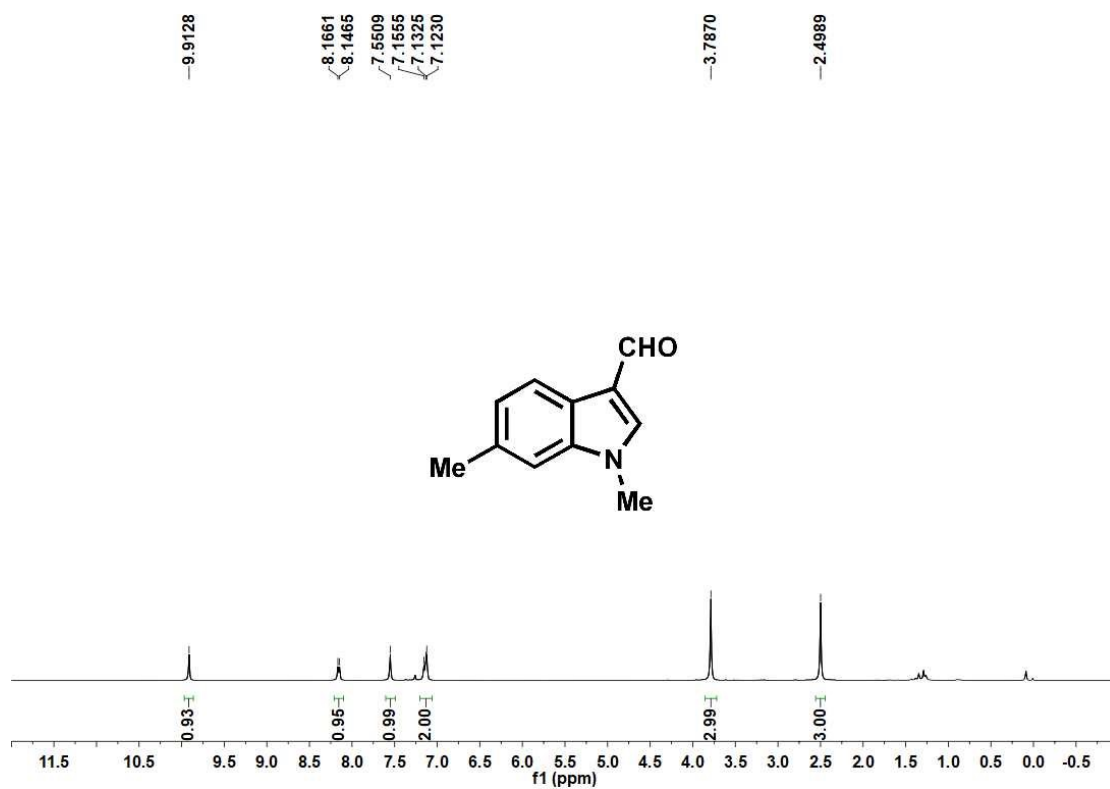

**<sup>13</sup>C NMR of product 2r in CDCl<sub>3</sub> (100 MHz)**

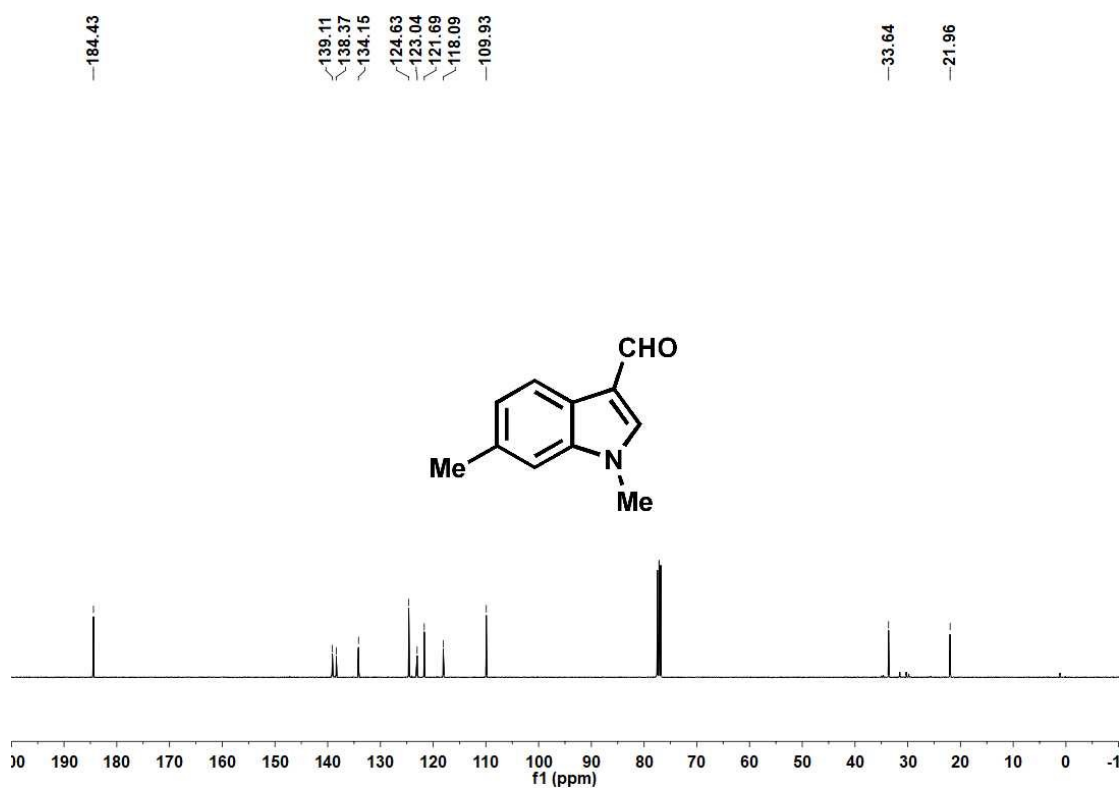

**<sup>1</sup>H NMR of product 2s in CDCl<sub>3</sub> (400 MHz)**

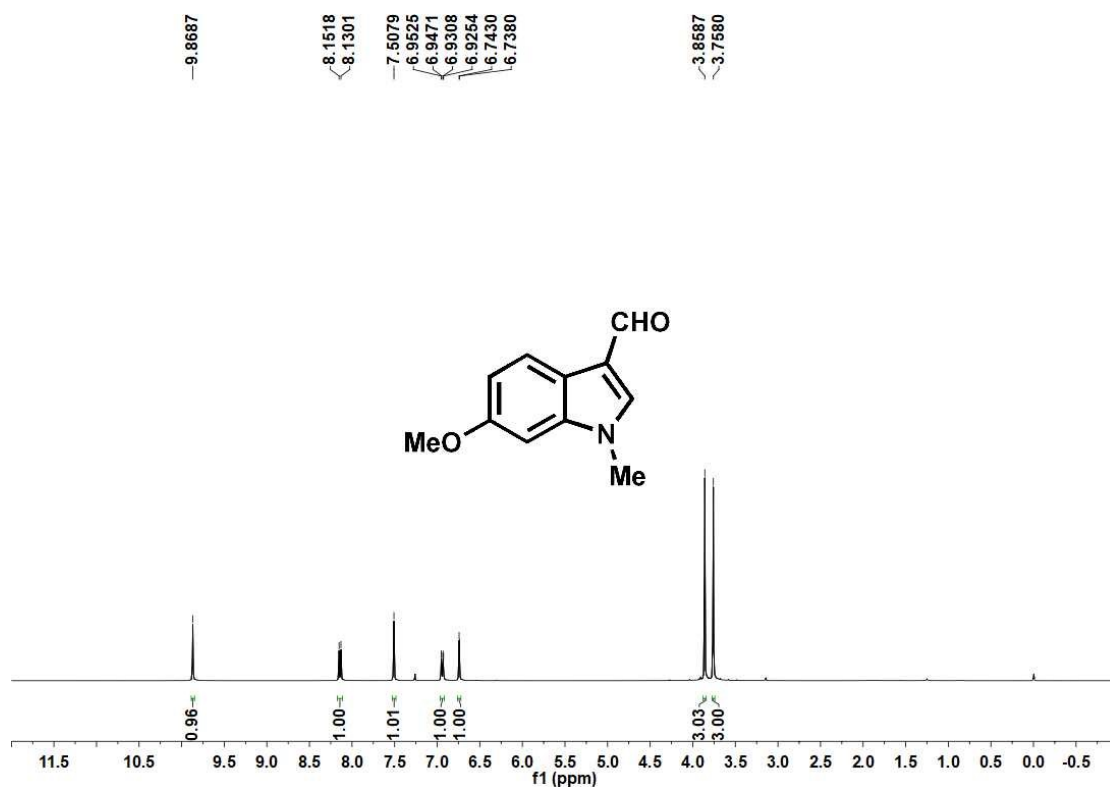

**<sup>13</sup>C NMR of product 2s in CDCl<sub>3</sub> (100 MHz)**

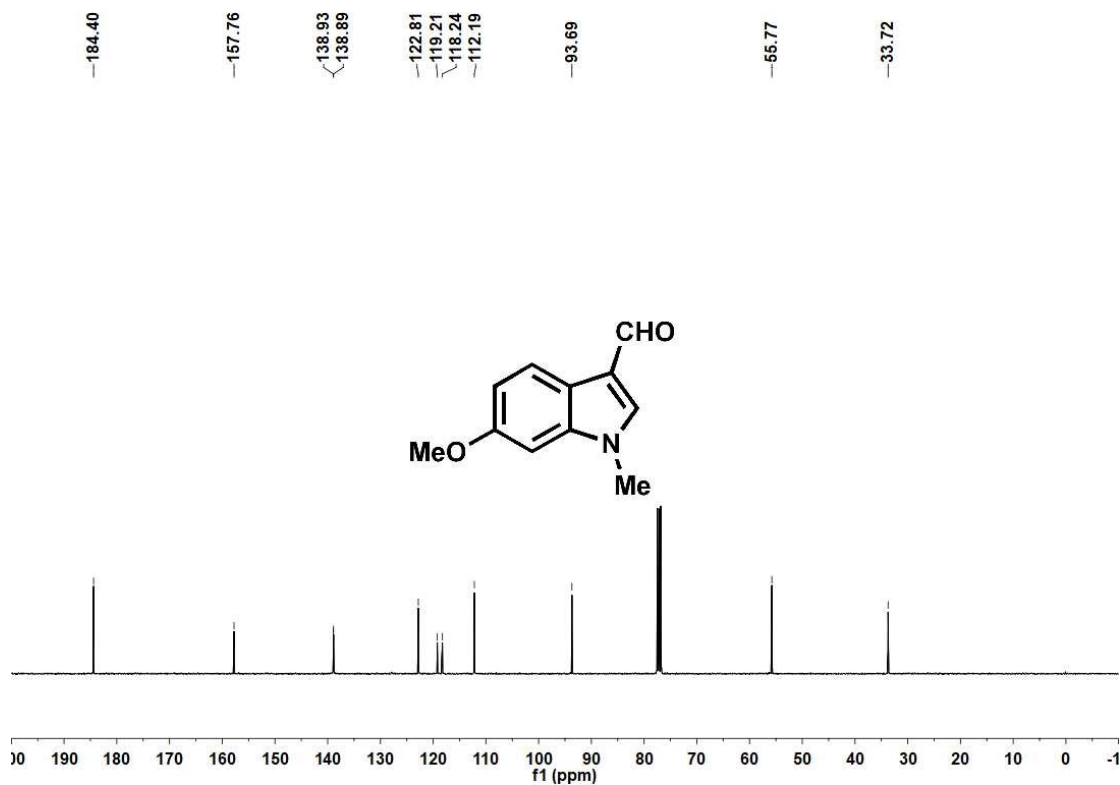

**<sup>1</sup>H NMR of product 2t in DMSO-*d*<sub>6</sub> (400 MHz)**

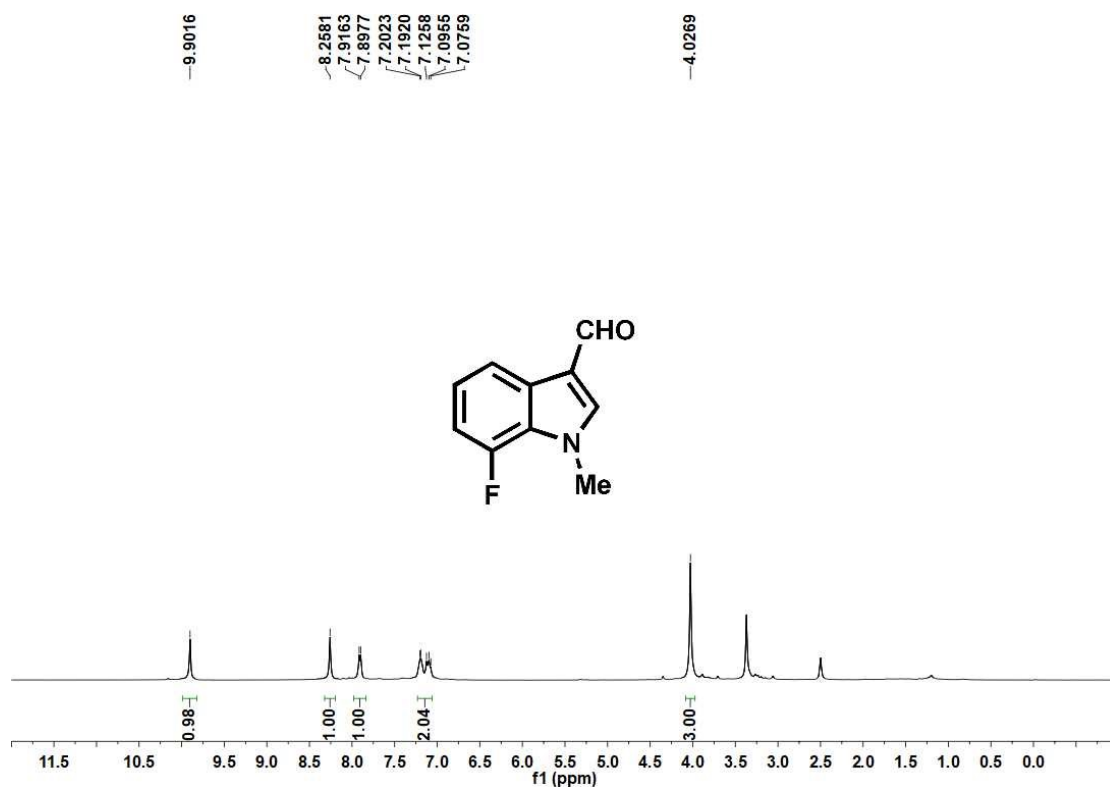

**<sup>13</sup>C NMR of product 2t in DMSO-*d*<sub>6</sub> (100 MHz)**

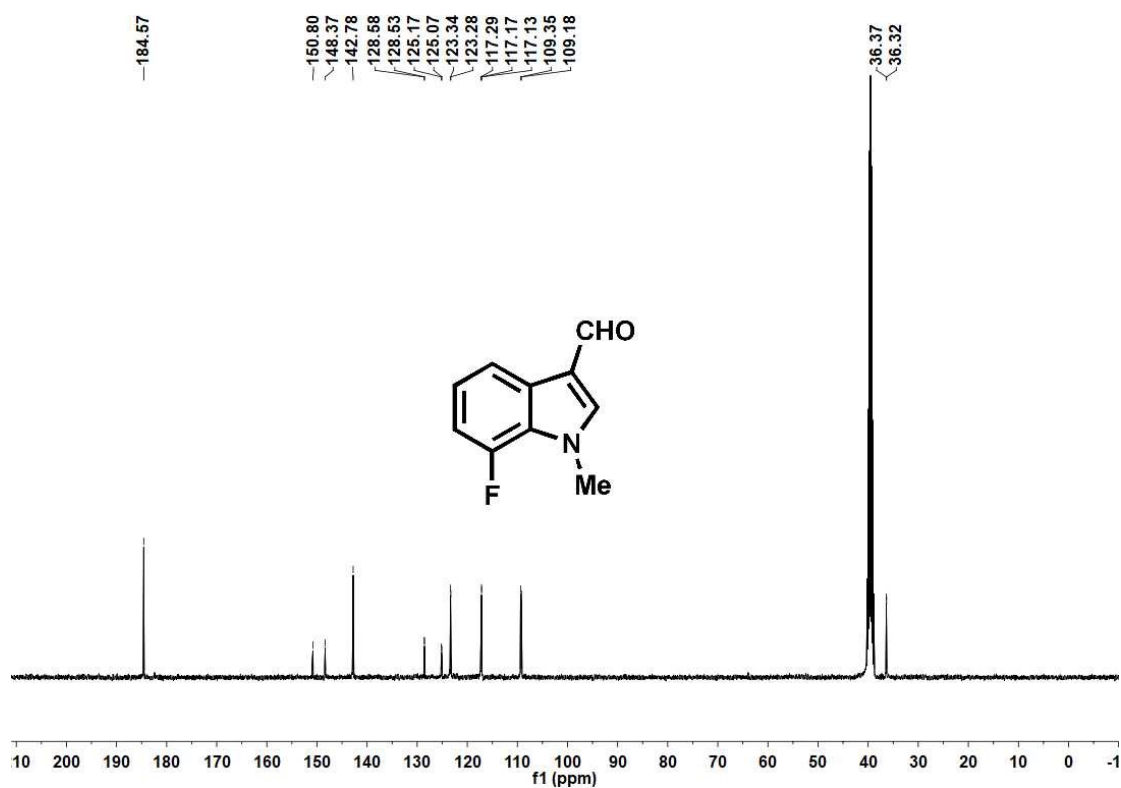

**<sup>1</sup>H NMR of product 2u in CDCl<sub>3</sub> (400 MHz)**

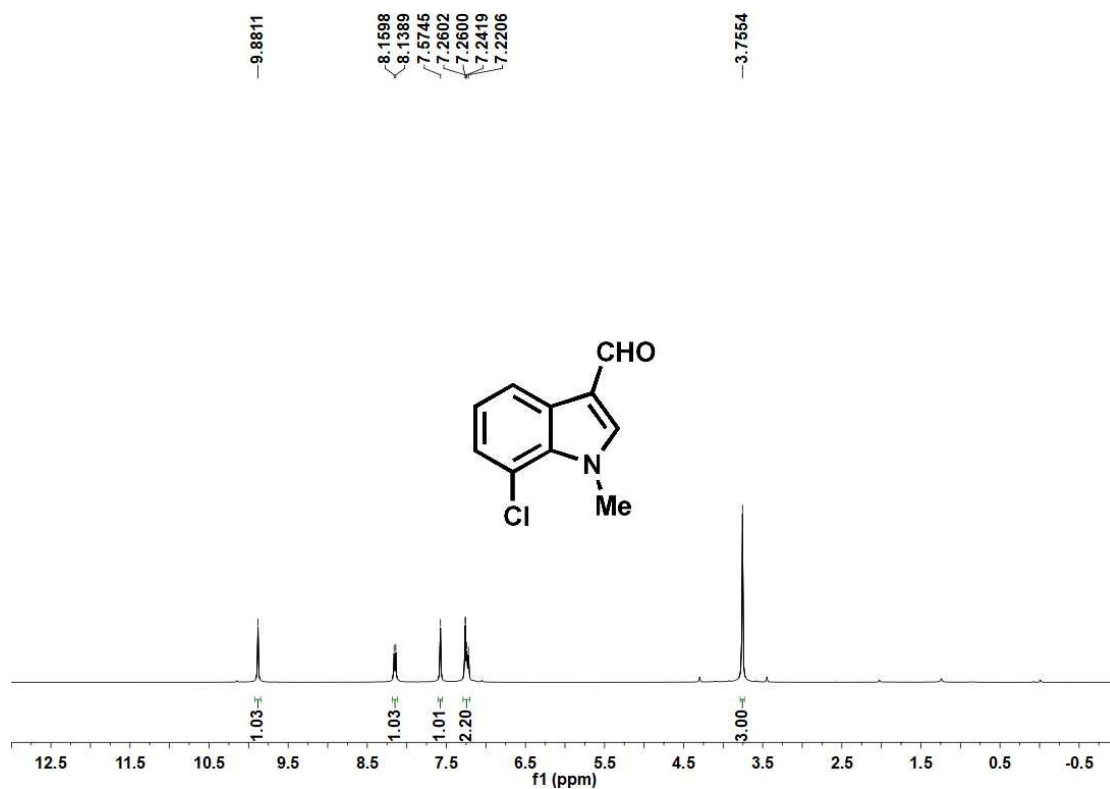

**<sup>13</sup>C NMR of product 2u in CDCl<sub>3</sub> (100 MHz)**

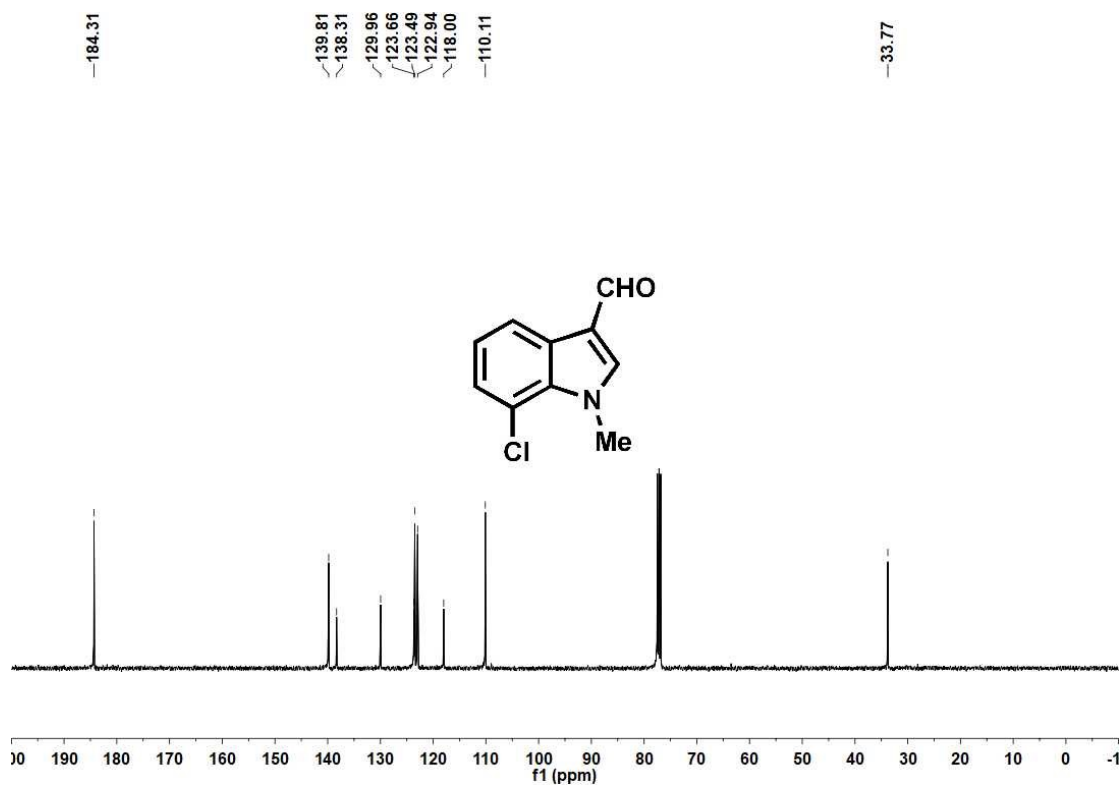

**<sup>1</sup>H NMR of product 2v in CDCl<sub>3</sub> (400 MHz)**

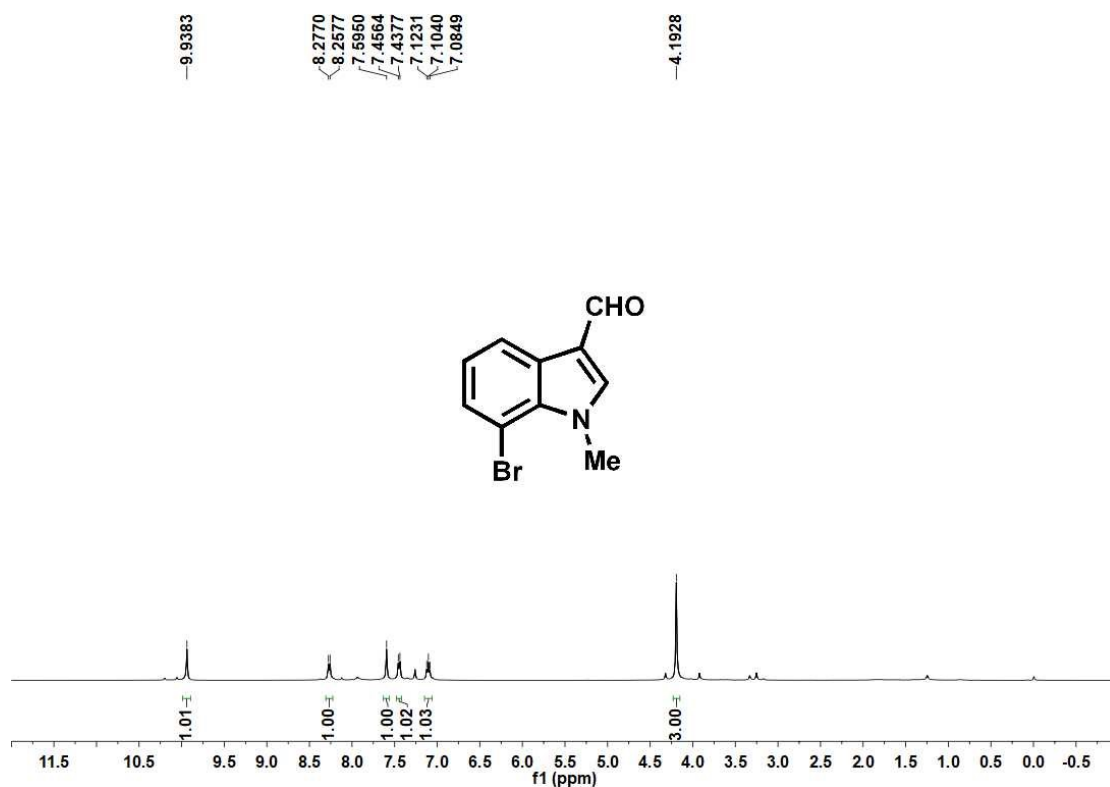

**<sup>13</sup>C NMR of product 2v in CDCl<sub>3</sub> (100 MHz)**

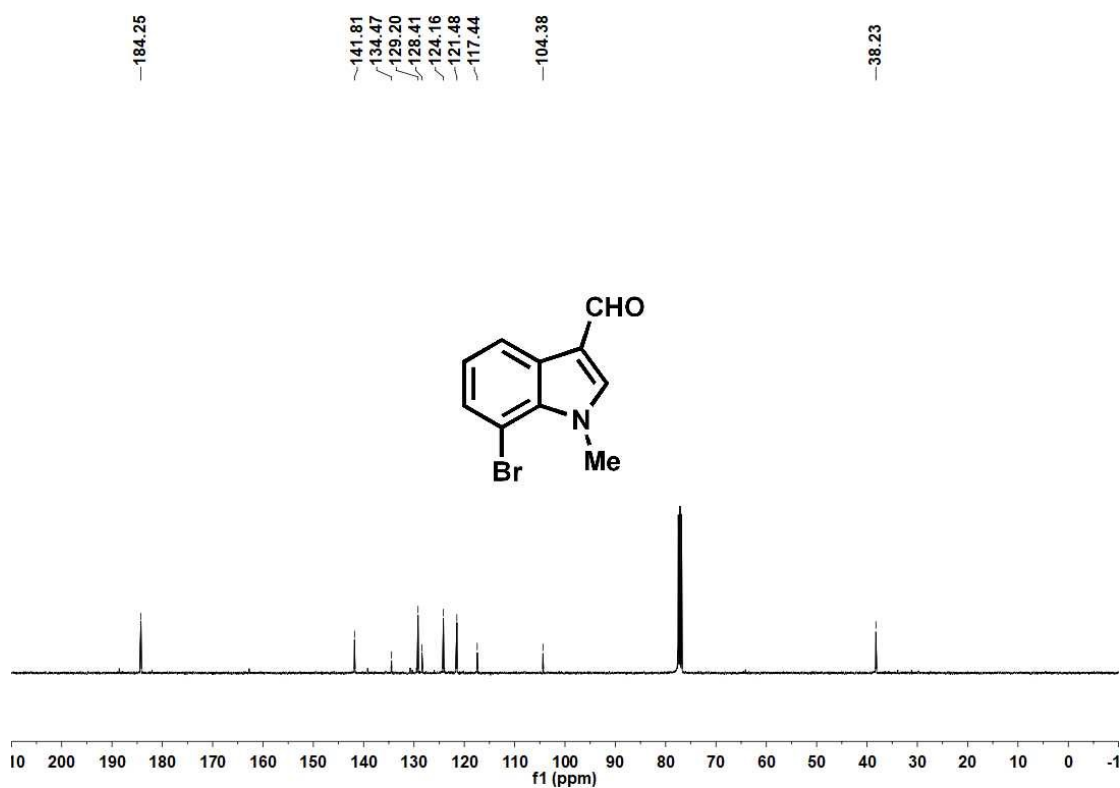

**<sup>1</sup>H NMR of product 2w in CDCl<sub>3</sub> (400 MHz)**

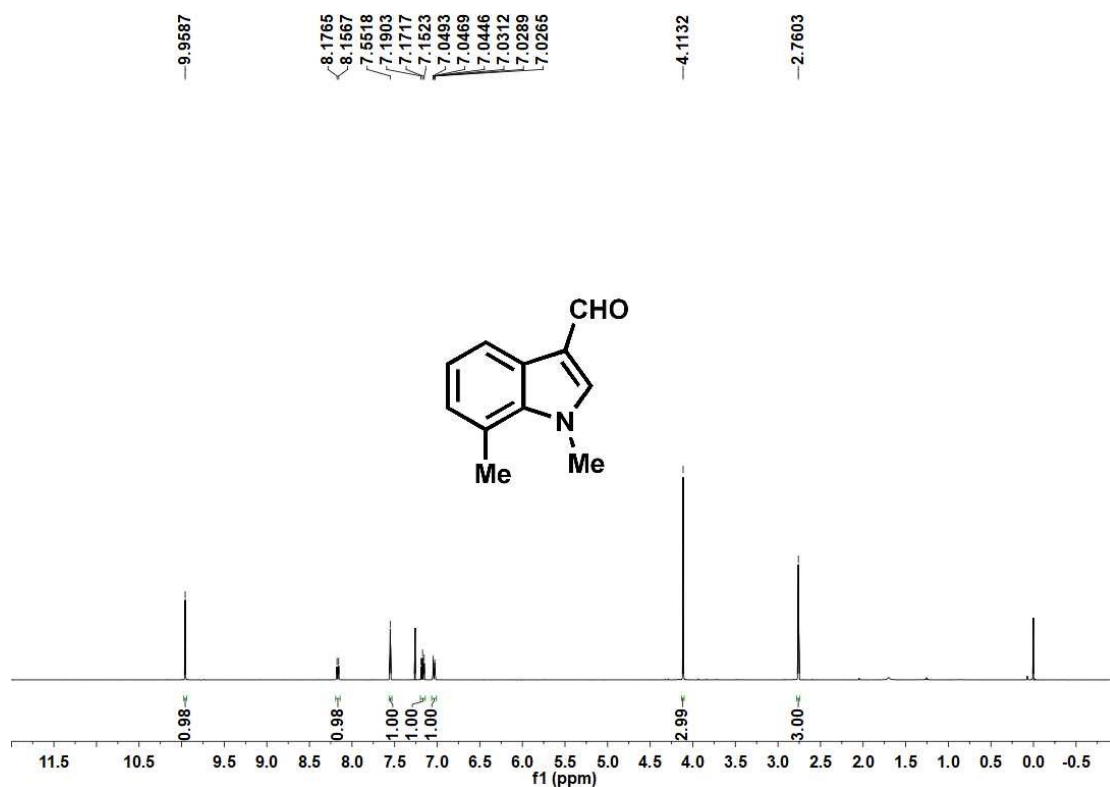

**<sup>13</sup>C NMR of product 2w in CDCl<sub>3</sub> (100 MHz)**

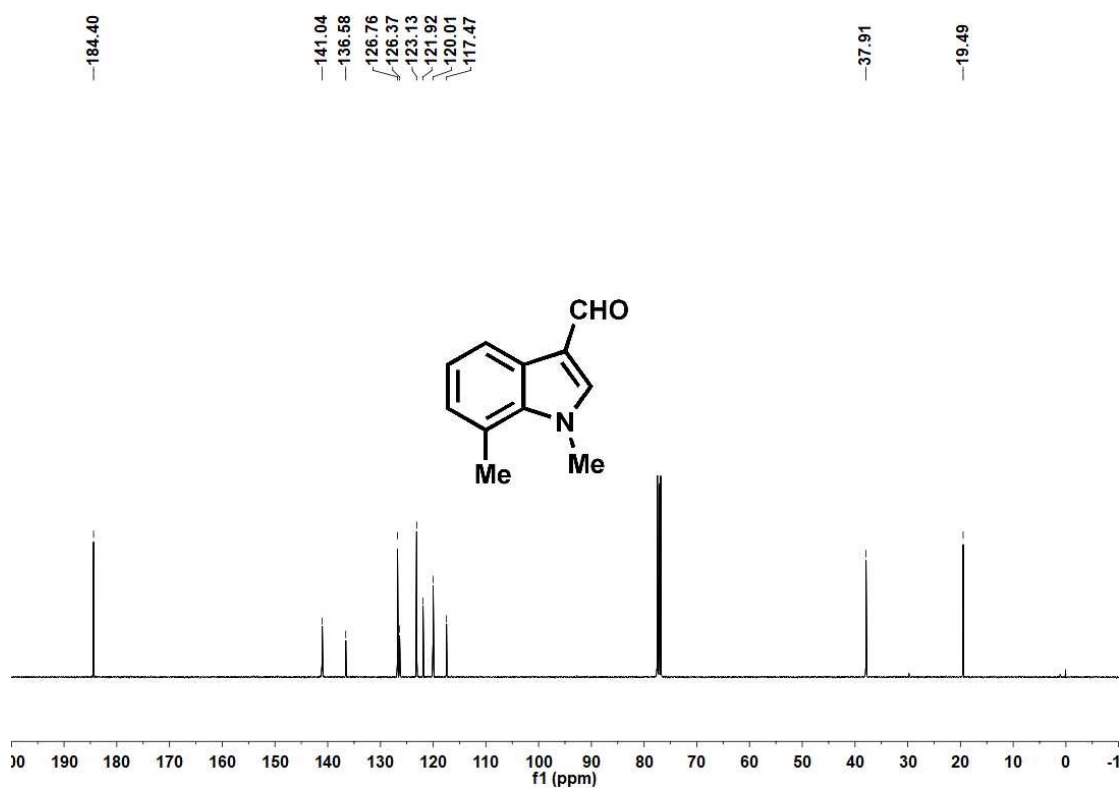



**<sup>1</sup>H NMR of product 2x in CDCl<sub>3</sub> (400 MHz)**

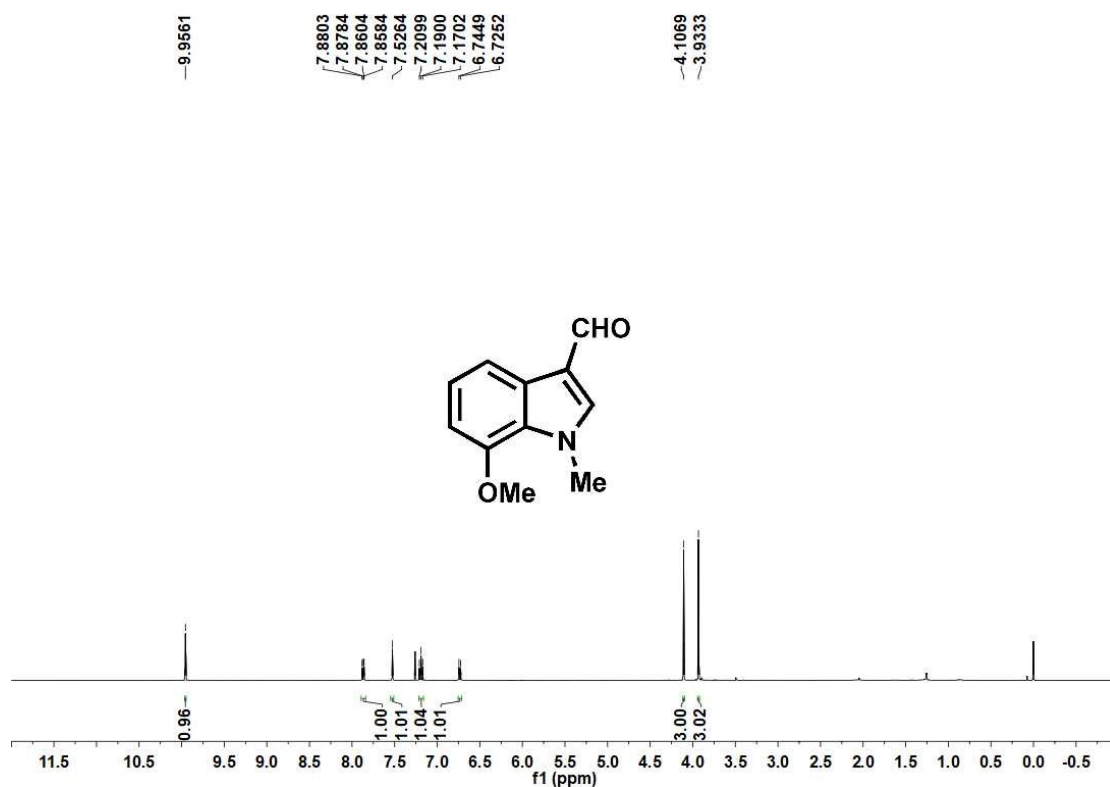

**<sup>13</sup>C NMR of product 2x in CDCl<sub>3</sub> (100 MHz)**

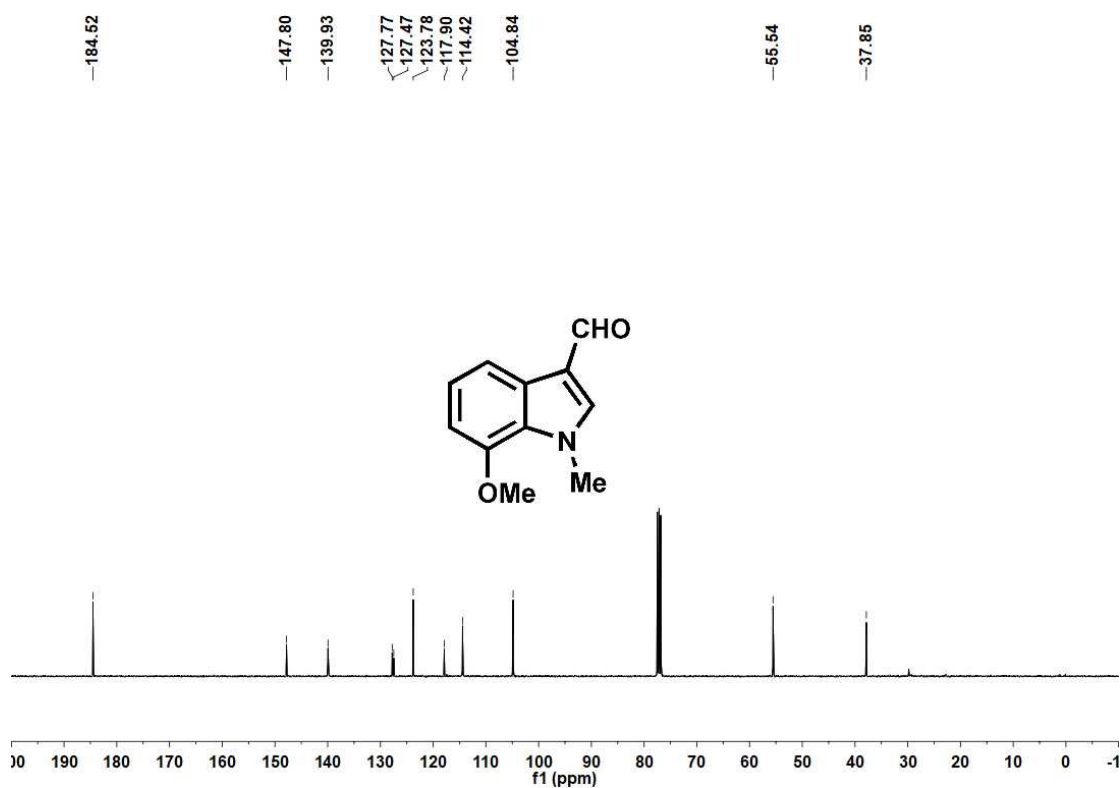

**$^1\text{H}$  NMR of product 2y in  $\text{DMSO-}d_6$  (400 MHz)**

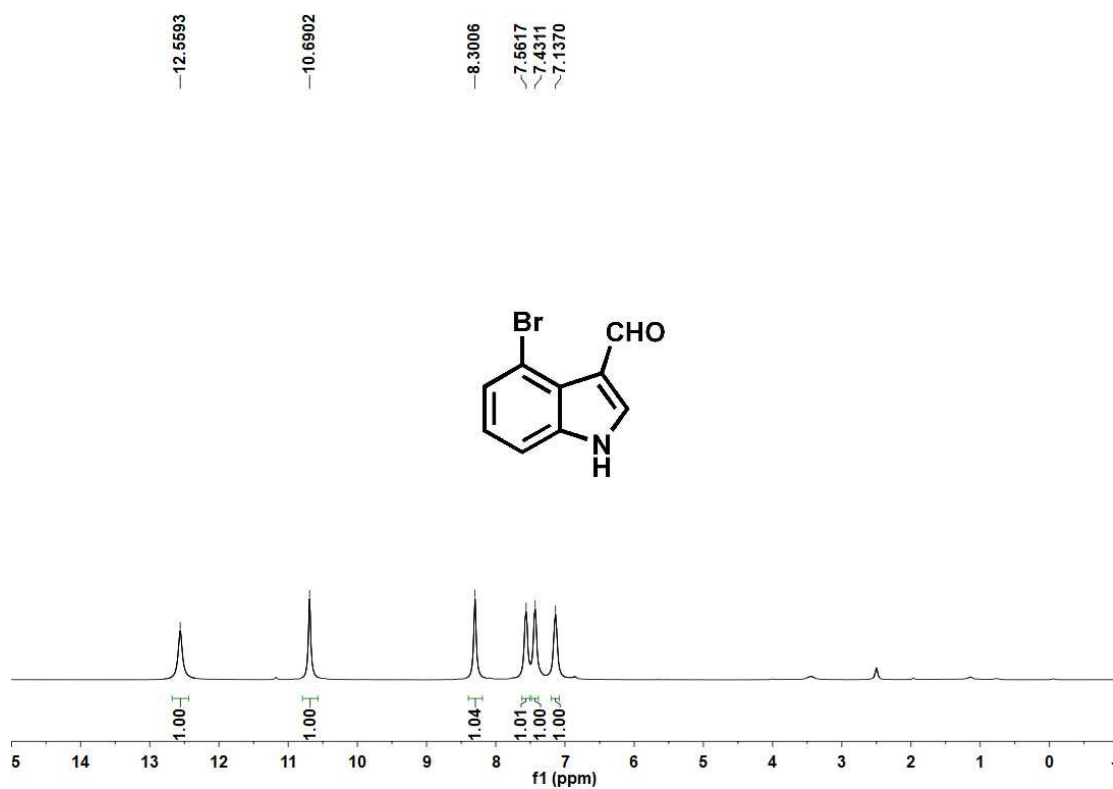

**$^{13}\text{C}$  NMR of product 2y in  $\text{DMSO-}d_6$  (100 MHz)**

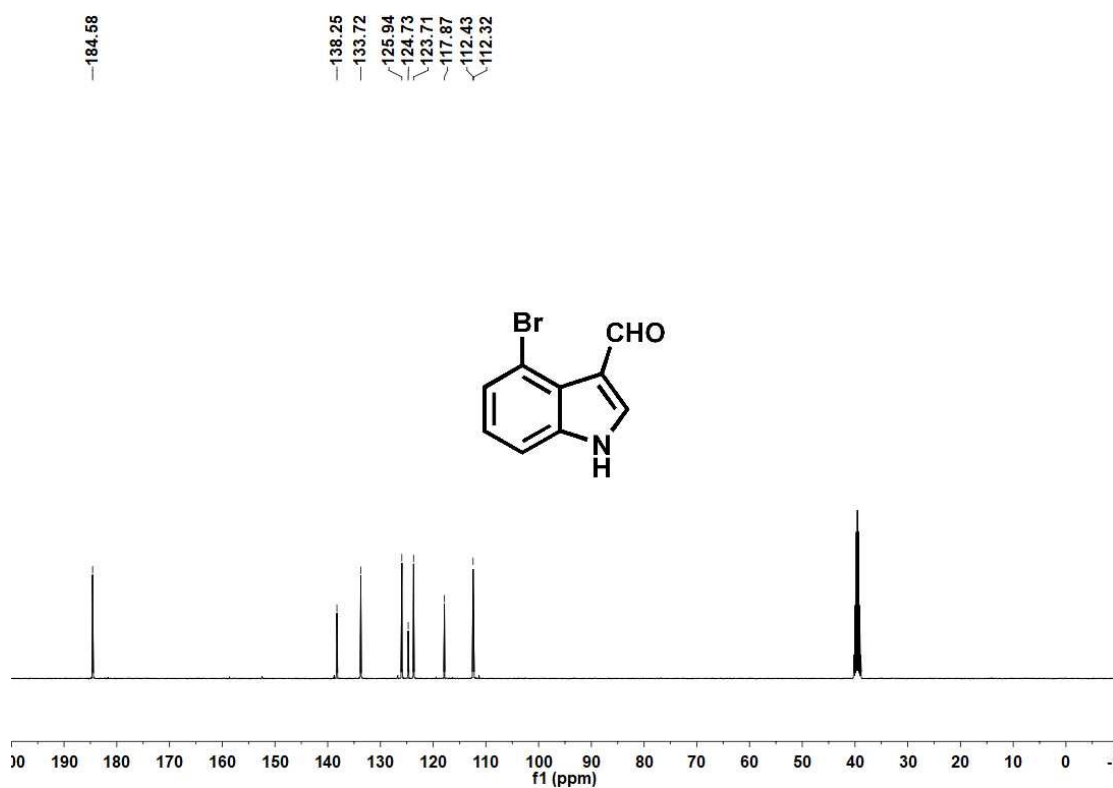

**$^1\text{H}$  NMR of product 2z in  $\text{DMSO-}d_6$  (400 MHz)**

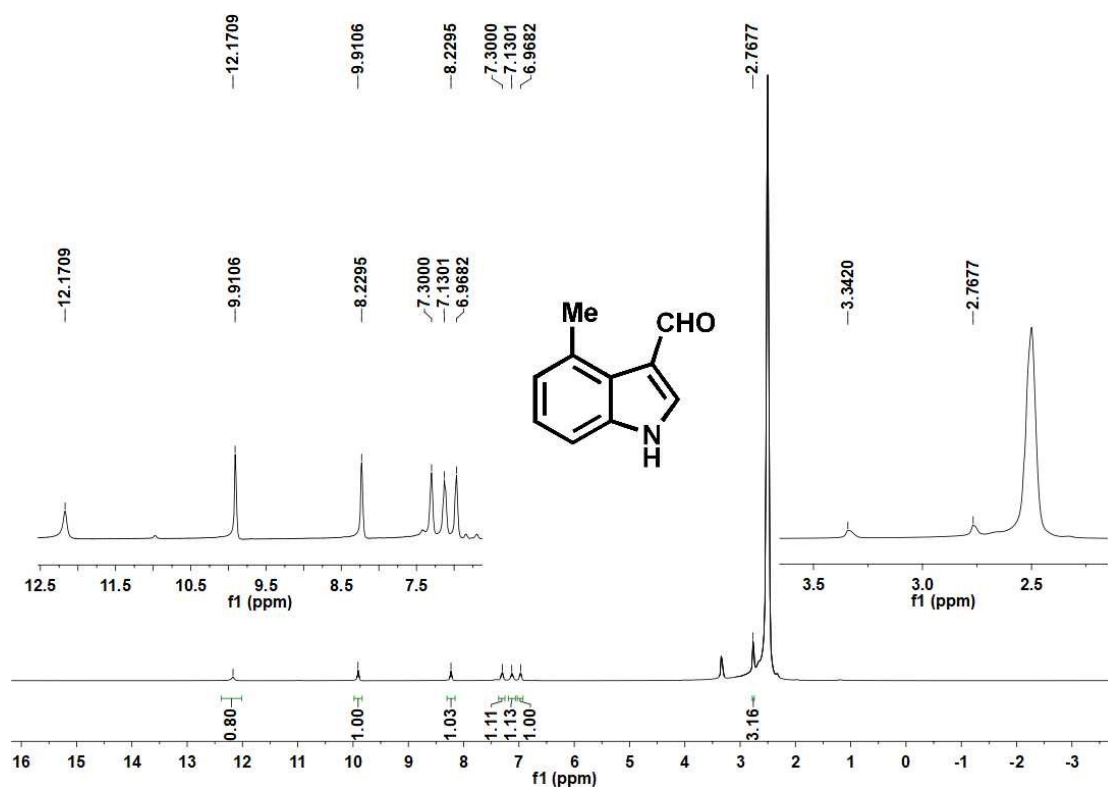

**$^{13}\text{C}$  NMR of product 2z in  $\text{DMSO-}d_6$  (100 MHz)**

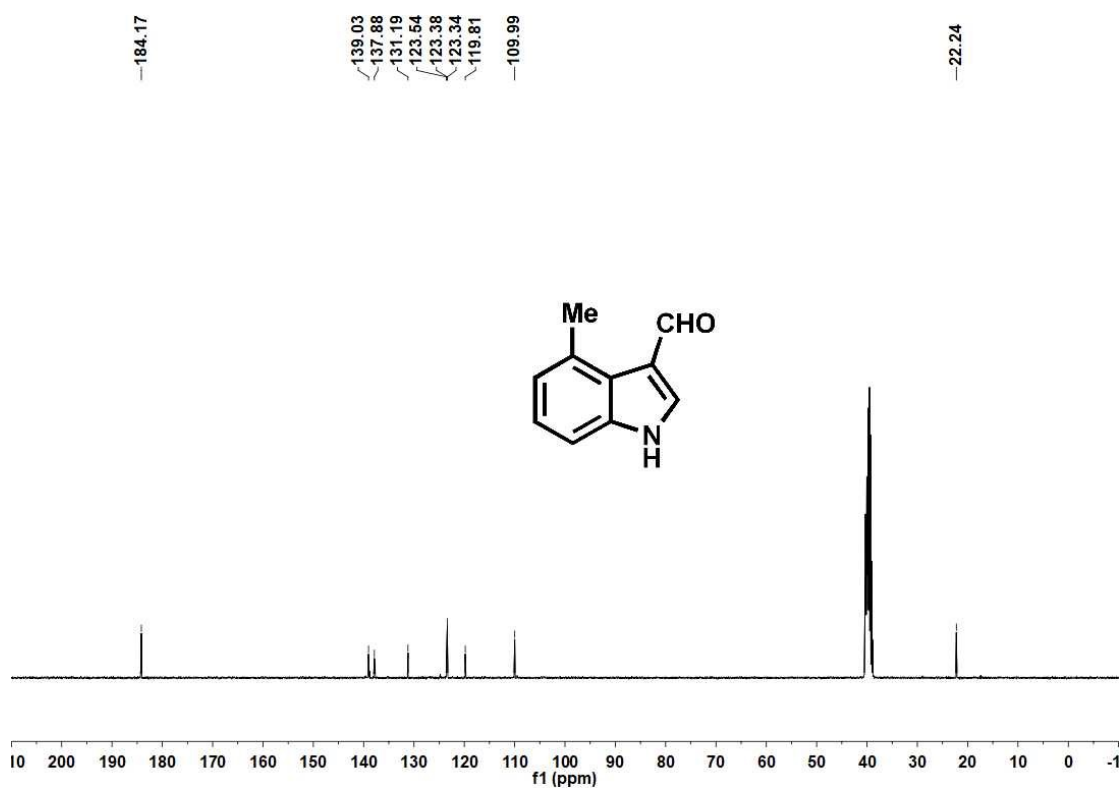

**<sup>1</sup>H NMR of product 2aa in DMSO-*d*<sub>6</sub> (400 MHz)**

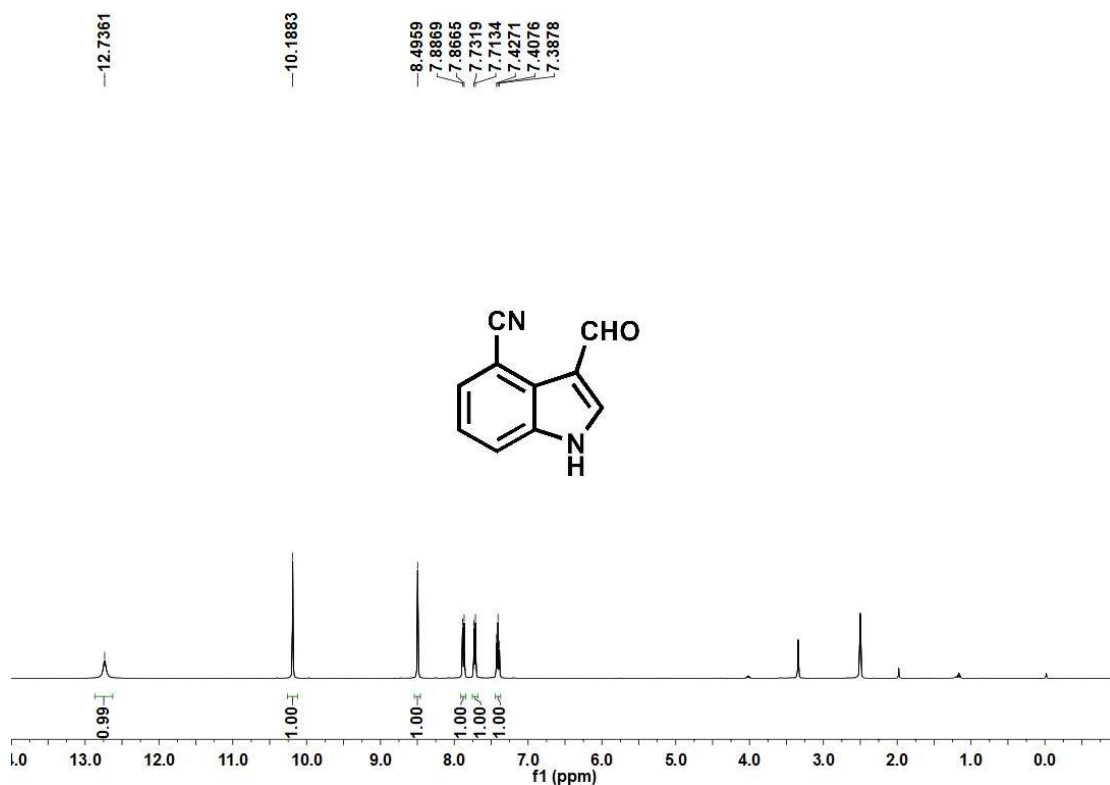

**<sup>13</sup>C NMR of product 2aa in DMSO-*d*<sub>6</sub> (100 MHz)**

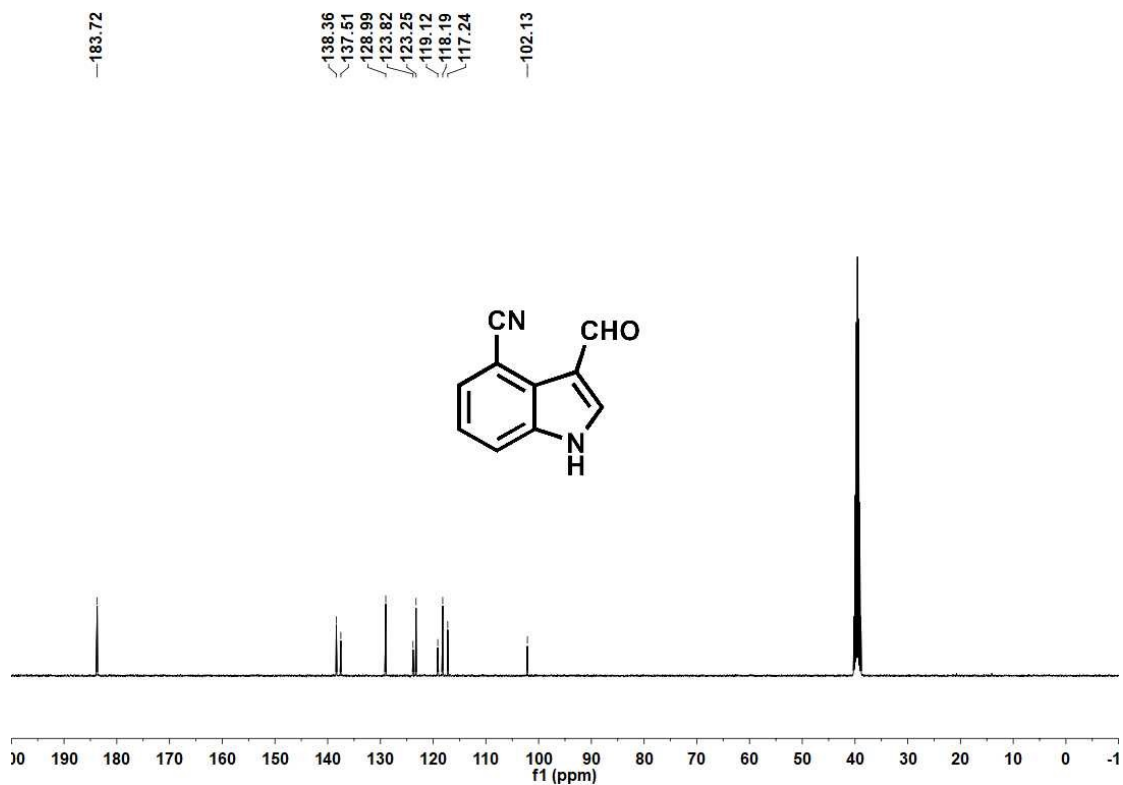

**<sup>1</sup>H NMR of product 2ab in DMSO-*d*<sub>6</sub> (400 MHz)**

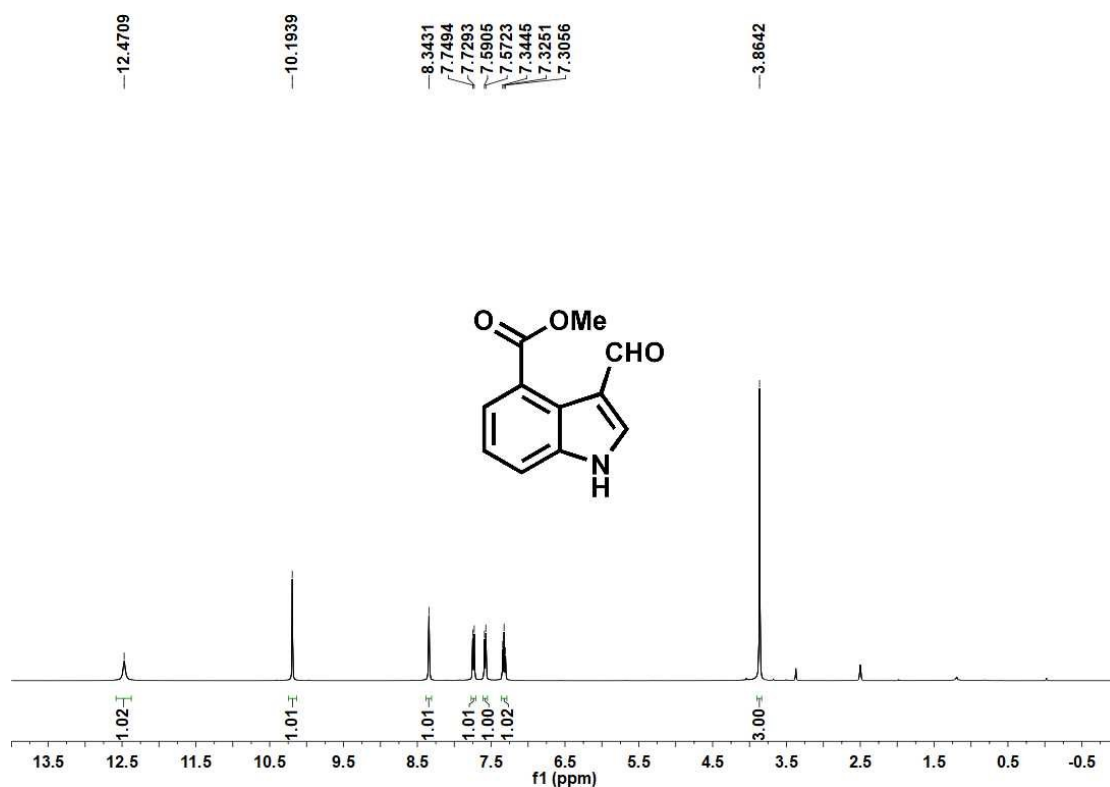

**<sup>13</sup>C NMR of product 2ab in DMSO-*d*<sub>6</sub> (100 MHz)**

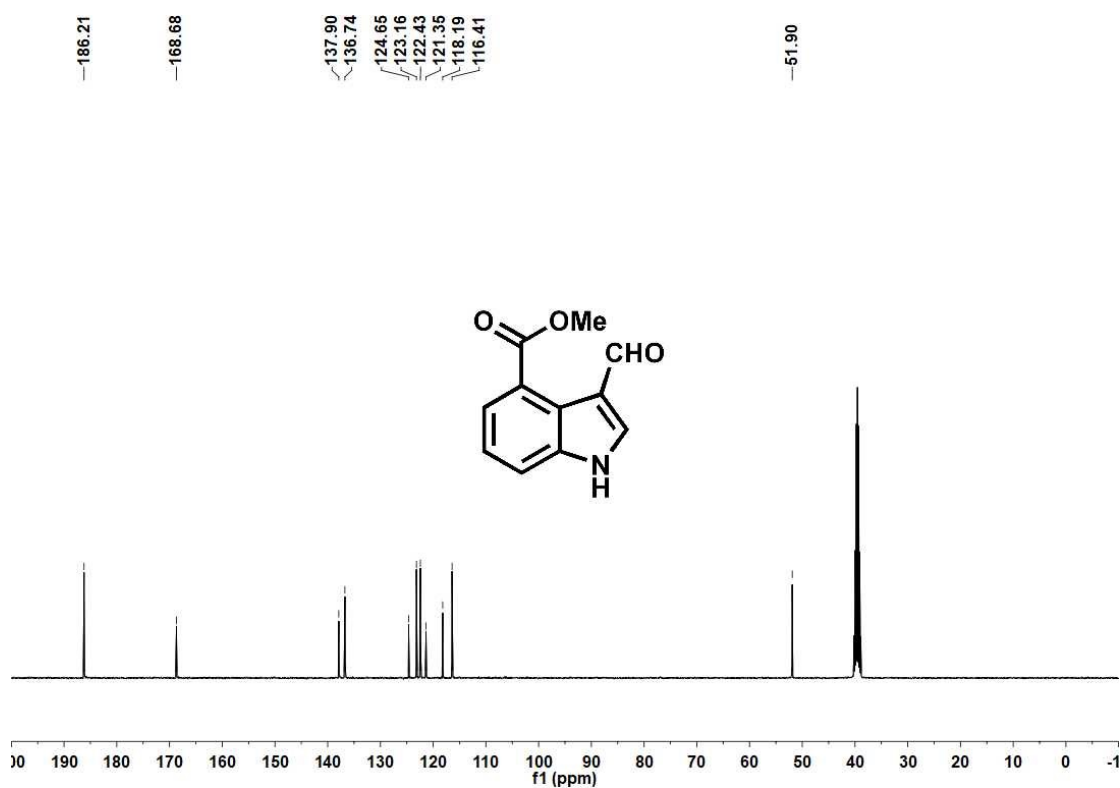

**<sup>1</sup>H NMR of product 2ac in DMSO-*d*<sub>6</sub> (400 MHz)**

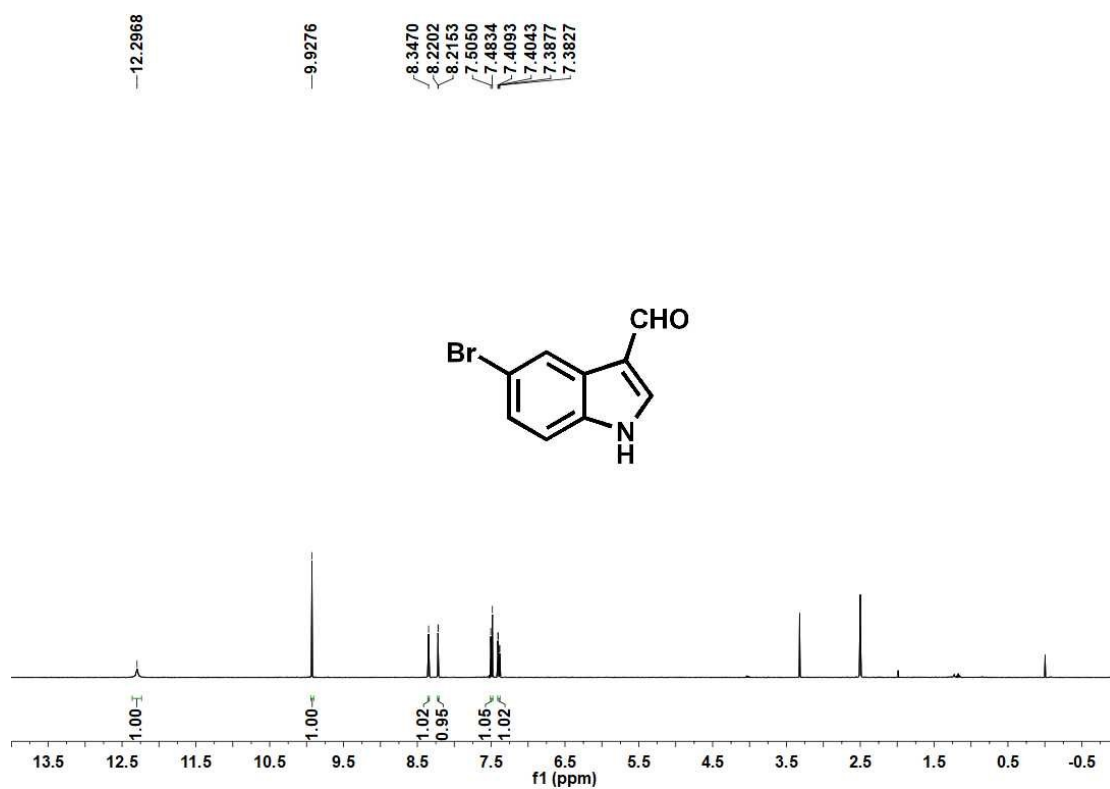

**<sup>13</sup>C NMR of product 2ac in DMSO-*d*<sub>6</sub> (100 MHz)**

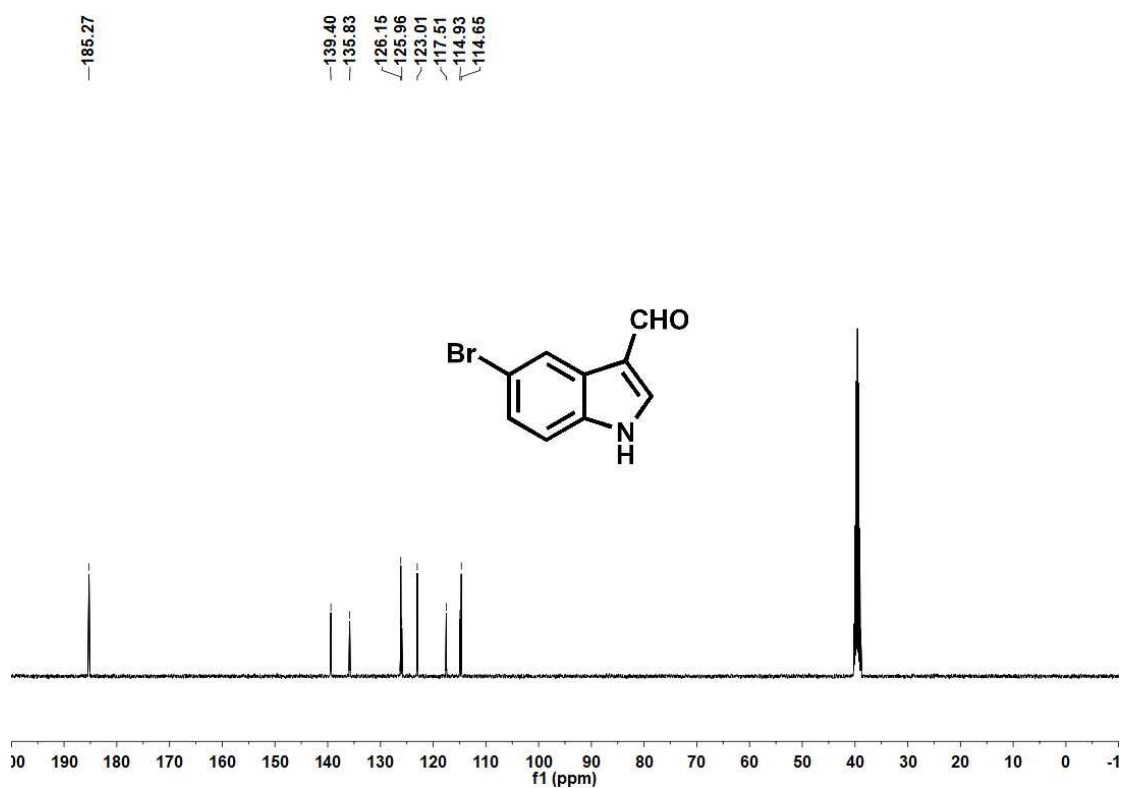

**<sup>1</sup>H NMR of product 2ad in DMSO-*d*<sub>6</sub> (400 MHz)**

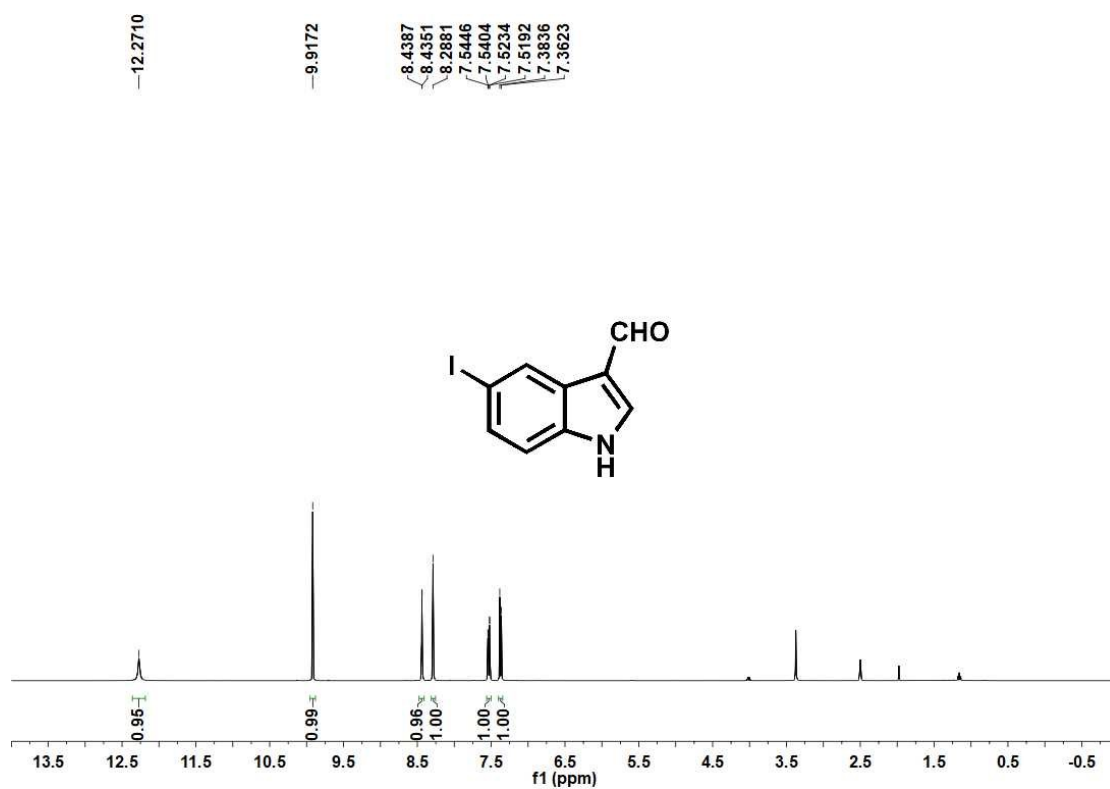

**<sup>13</sup>C NMR of product 2ad in DMSO-*d*<sub>6</sub> (100 MHz)**

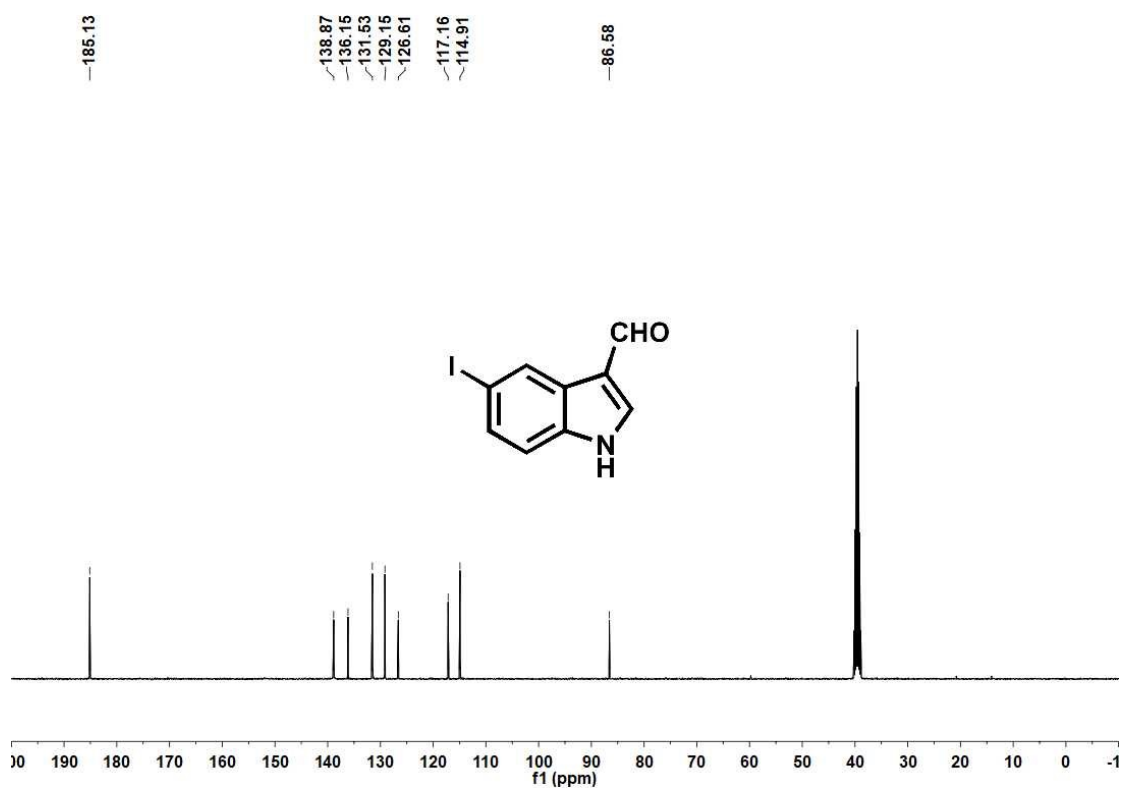

### <sup>1</sup>H NMR of product 2ae in DMSO-*d*<sub>6</sub> (400 MHz)

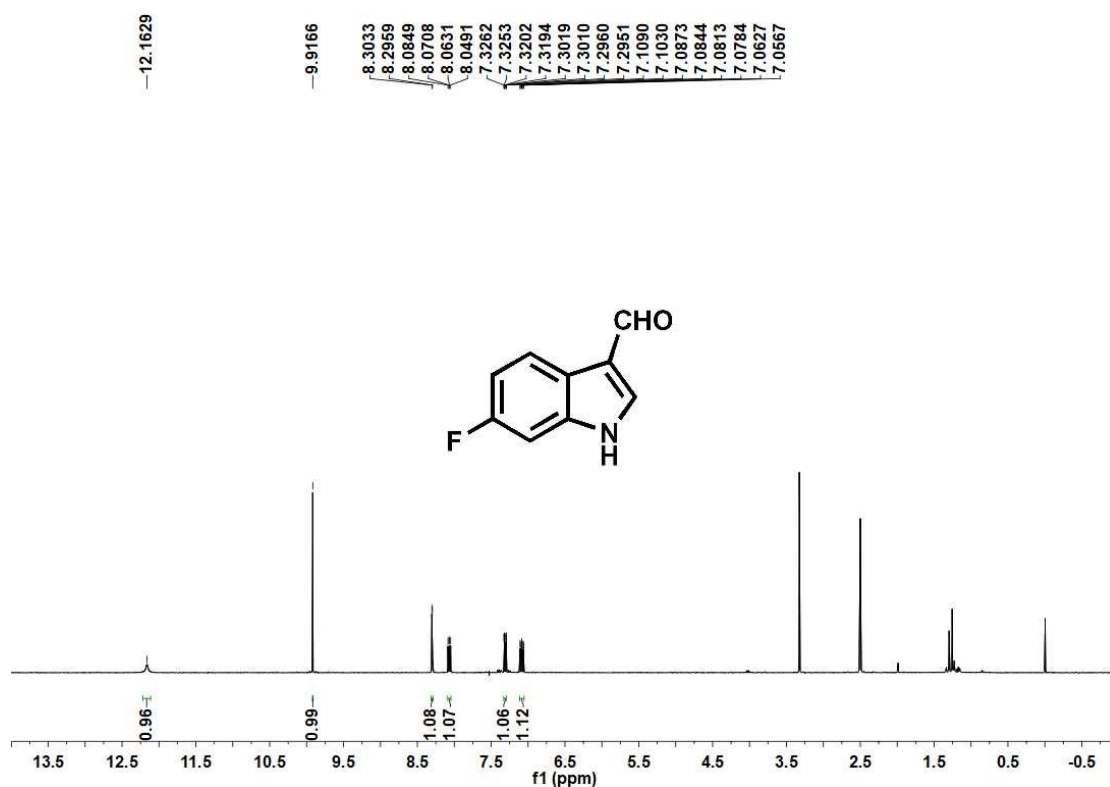

### <sup>13</sup>C NMR of product 2ae in DMSO-*d*<sub>6</sub> (100 MHz)

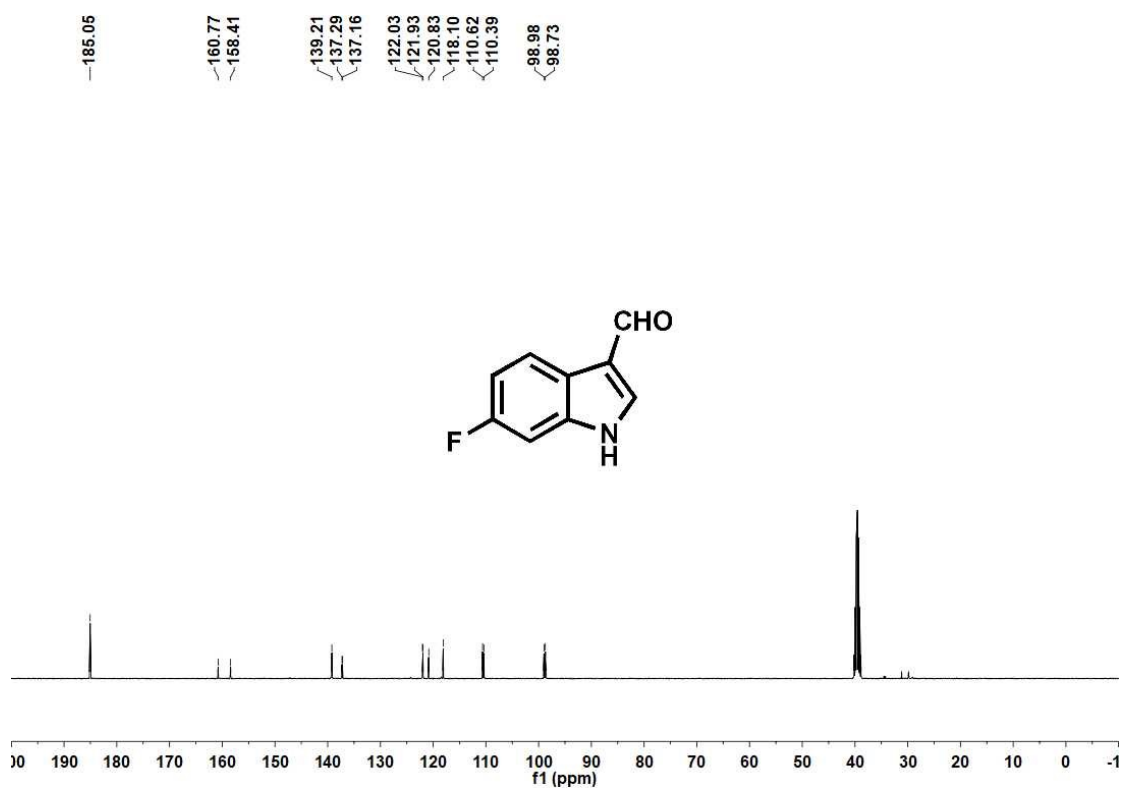



**<sup>1</sup>H NMR of product 2af in DMSO-*d*<sub>6</sub> (400 MHz)**

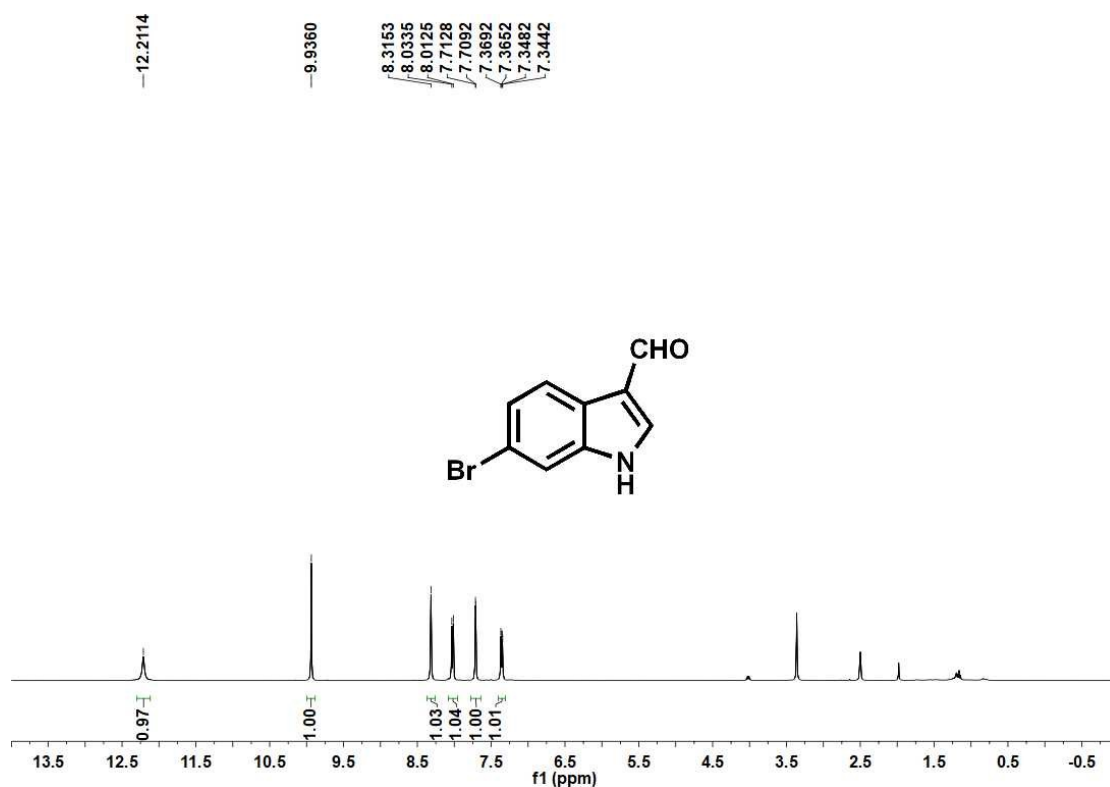

**<sup>13</sup>C NMR of product 2af in DMSO-*d*<sub>6</sub> (100 MHz)**

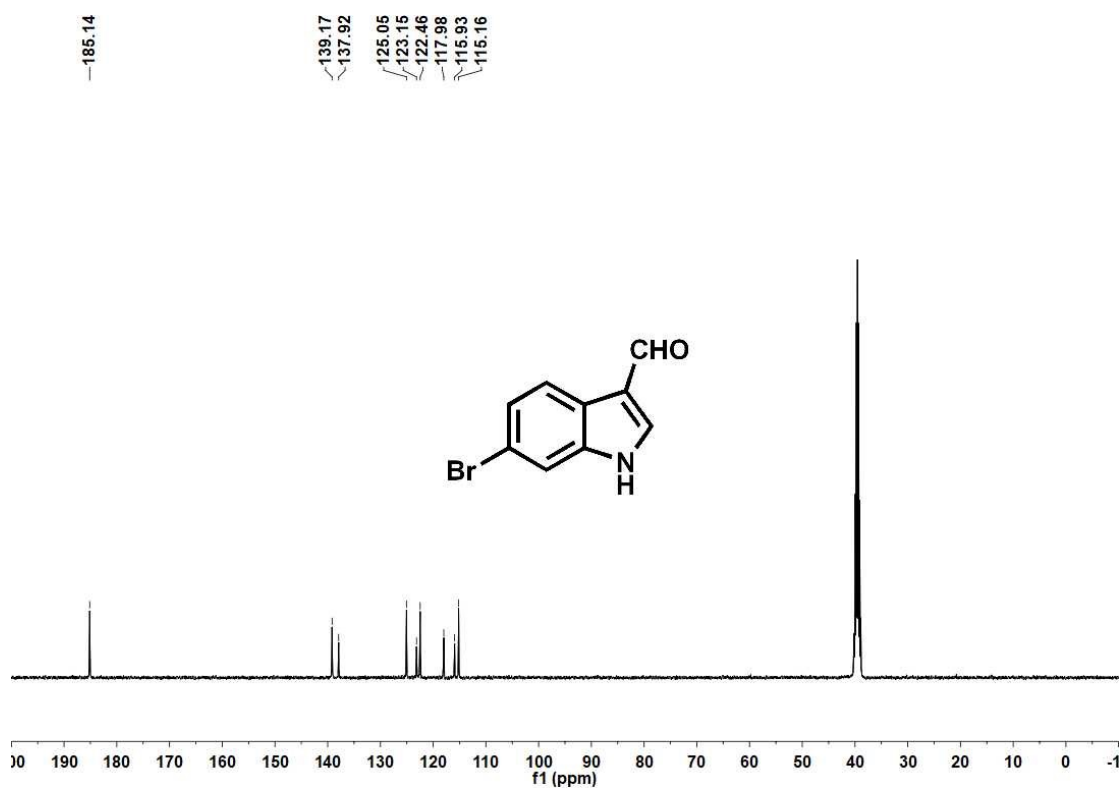

**<sup>1</sup>H NMR of product 2ag in DMSO-*d*<sub>6</sub> (400 MHz)**

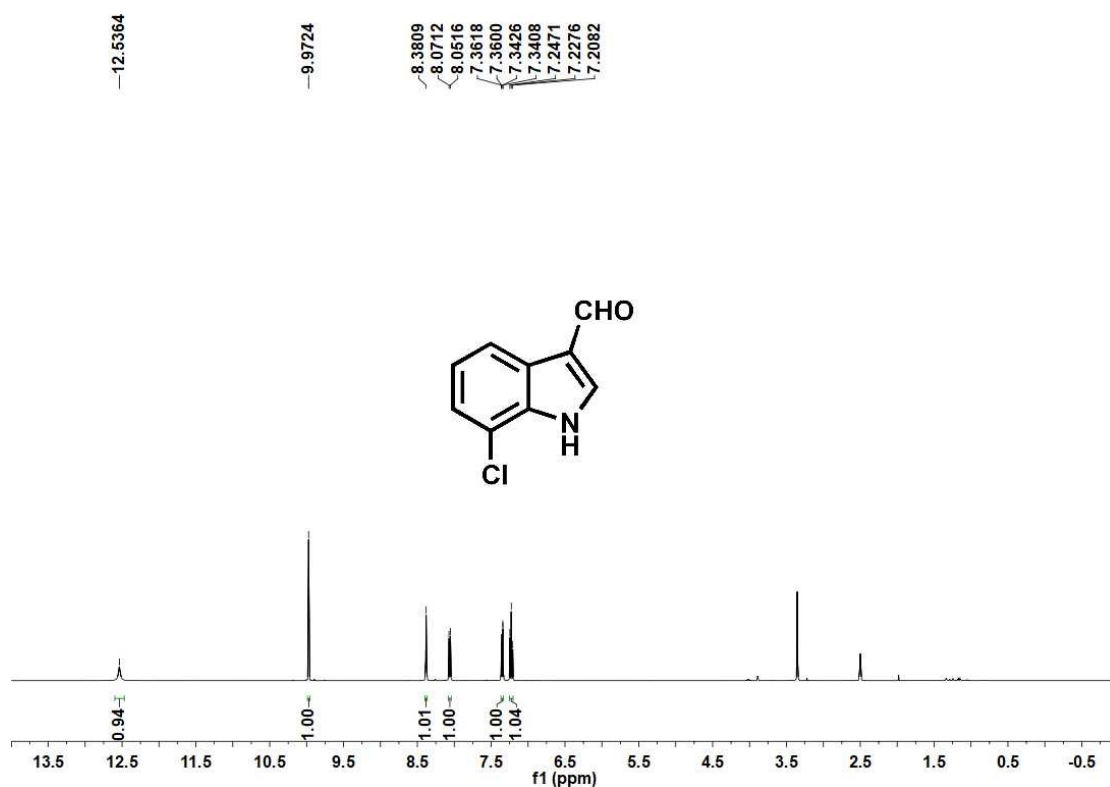

**<sup>13</sup>C NMR of product 2ag in DMSO-*d*<sub>6</sub> (100 MHz)**

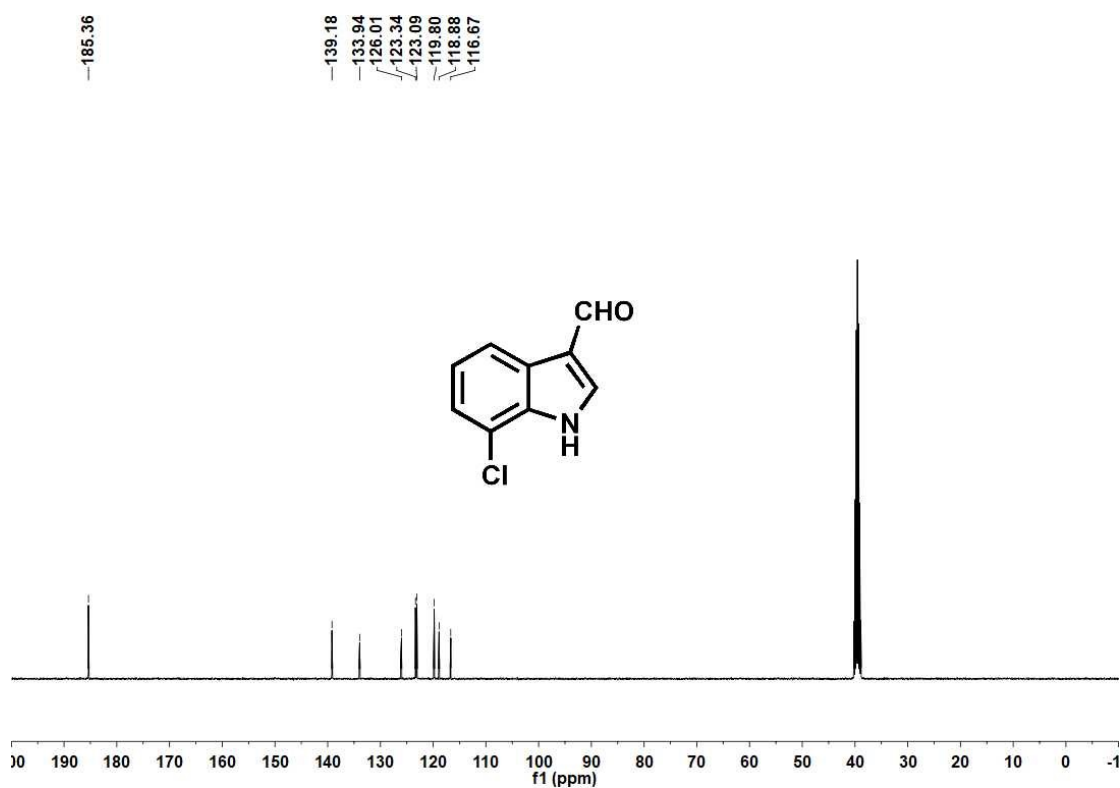

**$^1\text{H}$  NMR of product 2ah in  $\text{DMSO-}d_6$  (400 MHz)**

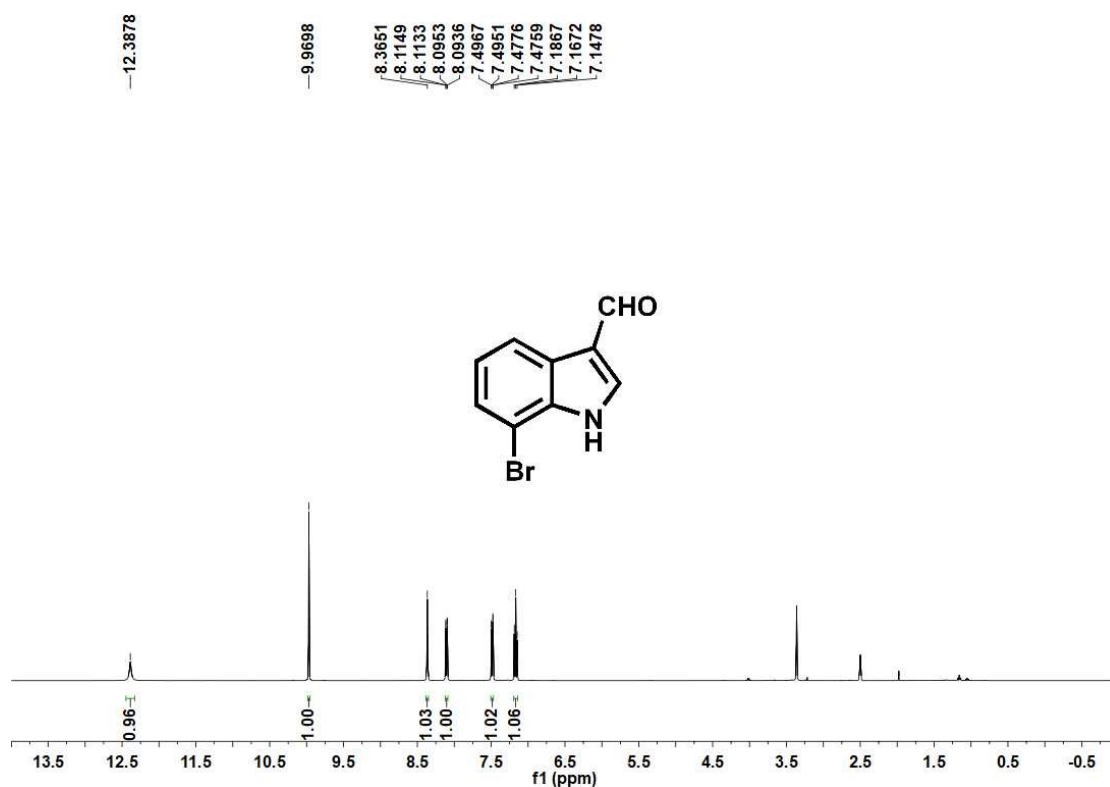

**$^{13}\text{C}$  NMR of product 2ah in  $\text{DMSO-}d_6$  (100 MHz)**

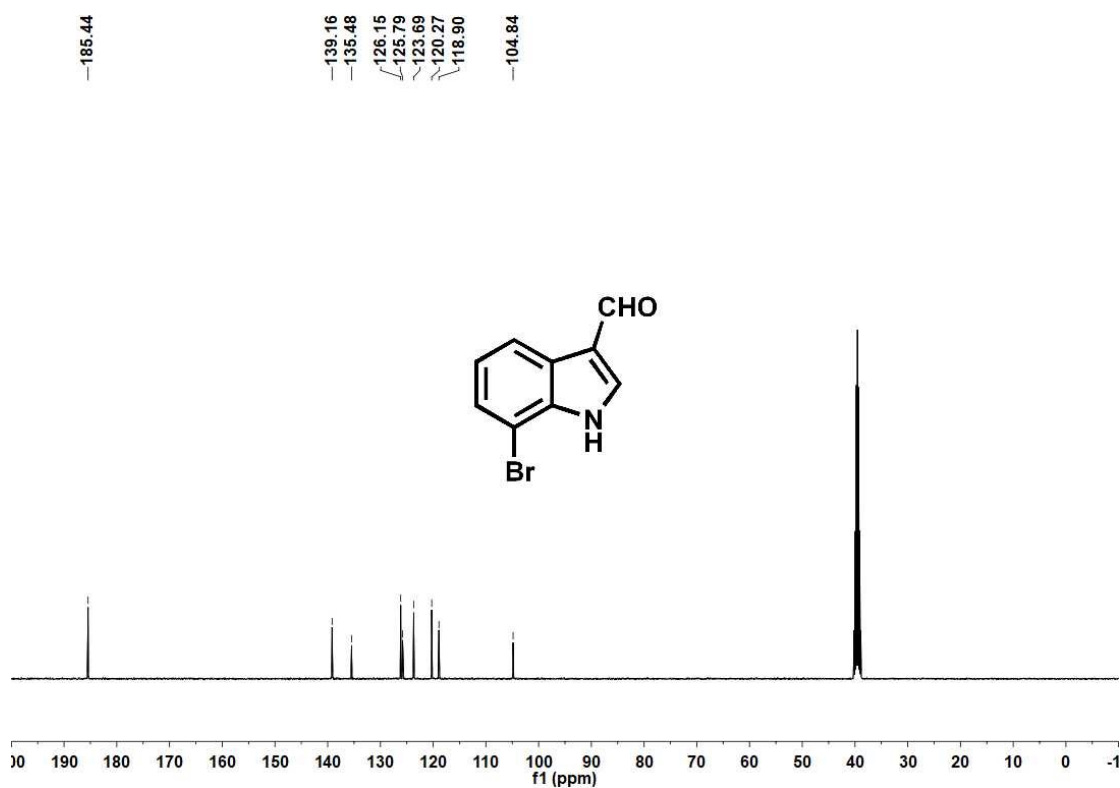

**<sup>1</sup>H NMR of product 2ai in DMSO-*d*<sub>6</sub> (400 MHz)**

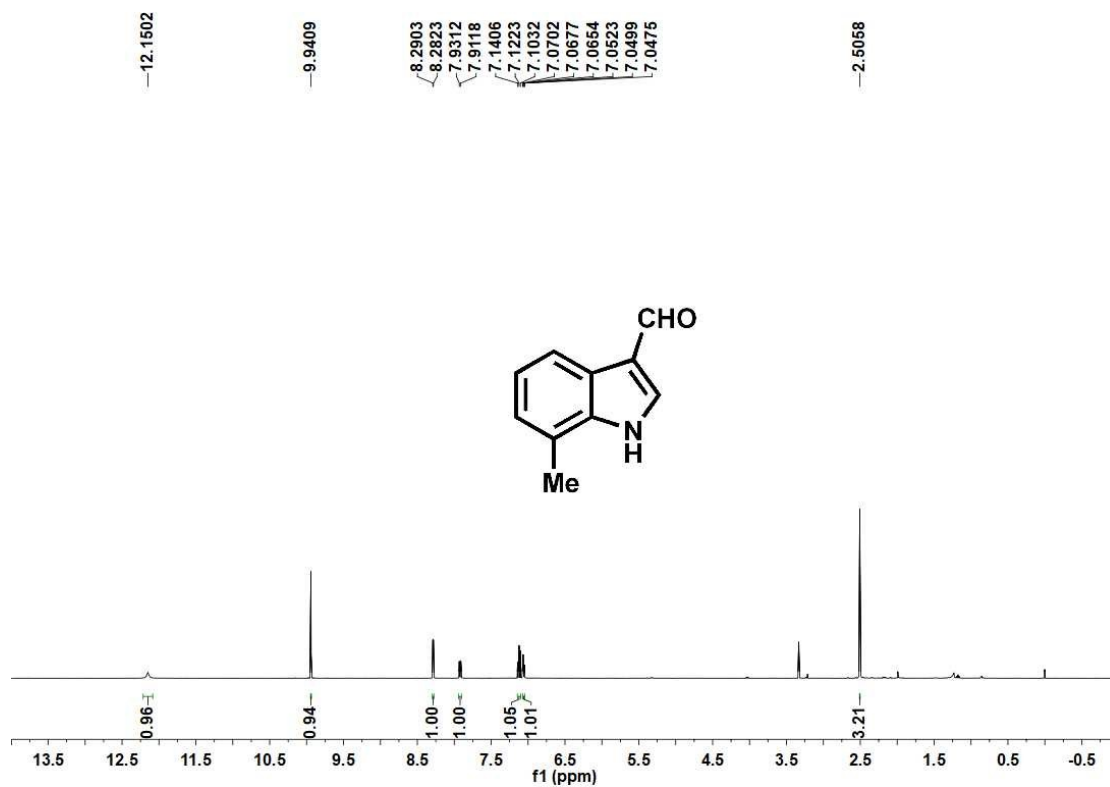

**<sup>13</sup>C NMR of product 2ai in DMSO-*d*<sub>6</sub> (100 MHz)**

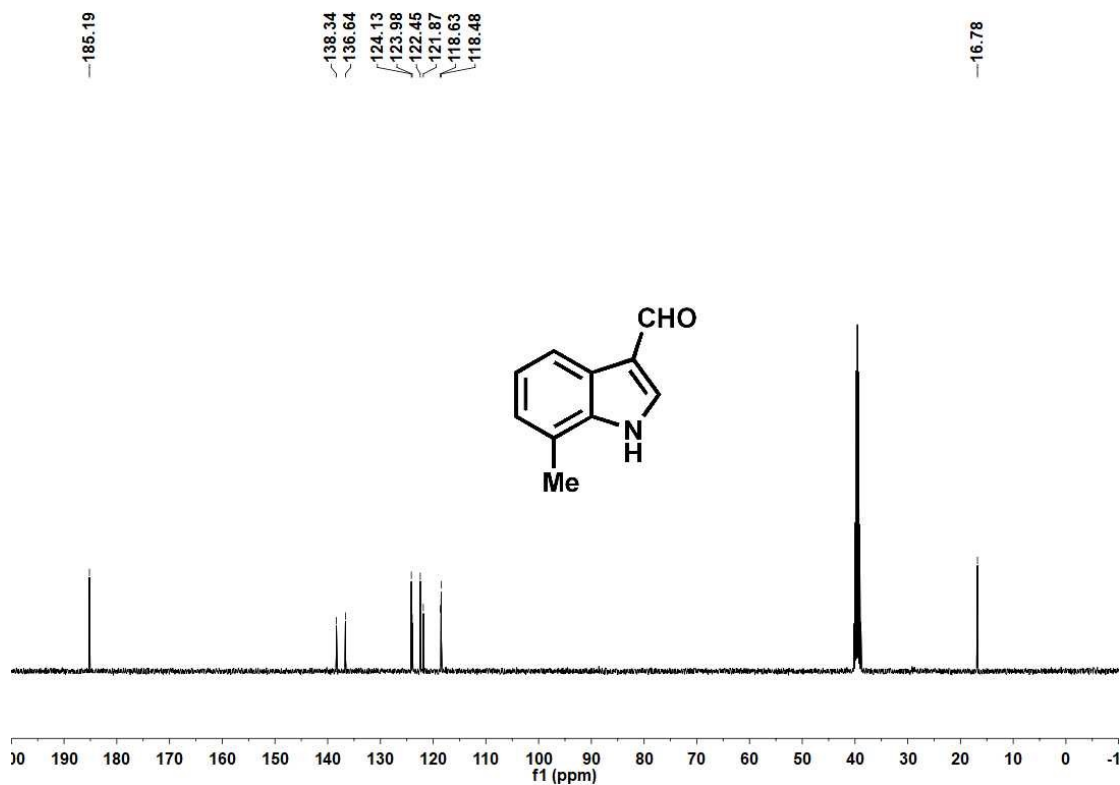

### <sup>1</sup>H NMR of product 2aj in DMSO-*d*<sub>6</sub> (400 MHz)

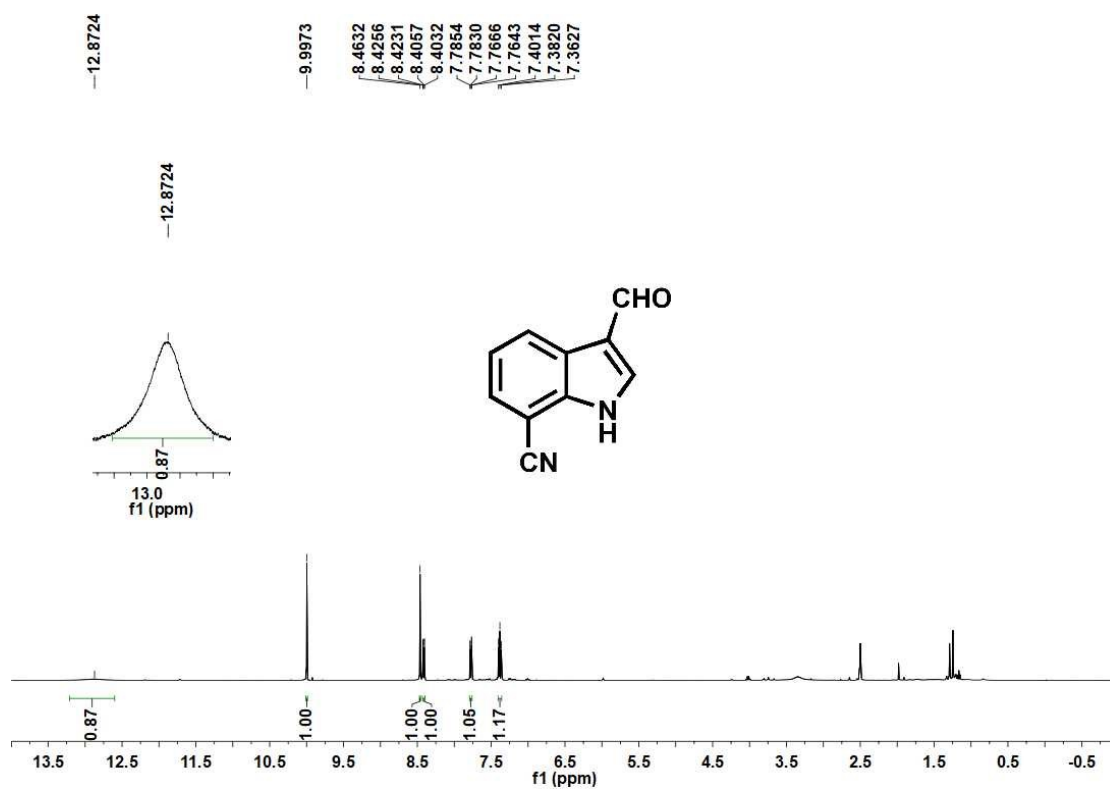

### <sup>13</sup>C NMR of product 2aj in DMSO-*d*<sub>6</sub> (100 MHz)

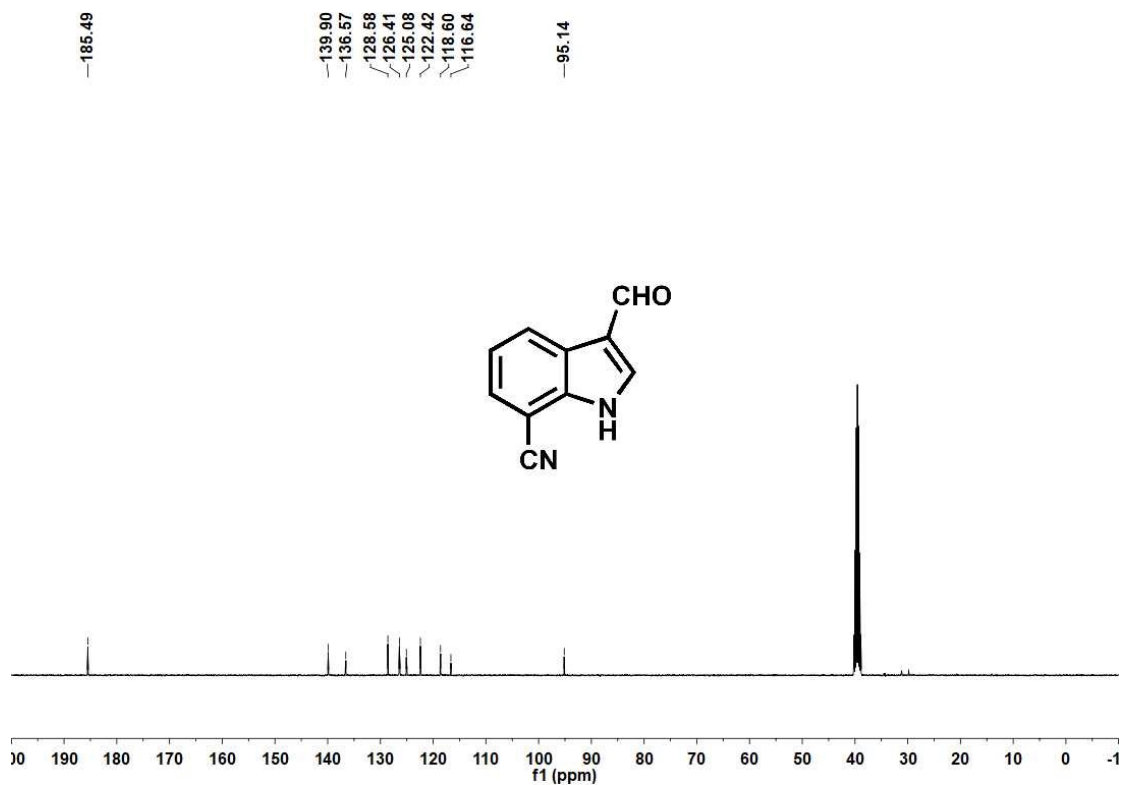

**<sup>1</sup>H NMR of product 2ak in DMSO-*d*<sub>6</sub> (400 MHz)**

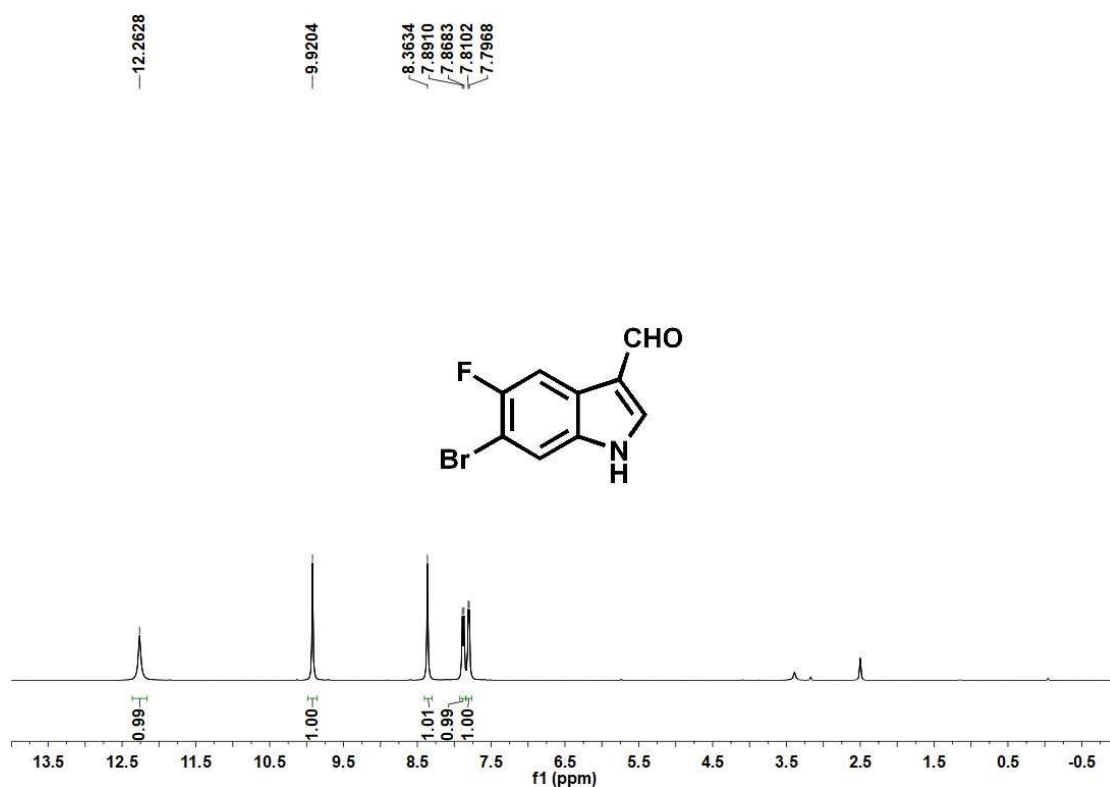

**<sup>13</sup>C NMR of product 2ak in DMSO-*d*<sub>6</sub> (100 MHz)**

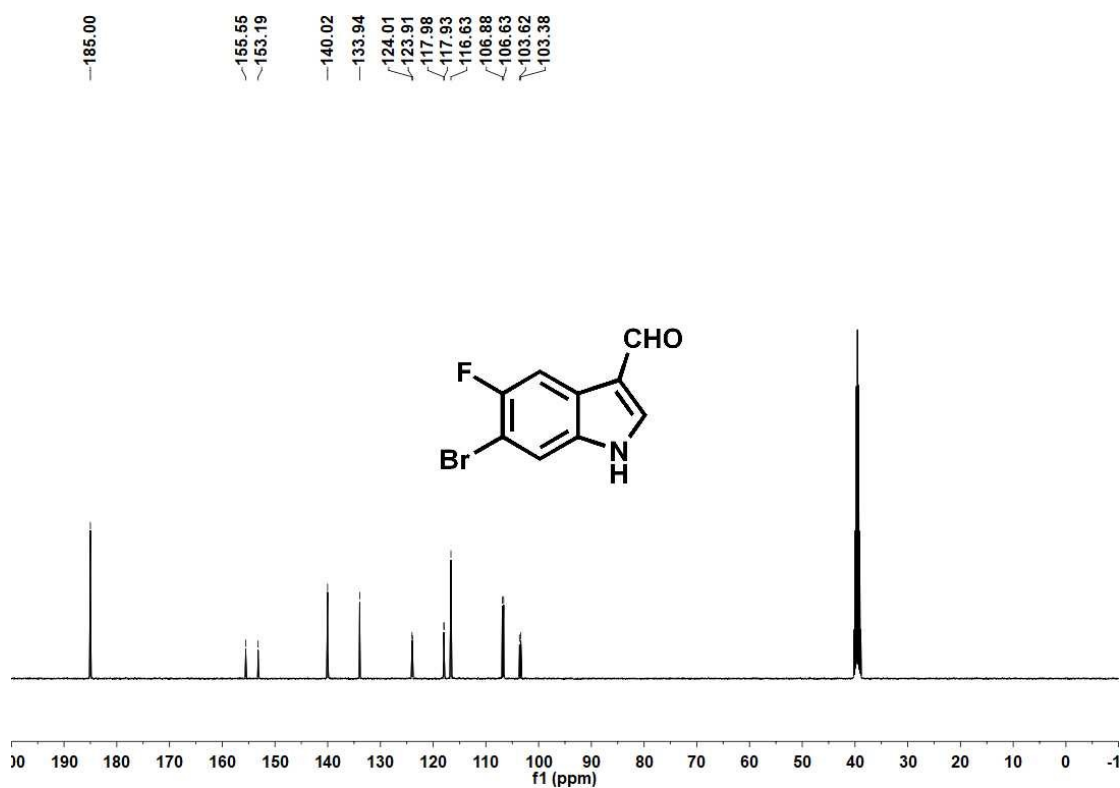

**<sup>1</sup>H NMR of product 2al in DMSO-*d*<sub>6</sub> (400 MHz)**

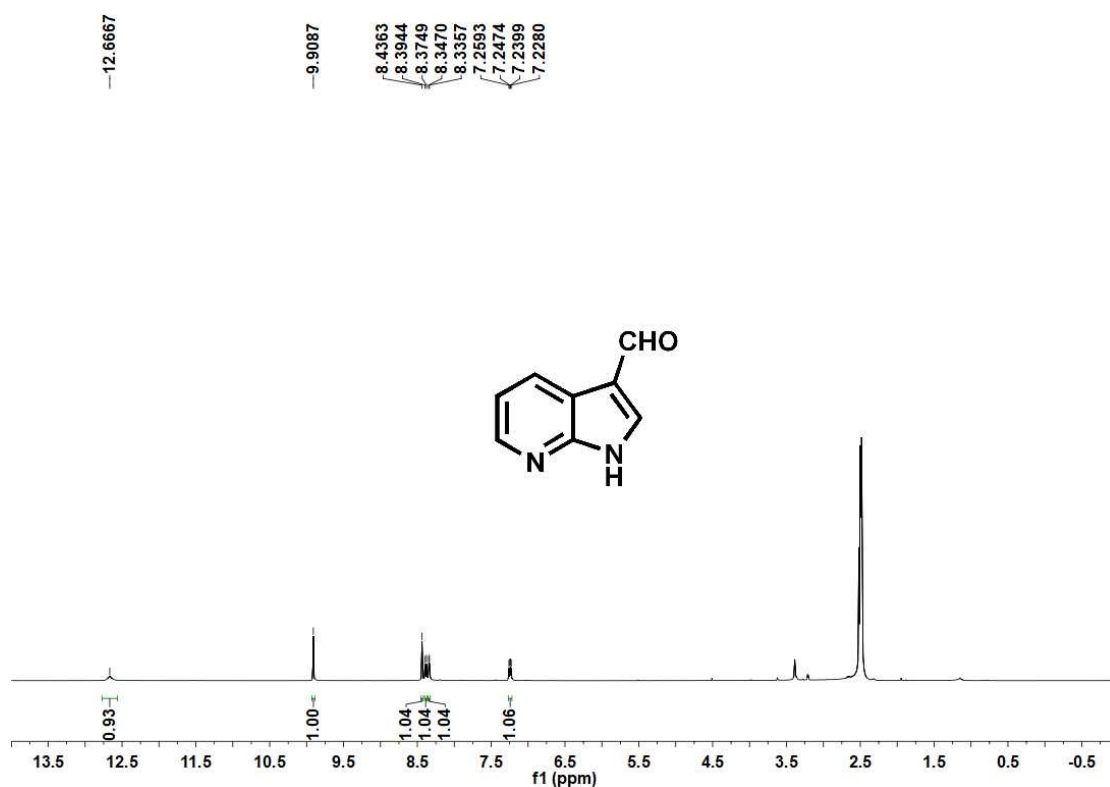

**<sup>13</sup>C NMR of product 2al in DMSO-*d*<sub>6</sub> (100 MHz)**

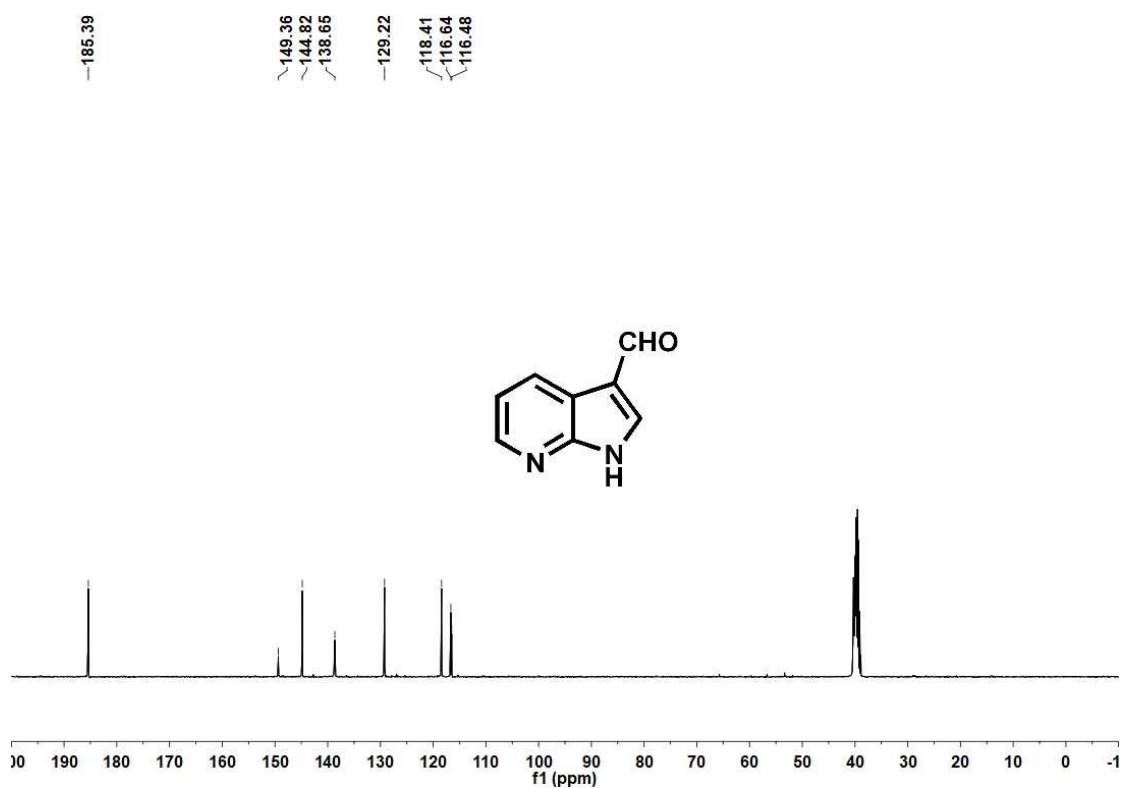

### $^1\text{H}$ NMR of product 3 in $\text{CDCl}_3$ (400 MHz)

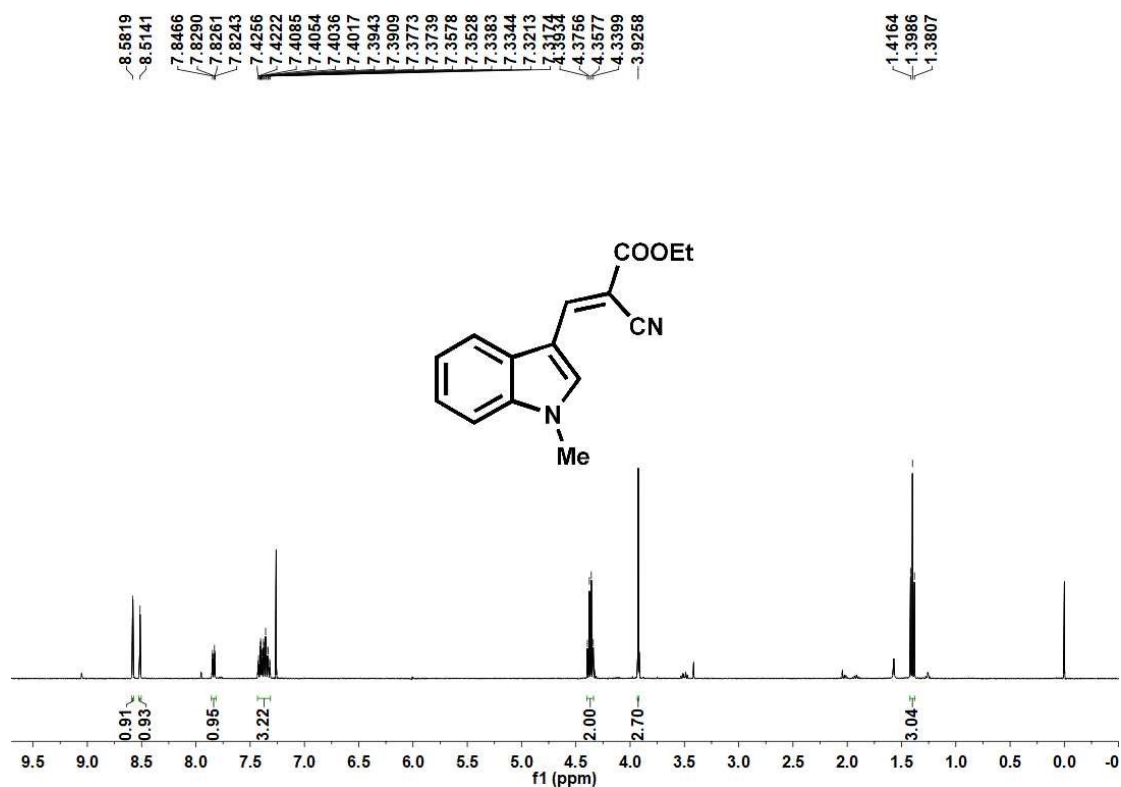

### $^{13}\text{C}$ NMR of product 3 in $\text{CDCl}_3$ (400 MHz)

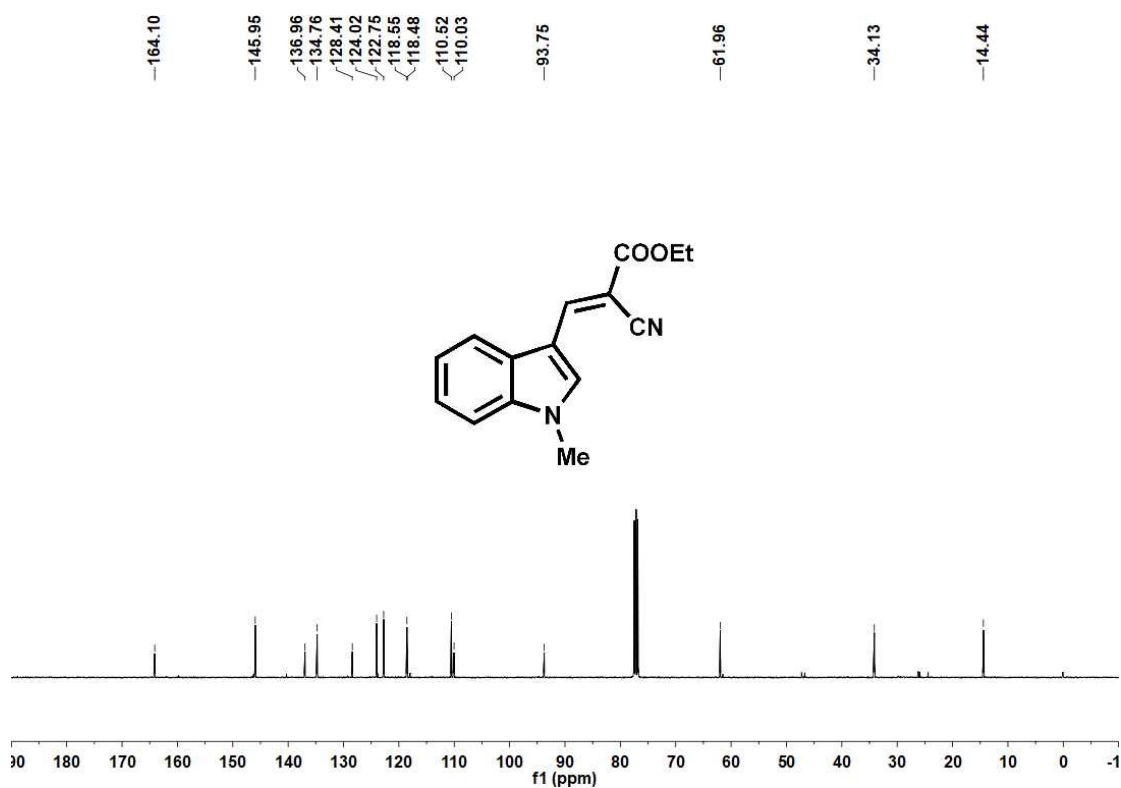



### <sup>1</sup>H NMR of product 4 in DMSO-*d*<sub>6</sub> (400 MHz)

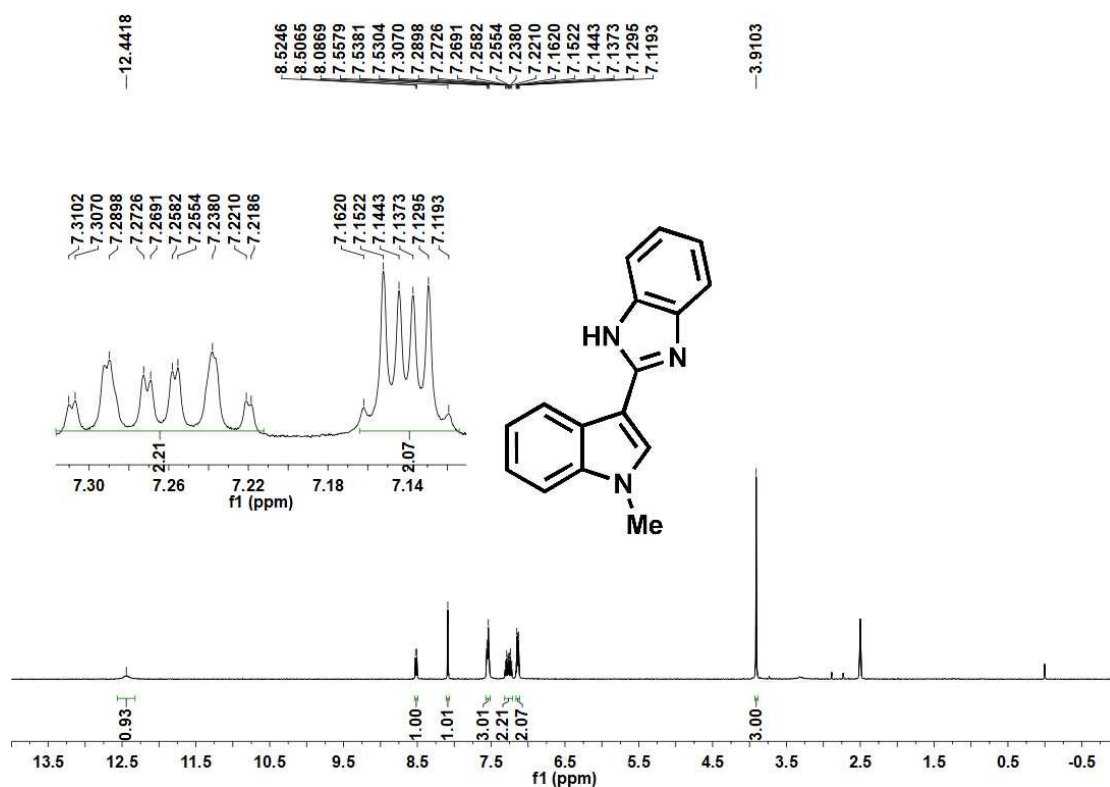

### <sup>13</sup>C NMR of product 4 in DMSO-*d*<sub>6</sub> (100 MHz)

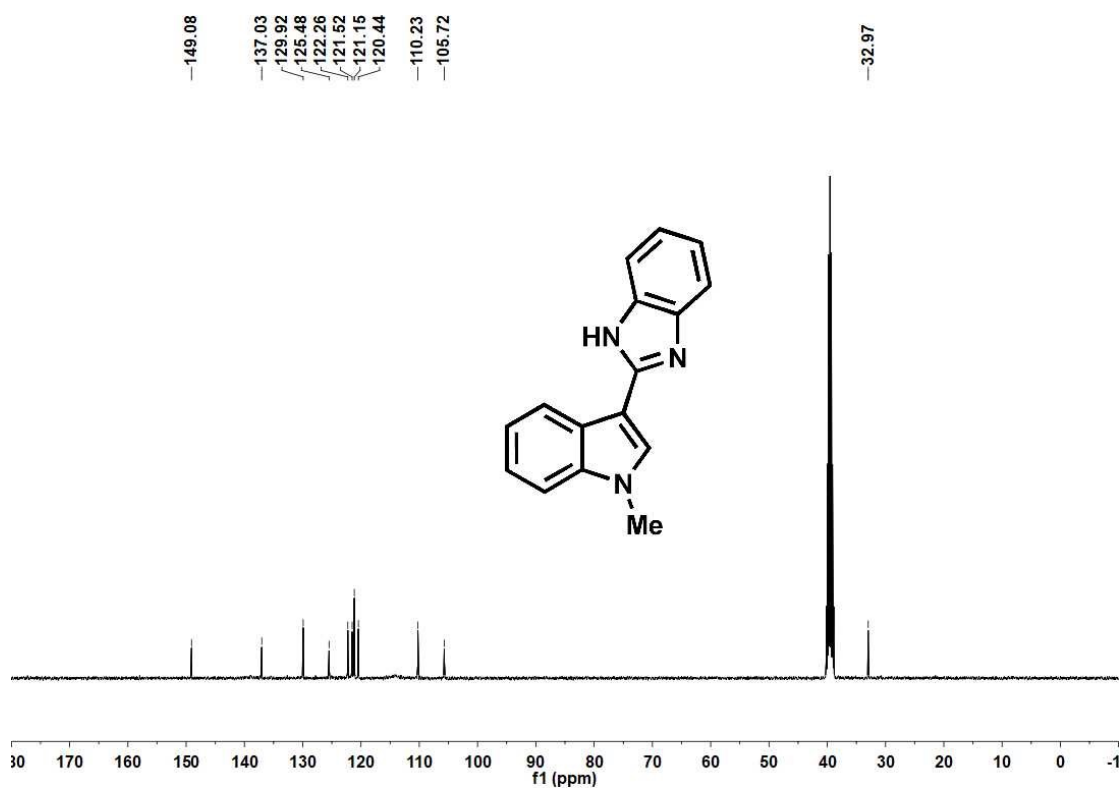

Supplement: d2gc03858g1.pdf [file d2gc03858g1.pdf]
